# Supplementary material for: Efficacy of covid-19 vaccines in immunocompromised patients: systematic review and meta-analysis
Source: PubMed Central journal article supplement — BMJ. 2022 Mar 2;376:e068632. doi: 10.1136/bmj-2021-068632 (PMC8889026; doi:10.1136/bmj-2021-068632), 2022-03-02
Supplement: ryaa068632.ww.pdf [file ryaa068632.ww.pdf]

### **Supplementary tables & figures:**

1. Supplementary table 1: Search strategy
2. Supplementary table 2: Trial characteristics
3. Supplementary table 3: Antibody titres after the first dose of COVID-19 vaccine
4. Supplementary table 4: Antibody titres after a second dose of COVID-19 vaccine
5. Supplementary table 5: Seroconversion rates and serological titres after a third dose of COVID-19 vaccine
6. Supplementary figure 1. Subgroup analysis of cancer type among patients with haematological cancer after second dose
7. Supplementary figure 2. Subgroup analysis of disease type among IMiD patients after second dose
8. Supplementary figure 3. Subgroup analysis of organ type among transplant recipients after second dose
9. Supplementary figure 4. Subgroup analysis of vaccine type among IMiD patients after second dose
10. Supplementary tables 6 to 11: Subgroup analyses performed of seroconversion RR amongst immunocompromised patients
11. Supplementary tables 12 to 17: Mixed effects meta-regression of RRs against potential effect moderators (continuous and categorical study-level characteristics) for the longitudinal association of immunocompromised states with seroconversion RR after first and second doses of COVID-19 vaccines
12. Supplementary table 18: Meta-analyses of seroconversion risk and seroconversion RR compared to immunocompetent individuals after the first dose of COVID-19 vaccine in subgroups, stratified by categorical study-level characteristics
13. Supplementary table 19: Meta-analyses of seroconversion risk and seroconversion RR compared to immunocompetent individuals after the second dose of COVID-19 vaccine in subgroups, stratified by categorical study-level characteristics
14. Supplementary table 20: Risk of bias of all included controlled observational studies using the ROBINS-I scale
15. Supplementary figures 5 to 13: Absolute risk of seroconversion among immunocompromised patients after the first and second dose
16. Supplementary figures 14 to 21: Funnel plots with trim-and-fill imputation of potentially missing studies after first dose and second dose in immunocompromised patients

**Supplementary table 1: Search strategy**

| Database           | Search terms                                                                                                                                                                                                                                                                                                                                                                                                                                                                                                                                                                                                                                                                                                                                                                                                                                                                                                                                                                                                                                                                                                                                                                                                                                                                                                                                                                                                                                                                                                                                                                                                                                                                                                                                                                                                                                                                                                                            | Results |
|--------------------|-----------------------------------------------------------------------------------------------------------------------------------------------------------------------------------------------------------------------------------------------------------------------------------------------------------------------------------------------------------------------------------------------------------------------------------------------------------------------------------------------------------------------------------------------------------------------------------------------------------------------------------------------------------------------------------------------------------------------------------------------------------------------------------------------------------------------------------------------------------------------------------------------------------------------------------------------------------------------------------------------------------------------------------------------------------------------------------------------------------------------------------------------------------------------------------------------------------------------------------------------------------------------------------------------------------------------------------------------------------------------------------------------------------------------------------------------------------------------------------------------------------------------------------------------------------------------------------------------------------------------------------------------------------------------------------------------------------------------------------------------------------------------------------------------------------------------------------------------------------------------------------------------------------------------------------------|---------|
| CENTRAL            | <p>(<i>"coronavirus"</i> OR <i>"coronavirus"</i> OR <i>"covid 2019"</i> OR <i>"SARS2"</i> OR <i>"SARS-CoV-2"</i> OR <i>"SARS-CoV-19"</i> OR <i>"novel cov"</i> OR <i>"2019ncov"</i> OR <i>"sars cov2"</i> OR <i>"cov22"</i> OR <i>"ncov"</i> OR <i>"covid-19"</i> OR <i>"covid19"</i> OR <i>"coronaviridae"</i> OR <i>"corona virus"</i>) in All Fields<br/> AND (<i>"vaccine"</i> OR <i>"vaccination"</i> OR <i>vaccination</i> OR <i>vaccin*</i>) in All Fields<br/> AND (<i>"cancer"</i> OR <i>"malignancy"</i> OR <i>"malign**"</i> OR <i>"immunocompromise"</i> OR <i>"immunocompromised"</i> OR <i>"immunodeficiency"</i> OR <i>"immunodeficient"</i> OR <i>"immunodef**"</i> OR <i>"immunocompr**"</i> OR <i>"chemotherapy"</i> OR <i>"chemo**"</i> OR <i>"immunosuppressed"</i> OR <i>"immunosuppression"</i> OR <i>"immunosupp**"</i> OR <i>"rheumatology"</i> OR <i>"rheumatic"</i> OR <i>"rheum**"</i> OR <i>"autoimmune"</i> OR <i>"autoimmunity"</i> OR <i>"transplant"</i> OR <i>"solid organ"</i> OR <i>steroids</i> OR <i>antineoplastic agents</i> OR <i>chemotherapy</i> OR <i>cytotoxicity</i> OR <i>immunologic</i> OR <i>antirheumatic agents</i> OR <i>immunosuppressive agents</i> or <i>steroid*</i> or <i>corticosteroid*</i> or (<i>antineoplastic*</i> AND <i>agent*</i>) OR <i>chemotherap*</i> or <i>cytotoxic*</i>) in All Fields<br/> All filters activated</p> <p>Search limits: 1 December 2020 to 5 November 2021</p>                                                                                                                                                                                                                                                                                                                                                                                                                                                                                 | 201     |
| MedLine via PubMed | <p>(<i>"coronavirus"</i>[MeSH] OR <i>"coronavirus"</i>[All Fields] OR <i>"covid 2019"</i>[All Fields] OR <i>"SARS2"</i>[All Fields] OR <i>"SARS-CoV-2"</i>[All Fields] OR <i>"SARS-CoV-19"</i>[All Fields] OR <i>"novel cov"</i>[All Fields] OR <i>"2019ncov"</i>[All Fields] OR <i>"sars cov2"</i>[All Fields] OR <i>"cov22"</i>[All Fields] OR <i>"ncov"</i>[All Fields] OR <i>"covid-19"</i>[All Fields] OR <i>"covid19"</i>[All Fields] OR <i>"coronaviridae"</i>[All Fields] OR <i>"corona virus"</i>[All Fields])<br/> AND<br/> (<i>"vaccine"</i>[MeSH] OR <i>"vaccination"</i>[MeSH] OR <i>vaccine</i>[All Fields] OR <i>vaccination</i>[All Fields] OR <i>vaccin*</i>[All Fields])<br/> AND<br/> (<i>"cancer"</i>[MeSH] OR <i>"cancer"</i> OR <i>"malignancy"</i> OR <i>"malign**"</i> OR <i>"immunocompromise"</i>[All Fields] OR <i>"immunocompromised"</i>[All Fields] OR <i>"immunodeficiency"</i>[All Fields] OR <i>"immunodeficient"</i>[All Fields] OR <i>"immunodef**"</i>[All Fields] OR <i>"immunocompr**"</i>[All Fields] OR <i>"chemotherapy"</i>[All Fields] OR <i>"chemo**"</i>[All Fields] OR <i>"immunosuppressed"</i>[All Fields] OR <i>"immunosuppression"</i>[All Fields] OR <i>"immunosupp**"</i>[All Fields] OR <i>"rheumatology"</i>[All Fields] OR <i>"rheumatic"</i>[All Fields] OR <i>"rheum**"</i>[All Fields] OR <i>"autoimmune"</i>[All Fields] OR <i>"autoimmunity"</i>[All Fields] OR <i>"transplant"</i>[All Fields] OR <i>"solid organ"</i>[All Fields] OR <i>steroids</i>[MeSH] OR <i>antineoplastic agents</i>[MeSH] OR <i>chemotherapy</i>[MeSH] OR <i>cytotoxicity</i>[MeSH] OR <i>immunologic</i>[MeSH] OR <i>antirheumatic agents</i>[MeSH] OR <i>immunosuppressive agents</i>[MeSH] or <i>steroid*</i> or <i>corticosteroid*</i> or (<i>antineoplastic*</i> AND <i>agent*</i>) OR <i>chemotherap*</i> or <i>cytotoxic*</i>)</p> <p>Search limits: 1 December 2020 to 5 November 2021</p> | 3411    |

|        |                                                                                                                                                                                                                                                                                                                                                                                                                                                                                                                                                                                                                                                                                                                                                                                                                                             |      |
|--------|---------------------------------------------------------------------------------------------------------------------------------------------------------------------------------------------------------------------------------------------------------------------------------------------------------------------------------------------------------------------------------------------------------------------------------------------------------------------------------------------------------------------------------------------------------------------------------------------------------------------------------------------------------------------------------------------------------------------------------------------------------------------------------------------------------------------------------------------|------|
| EMBASE | <p>( 'coronavirinae'/exp OR 'coronavirinae' OR 'coronaviridae infection'/exp OR 'coronaviridae infection' OR 'coronavirus disease 2019'/exp OR 'coronavirus'/exp OR coronavirus OR 'coronavirus infection'/de)</p> <p>AND</p> <p>('vaccination'/exp OR vaccine OR vaccination OR vaccin*)</p> <p>AND</p> <p>('cancer' OR 'malignancy' OR 'immunocom*' OR 'immunodef*' OR 'immunosupp*' OR 'immunomod*' OR 'immunocompromised patient'/exp OR 'immune deficiency'/exp OR 'malignant neoplasm'/exp OR 'chemotherapy'/exp OR 'autoimmune disease'/exp OR 'steroid*' OR 'transplant'/exp OR 'solid organ' OR 'immunosuppressive agent'/exp OR 'rheumatic disease'/exp OR immunosuppressed OR rheumatic OR rheumatoid OR autoimmune OR 'autoimmunity'/exp)</p> <p>NOT [medline]/lim</p> <p>Search limits: 1 December 2020 to 5 November 2021</p> | 1507 |
|--------|---------------------------------------------------------------------------------------------------------------------------------------------------------------------------------------------------------------------------------------------------------------------------------------------------------------------------------------------------------------------------------------------------------------------------------------------------------------------------------------------------------------------------------------------------------------------------------------------------------------------------------------------------------------------------------------------------------------------------------------------------------------------------------------------------------------------------------------------|------|

**Supplementary table 2: Trial characteristics**

| Source                 | Vaccine                                                   | n, Population(s) of interest                                                                                                                                                                                | Age†                                                                   | Gender‡                                                        | Country/R egion | n, Comparison         | Immunoassay                                                             | Threshold for positive response       | Endpoints of data collection         |
|------------------------|-----------------------------------------------------------|-------------------------------------------------------------------------------------------------------------------------------------------------------------------------------------------------------------|------------------------------------------------------------------------|----------------------------------------------------------------|-----------------|-----------------------|-------------------------------------------------------------------------|---------------------------------------|--------------------------------------|
| <b>Solid cancers</b>   |                                                           |                                                                                                                                                                                                             |                                                                        |                                                                |                 |                       |                                                                         |                                       |                                      |
| Monin et al, 2021 (a)* | BNT162b2 (mRNA)                                           | 95, solid cancer<br>Women's: 33 (35%)<br>Urological: 15 (16%)<br>Skin: 12 (13%)<br>Thoracic: 21 (22%)<br>Gastrointestinal: 12 (13%)<br>Head and neck: 1 (1%)<br>Glioblastoma: 1 (1%)                        | Patients: 73.0 (64.5-79.5) (All patients)<br>Control: 40.5 (31.3-50.0) | Patients: 78/151 (48%) (All patients)<br>Controls: 28/54 (52%) | UK              | 54, healthy controls  | Multiple assays in conjunction                                          | Multiple assays in conjunction        | 3 weeks and 5 weeks after first dose |
| Terpos et al, 2021 (a) | BNT162b2 (mRNA), mRNA-1273 (mRNA), AZD1222 (Viral vector) | 59, cancer patients on checkpoint inhibitors<br>Lung: 16 (27.1%)<br>Bladder: 15 (25.4%)<br>Kidney: 11 (18.6%)<br>Uterine: 5 (8.5%)<br>Pancreatic: 3 (5.1%)<br>Others: 8 (13.6%)                             | Patients: 66 (61-76)<br>Controls: 64 (59-82)                           | Patients: 36/59 (61.0%)<br>Controls: NIL                       | NIL             | 283, healthy controls | cPass SARS-CoV-2 NAb's Detection Kit, GenScript                         | Positive serology: NAb titres of ≥30% | 22 days after first dose             |
| Palich et al, 2021 (a) | BNT162b2 (mRNA)                                           | 110, Cancer<br>Breast: 37 (34%)<br>Lung: 15 (14%)<br>Gynaecological: 15 (14%)<br>Prostate: 11 (10%)<br>Digestive: 8 (7.3%)<br>Kidney: 7 (6.4%)<br>Bladder: 5 (4.5%)<br>Upper aero-digestive tract: 6 (5.5%) | Patients: 66 (54-74)<br>Controls: 55 (38-62)                           | Patients: 66/110<br>Controls: 18/25                            | France          | 25, healthy controls  | Abbott SARS-CoV-2 IgG chemiluminescent microparticle immunoassay (CMIA) | Positive serology: >50 UA/ml          | 4 weeks after 1st dose               |

|                         |                 |                                                                                                                                                                                                                                                              |                                                  |                                                     |        |                      |                                                                                                                      |                                                                               |                                                                                                                                           |
|-------------------------|-----------------|--------------------------------------------------------------------------------------------------------------------------------------------------------------------------------------------------------------------------------------------------------------|--------------------------------------------------|-----------------------------------------------------|--------|----------------------|----------------------------------------------------------------------------------------------------------------------|-------------------------------------------------------------------------------|-------------------------------------------------------------------------------------------------------------------------------------------|
|                         |                 | Thyroid: 5 (4.5%)<br>Others: 3 (2.7%)                                                                                                                                                                                                                        |                                                  |                                                     |        |                      |                                                                                                                      |                                                                               |                                                                                                                                           |
| Palich et al, 2021 (b)  | BNT162b2 (mRNA) | 223, solid cancers<br><br>Breast: 88 (40%)<br>Digestive: 36 (16%)<br>Lung: 31 (14%)<br>Gynaecologic: 24 (11%)<br>Prostate: 9 (4%)<br>Bladder: 8 (3.6%)<br>Pancreas: 8 (3.6%)<br>Kidney: 6 (2.7%)<br>Upper aero-digestive tract: 6 (2.7%)<br>Others: 7 (3.1%) | Patients: 67 (60-75)<br><br>Controls: 53 (47-60) | Patients: 81/223 (36%)<br><br>Controls: 17/49 (35%) | France | 49, healthy controls | Abbott IgG anti-SARS-CoV-2 Alinity system, and Roche Elecsys SARS-CoV-2 total Ig electrochemiluminescent immunoassay | Abbott positive serology: >50 UA/ml<br><br>Roche positive serology: >0.8 U/mL | 3-4 weeks after 2nd dose (a mean of 25 days between 2nd dose and serology for SCs, a mean of 7 days between 2nd dose and serology of HVs) |
| Massarweh et al, 2021   | BNT162b2 (mRNA) | 102, adult patients with solid tumors undergoing active intravenous anticancer treatment<br><br>Gastrointestinal: 29 (28%)<br>Lung: 26 (25%)<br>Breast: 18 (18%)<br>Brain: 9 (9%)<br>Genitourinary: 8 (8%)<br>Others: 12 (12%)                               | Patients: 66 (56-72)<br><br>Controls: 62 (49-70) | Patients: 58 (57%)<br><br>Controls: 23 (32%)        | Israel | 78, healthy controls | SARS-CoV-2 IgG II Quant assay (Abbott Laboratories Diagnostics)                                                      | Positive serology: >50 AU/mL                                                  | Median time of 38 (patient group) or 40 days (control) after 2nd dose                                                                     |
| Eliakim-Raz et al, 2021 | BNT162b2 (mRNA) | 95, adult patients with solid tumors undergoing active intravenous anticancer treatment<br><br>Gastrointestinal: 25 (26%)<br>Lung: 24 (25%)<br>Breast: 17 (18%)<br>Brain: 9 (9%)                                                                             | Patients: 65 (56-72)<br><br>Controls: 62 (50-70) | Patients: 55/95 (58%)<br><br>Controls: 21/66 (32%)  | Israel | 66, healthy controls | ARCHITECT® i2000sr Abbott Diagnostics                                                                                | Positive serology: > 50 AU/mL.                                                | 4 months after 2nd dose                                                                                                                   |

| Genitourinary: 8 (8%)<br>Others: 12 (13%) |                                                           |                                                                                                                                                                                                                                                                                 |                                                                                                        |                                                           |        |                       |                                                                       |                                         |                                                                                                              |
|-------------------------------------------|-----------------------------------------------------------|---------------------------------------------------------------------------------------------------------------------------------------------------------------------------------------------------------------------------------------------------------------------------------|--------------------------------------------------------------------------------------------------------|-----------------------------------------------------------|--------|-----------------------|-----------------------------------------------------------------------|-----------------------------------------|--------------------------------------------------------------------------------------------------------------|
| Goshen-Lago et al, 2021                   | BNT162b2 (mRNA)                                           | 232 patients receiving active treatment for cancer<br><br>Gastrointestinal: 63 (27%)<br>Breast: 42 (18%)<br>Genitourinary: 48 (21%)<br>Gynaecologic: 11 (5%)<br>Head and neck: 11 (5%)<br>Lung: 45 (19%)<br>Melanoma: 5 (2%)<br>Neurologic: 5 (2%)<br>Sarcoma: 2 (1%)           | Patients: 68 (range: 25-88)<br>mean(sd): 66 (12.09)<br><br>Controls: 64 (25-81)<br>mean(sd): 59 (15.7) | Patient: 132/232 (57%)<br><br>Controls: 18/261 (45%)      | Israel | 261, healthy controls | LIAISON SARS-CoV-2 S1/S2 IgG chemiluminescent assay (DiaSorin S.p.A.) | Positive serology: > 15 AU/mL           | >10 days after 1st dose<br><br>14 days after 2nd dose<br><br>Repeated 4 weeks after the 2nd dose if negative |
| Linardo u et al, 2021                     | BNT162b2 (mRNA), mRNA-1273 (mRNA), AZD1222 (Viral vector) | 189, solid cancer patients<br><br>Breast: 51<br>Lung (NSCLC): 37<br>Mesothelioma: 1<br>H&N: 1<br>Stomach: 6<br>Pancreatic: 11<br>Colorectal: 27<br>Ovarian: 11<br>Other gynaecological: 1<br>Bladder: 4<br>Prostate: 4<br>Kidney: 4<br>Testicular: 1<br>Melanoma: 3<br>Other: 7 | Patients: 46.4% >60 years old<br><br>Controls: 64% >60 years old                                       | Patients: 124/288 (43.1%)<br><br>Controls: 87/189 (46.0%) | Greece | 99, healthy controls  | LIAISON SARS-CoV-2 S1/S2 IgG chemiluminescent assay (DiaSorin S.p.A.) | Positive serology: >33.8 BAU/mL         | 2-4 weeks after 2nd dose                                                                                     |
| Liontos et al, 2021 (a)                   | BNT162b2 (mRNA), mRNA-1273 (mRNA),                        | 36, breast cancer patients                                                                                                                                                                                                                                                      | Patients: 64 (51-72)<br><br>Controls: 63 (60-78)                                                       | All females                                               | Greece | 160, healthy controls | cPass SARS-CoV-2 NAbS Detection Kit, GenScript                        | Positive serology: Nab titre $\geq$ 30% | 22 days after 1st dose<br><br>1 month after 2nd dose                                                         |

| AZD1222<br>(Viral vector) |                                                           |                                                                                                                                                               |                                                                       |                                                            |        |                       |                                                                       |                                                   |                                                                                                    |
|---------------------------|-----------------------------------------------------------|---------------------------------------------------------------------------------------------------------------------------------------------------------------|-----------------------------------------------------------------------|------------------------------------------------------------|--------|-----------------------|-----------------------------------------------------------------------|---------------------------------------------------|----------------------------------------------------------------------------------------------------|
| Liontos et al, 2021 (b)   | BNT162b2 (mRNA), mRNA-1273 (mRNA), AZD1222 (Viral vector) | 25, prostate cancer patients                                                                                                                                  | Patients: of 71(67–76)<br><br>Controls: 74 (64–83)                    | All males                                                  | Greece | 100, healthy controls | cPass SARS-CoV-2 NAbs Detection Kit, GenScript                        | Positive serology: Nab titre $\geq$ 30%           | 3 weeks after 1st dose<br><br>3–4 weeks post 2nd dose for mRNA / 7 weeks post 1st dose for AZD1222 |
| Rahav et al, 2021 (c)     | BNT162b2 (mRNA)                                           | 90, Solid cancer                                                                                                                                              | 64 (53-73)                                                            | 44 (49.4%)                                                 | Israel | 272, healthy controls | VSV-spike SARS-CoV-2 pseudo-virus neutralisation assay (Gert Zimmer)  | Positive serology: RBD: 1.1 were defined positive | 30 days after 2nd dose                                                                             |
| Agbarya et al, 2021       | BNT162b2 (mRNA)                                           | 140, patients with solid tumors<br><br>GI: 48 (34.2%)<br>Breast: 30 (21.4%)<br>Lung: 27 (19.3%)<br>Gynae: 9 (6.4%)<br>Others: 13 (9.3%)                       | Patients: Mean (sd): 65.3 (1.4)<br><br>Controls: Mean (sd): 62.5 (13) | Patients: 76/140 (54%)<br><br>Controls: 80/140 (37.2%)     | Israel | 215, healthy controls | SARS-CoV-2 IgG II Quant assay (Abbott)                                | Positive serology: >150AU/mL                      | At least 7 days after 2nd dose                                                                     |
| Di Noia et al, 2021       | BNT162b2 (mRNA)                                           | 816, patients with solid tumors<br><br>Breast: 250 (30.6%)<br>Lung: 168 (20.6%)<br>Melanoma<br>GI: 70 (8.6%)<br>Gynae: 46 (5.6%)<br>Genitourinary: 89 (10.9%) | Patients: Median (range): 62 (21-97)<br><br>Controls are age-matched. | Patients: 333/816 (40.8%)<br><br>Controls are sex-matched. | Italy  | 274, healthy controls | LIAISON SARS-CoV-2 S1/S2 IgG chemiluminescent assay (DiaSorin S.p.A.) | Positive serology: >15AU/mL                       | 3 weeks after 1st dose<br><br>4 weeks after 2nd dose                                               |

|                       |                 |                                                                                                                                                                                             |                                                                                                             |                                                                                          |        |                                                        |                                                                                                                                                     |                               |                                                      |
|-----------------------|-----------------|---------------------------------------------------------------------------------------------------------------------------------------------------------------------------------------------|-------------------------------------------------------------------------------------------------------------|------------------------------------------------------------------------------------------|--------|--------------------------------------------------------|-----------------------------------------------------------------------------------------------------------------------------------------------------|-------------------------------|------------------------------------------------------|
|                       |                 | Sarcoma: 54 (6.6%)<br>Head-Neck: 9 (1.1%)<br>Cerebral: 3 (0.4%)<br>NE tumor: 7 (0.9%)                                                                                                       |                                                                                                             |                                                                                          |        |                                                        |                                                                                                                                                     |                               |                                                      |
| Grinshpun et al, 2021 | BNT162b2 (mRNA) | 202, cancer patients on active treatment<br><br>Breast: 66 (32.7%)<br>Lung: 38 (18.8%)<br>GI: 36 (17.8%)<br>Genitourinary: 22 (10.9%)<br>Gynae: 10 (5%)<br>Others: 30 (14.9%)               | Patients: Mean (sd): 62.1 (14.1)<br>Controls: -                                                             | Patients: 89/202(44.1%)<br>Controls: -                                                   | Israel | 30, healthy controls                                   | LIAISON SARS-CoV-2 S1/S2 IgG chemiluminescent assay (DiaSorin S.p.A.)                                                                               | Positive serology: >19AU/mL   | Median of 77 days after 2nd dose                     |
| Iacono et al, 2021    | BNT162b2 (mRNA) | 36, patients with solid and haematological cancers<br><br>Haematologic: 10 (27.3%)<br>Solid: 26 (72.2%)<br>Genitourinary: 9 (25%)<br>GI: 8 (22.2%)<br>Breast: 7 (19.4%)<br>Others: 2 (5.5%) | Patients: Median (range): 82 (80-89)<br>Controls: -                                                         | Patients: 15/36 (58.4%)<br>Controls: -                                                   | Italy  | Number of controls not specified.                      | Abbott IgG anti-SARS-CoV-2 Alinity system                                                                                                           | Positive serology: >50AU/mL   | 1 month after 2nd dose                               |
| Shmueli et al, 2021   | BNT162b2 (mRNA) | 129, patients with solid tumor<br><br>GI: 55 (42.6%)<br>Breast: 26 (20.2%)<br>Lung: 19 (14.7%)<br>Melanoma: 14 (10.9%)<br>Genitourinary: 10 (7.8%)<br>Others: 5 (3.9%)                      | Patients: Mean(sd): 62.4 (12.81)<br>Controls (first dose): Mean (sd): 47.28 (12.33)<br>Controls (2nd dose): | Patients: 62/129 (58.1%)<br>Controls (first dose): 76/348 (21.8%)<br>Control (2nd dose): | Israel | 348, controls (first dose)<br>261, controls (2nd dose) | An enzyme-linked immunosorbent assay (ELISA) that detects IgG (immunoglobulin G) antibodies against the RBD (receptor-binding domain) of SARS-CoV-2 | Positive serology: $\geq 1.1$ | 2-4 weeks after 1st dose<br>2-4 weeks after 2nd dose |



|                               |                                                                     |                                                                                                                                                                         |                                                                                      |                                                                                |        |                                                                      |                                                |                                 |                                                                     |
|-------------------------------|---------------------------------------------------------------------|-------------------------------------------------------------------------------------------------------------------------------------------------------------------------|--------------------------------------------------------------------------------------|--------------------------------------------------------------------------------|--------|----------------------------------------------------------------------|------------------------------------------------|---------------------------------|---------------------------------------------------------------------|
|                               |                                                                     |                                                                                                                                                                         | Mean (sd):<br>55.84<br>(14.34)                                                       | 66/261<br>(25.3%)                                                              |        |                                                                      |                                                |                                 |                                                                     |
| Shroff et al, 2021            | Patients:<br>BNT162b2<br><br>Controls:<br>BNT162b2<br>and mRNA-1273 | 52, patients with solid tumor on immunosuppressive cancer therapy<br><br>TO ADD ON                                                                                      | Patients:<br>Mean (sd):<br>63.7 (9.14)<br><br>Controls:<br>Mean (sd):<br>41.3 (17.1) | Patients:<br>10/52<br>(19.2%)<br><br>Controls:<br>17/50<br>(34%)               | USA    | 50, healthy controls                                                 | ELISA for RBD                                  | Not stated                      | 5-9 days after 2nd dose                                             |
| Zagouri et al, 2021           | BNT162b2 (mRNA), mRNA-1273 (mRNA), AZD1222 (Viral vector)           | 21, breast cancer patients                                                                                                                                              | Patients: 63 (46-76)<br><br>Controls: 68 (58-82)                                     | -                                                                              | Greece | 160, healthy controls                                                | cPass SARS-CoV-2 NAbs Detection Kit, GenScript | Positive serology: > 30%        | 22 days after 2nd dose                                              |
| Barriere et al, 2021          | BNT162b2 (mRNA)                                                     | 122, patients with active treatment for solid tumors at w3-4<br><br>42, patients with active treatment for solid tumor at w6-8                                          | Patients:<br>69.5 (44-90)<br><br>Controls:<br>53 (21-81)                             | Patients:<br>64/122<br>(52.5%)<br><br>Controls:<br>NIL                         | France | 13, healthy volunteers at w3-4<br><br>29, healthy volunteers at w6-8 | Elecsys® Anti-SARS-CoV-2immunoassay            | Positive serology: ≥ 0.8 UI/ ml | During the booster (w3-w4) and 3-4 weeks after the booster (w6-w8). |
| <b>Haematological cancers</b> |                                                                     |                                                                                                                                                                         |                                                                                      |                                                                                |        |                                                                      |                                                |                                 |                                                                     |
| Monin et al, 2021 (b)*        | BNT162b2 (mRNA)                                                     | 56, haematological cancer<br><br>Mature B-cell neoplasm: 38 (68%)<br>Mature T-cell neoplasm: 5 (9%)<br>Myeloid and acute leukemia neoplasms: 10 (18%)<br>Others: 3 (5%) | Patients:<br>73.0 (64.5-79.5) (All patients)<br><br>Control:<br>40.5 (31.3-50.0)     | Patients:<br>78/151<br>(48%) (All patients)<br><br>Controls:<br>28/54<br>(52%) | UK     | 54, healthy controls                                                 | Multiple assays in conjunction                 | Multiple assays in conjunction  | 3 weeks and 5 weeks after first dose                                |

|                       |                 |                                                                                                                                                                                                                                   |                                                                                                                                       |                                                                                            |        |                       |                                                                                 |                                     |                           |
|-----------------------|-----------------|-----------------------------------------------------------------------------------------------------------------------------------------------------------------------------------------------------------------------------------|---------------------------------------------------------------------------------------------------------------------------------------|--------------------------------------------------------------------------------------------|--------|-----------------------|---------------------------------------------------------------------------------|-------------------------------------|---------------------------|
| Herishanu et al, 2021 | BNT162b2 (mRNA) | 167, Chronic lymphocytic leukemia (CLL) / small lymphocytic leukemia                                                                                                                                                              | Patient: 71.0 (63.0-76.0)<br>Controls are age- and sex-matched                                                                        | Patients: 112/167 (67.1%)                                                                  | Israel | 52, healthy controls  | Elecsys Anti-SARS-CoV-2 S assay on the cobas e 601 (Roche Diagnostics) analyzer | Positive serology: $\geq 0.80$ U/mL | 2-3 weeks after 2nd dose  |
| Pimpini et al, 2021   | BNT162b2 (mRNA) | 42, multiple myeloma (45.7%)<br>50, myeloproliferative malignancies (54.3%)                                                                                                                                                       | Multiple myeloma: Median (range): 73 (47-78)<br>Myeloproliferative: Median (range): 70 (28-80)<br>Control: Median (range): 81 (79-87) | Multiple myeloma: 23/42 (54.7%)<br>Myeloproliferative: 26/50 (52%)<br>Control: 18/36 (50%) | Italy  | 36, healthy controls  | LIAISON SARS-CoV-2 S1/S2 IgG chemiluminescent assay, DiaSorin                   | Positive serology: $\geq 15$ AU/mL  | 3 weeks after 1st dose    |
| Tzarfati et al, 2021  | BNT162b2 (mRNA) | 315 patients with haematologic malignancies<br>Aggressive Non-Hodgkin's Lymphoma (NHL): 51 (16%)<br>Indolent NHL: 40 (13%)<br>Hodgkin lymphoma: 16 (5%)<br>Multiple myeloma: 53 (17%)<br>CLL: 34 (11%)<br>Acute leukemia: 15 (5%) | Patients: 71 (61-78)<br>Controls: 69 (58-74)                                                                                          | Patients: 176/315 (56%)<br>Controls: 47/108 (44%)                                          | Israel | 108, healthy controls | LIAISON SARS-CoV-2 S1/S2 IgG chemiluminescent assay, DiaSorin                   | Positive serology: $\geq 12$ AU/ml  | 32-33 days after 2nd dose |

|                    |                                         |                                                                                                                                                                                                                                                                                                                                                                    |                                                                        |                                                |        |                      |                                                                                                    |                                                                                                                                          |                                                          |
|--------------------|-----------------------------------------|--------------------------------------------------------------------------------------------------------------------------------------------------------------------------------------------------------------------------------------------------------------------------------------------------------------------------------------------------------------------|------------------------------------------------------------------------|------------------------------------------------|--------|----------------------|----------------------------------------------------------------------------------------------------|------------------------------------------------------------------------------------------------------------------------------------------|----------------------------------------------------------|
|                    |                                         | Myelodysplastic syndrome (MDS): 16 (5%)<br>Myeloproliferative neoplasm (MPN): 68 (22%)<br>Chronic myeloid leukemia (CML): 22 (7%)                                                                                                                                                                                                                                  |                                                                        |                                                |        |                      |                                                                                                    |                                                                                                                                          |                                                          |
| Malard et al, 2021 | BNT162b2 (mRNA)                         | 195, patients with haematologic malignancies<br><br><u>Lymphoid malignancies (136 (69.7%))</u><br>Acute lymphoblastic leukemia: 3 (1.5%)<br>NHL: 44 (22.6%)<br>Hodgkin lymphoma: 5 (2.6%)<br>CLL: 26 (13.3%)<br>Multiple myeloma: 52 (26.7%)<br>MGUS: 6 (3%)<br><br><u>Myeloid malignancies; 59 (30.3%)</u><br>AML: 31 (15.9%)<br>MDS: 10 (5.1%)<br>MPN: 18 (9.2%) | Patients: Median (range): 68.9 (21.5-91.7)<br><br>Controls: NIL        | Patients: 117/195 (60%)<br><br>Controls: NIL   | France | 30, healthy controls | SARS-CoV-2 IgG II Quant assay (Abbott Laboratories Diagnostics)                                    | Positive serology: $\geq$ 3100 UA/mL correlating with NAb > 30%                                                                          | 28 days after 1st dose<br><br>14 days after 2nd dose     |
| Parry et al, 2021  | BNT162b2 (mRNA), AZD1222 (Viral vector) | 299, patients with chronic lymphocytic leukemia                                                                                                                                                                                                                                                                                                                    | Patients: 69 (63-74)<br><br>Controls: <i>Controls are age-matched.</i> | Patients: 159/299 (53.2%)<br><br>Controls: NIL | UK     | 93, healthy controls | Roche Elecsys® electrochemiluminescence immunoassay (ECLIA)<br><br>Dried blood spot ELISA analysis | Roche Elecsys® electrochemiluminescence immunoassay (ECLIA)<br>Positive serology: $\geq$ 0.8 U/ml<br><br>Dried blood spot ELISA analysis | 5-6 weeks after 1st dose<br><br>2-3 weeks after 2nd dose |

|                                |                                                                    |                                                                                                                                                                                                                   |                                                                                  |                                                          |         |                       |                                                                          | Positive serology:<br>ratio of 1 or more.                                                        |                                  |
|--------------------------------|--------------------------------------------------------------------|-------------------------------------------------------------------------------------------------------------------------------------------------------------------------------------------------------------------|----------------------------------------------------------------------------------|----------------------------------------------------------|---------|-----------------------|--------------------------------------------------------------------------|--------------------------------------------------------------------------------------------------|----------------------------------|
| Chowdhury, 2021                | BNT162b2 (mRNA), AZD1222 (Viral vector)                            | 59, patients with chronic myeloid malignancy<br><br>CML: 12 (20.3%)<br>Essential thrombocythemia: 16 (27.1%)<br>Myelofibrosis (MF)/pre-fibrotic MF: 7 (11.9%)<br>Polycythemia vera: 11 (18.6%)<br>MDS: 13 (22.0%) | Patients: 62 (52-73)<br><br>Controls: NIL                                        | Patients: 27/59 (45.8%)<br><br>Controls: NIL             | UK      | 232, healthy controls | SARS-CoV-2 IgG II Quant assay (Abbott Laboratories Diagnostics)          | Positive serology: $\geq$ 50 AU/ml                                                               | Median of 34 days                |
| Gavriatopoulou et al, 2021 (a) | BNT162b2 (mRNA), AZD1222 (Viral vector)                            | 58, patients with Waldenstrom Macroglobulinemia (WM), Chronic Lymphocytic Leukemia (CLL) and Non-Hodgkin Lymphoma (NHL)<br><br>WM: 28 (48.3%)<br>CLL: 22 (37.9%)<br>NHL: 8 (13.8%)                                | Patients: Median (range): 75 (40-88)<br><br>Controls: Median (range): 75 (61-95) | Patients: 28/58 (48.3%)<br><br>Controls: 100/213 (46.9%) | Greece  | 213, healthy controls | cPass SARS-CoV-2 NAbs Detection Kit, GenScript                           | Positive serology: 30% and NAb titres $\geq$ 50% (clinically relevant viral inhibition) reported | 3 weeks after 1st dose           |
| Lindemann et al, 2021          | 111 comirnaty, 3 spikevax, 2 vaxzevria, 1 vaxzevria then comirnaty | 117, HSCT<br><br>Acute leukemia: 70<br>MDS: 18<br>MPN: 14<br>Lymphoma: 12<br>Other/ not specified: 3                                                                                                              | Patients: Median (range): 59 (21-77)<br><br>Controls: NIL                        | Patients: 56/117 (49.6%)                                 | Germany | 35, healthy controls  | Anti-SARS-CoV-2 IgG semi-quantitative ELISA (Euroimmun, Lübeck, Germany) | Antibody ratio of $\geq$ 1.1                                                                     | Median of 31 days after 2nd dose |
| Rahav et al, 2021 (a)          | BNT162b2 (mRNA)                                                    | 188 CLL/NHL, 187 multiple myeloma, 111 HSCT, 43 MDS                                                                                                                                                               | Patients: CLL/NHL: 69 (61-74)<br>MM: 66 (59-73)                                  | Patients: CLL/NHL: 102/188 (54.3%)                       | Israel  | 272, healthy controls | VSV-spike SARS-CoV-2 pseudo-virus neutralisation assay (Gert Zimmer)     | Positive serology: RBD: $>$ 1.1                                                                  | 30 days after 2nd dose           |

|                                 |                                         |                                                                                                                                                                             |                                                                          |                                                                                             |        |                       |                                                |                                    |                                                                                                                |
|---------------------------------|-----------------------------------------|-----------------------------------------------------------------------------------------------------------------------------------------------------------------------------|--------------------------------------------------------------------------|---------------------------------------------------------------------------------------------|--------|-----------------------|------------------------------------------------|------------------------------------|----------------------------------------------------------------------------------------------------------------|
|                                 |                                         |                                                                                                                                                                             | HSCT: 62<br>(49-70)<br>MDS: 73<br>(66-80)                                | MM:<br>117/187<br>(62.6%)<br><br>HSCT:<br>70/111<br>(63.1%)<br><br>MDS:<br>22/43<br>(51.2%) |        |                       |                                                |                                    |                                                                                                                |
| Marasco et al, 2021             | BNT162b2 and mRNA-1273 (mRNA)s          | 59 (22.4%) with aggressive B-cell lymphoma, 111 (42.2%) with indolent B-cell lymphoma or CLL, 33 (12.6%) HL, 52 (19.8%) MM and 8 (3%) T-cell lymphoma                       | Patients: 121 (46%)<br>≥ 65 years                                        | Patients: 140/263 (53.3%)                                                                   | Italy  | 167, healthy controls | Roche Elecsys Anti-SARS-CoV-2 S                | Not explicitly stated              | 4 weeks after 2nd dose                                                                                         |
| Gavriato poulou et al, 2021 (b) | BNT162b2 (mRNA), AZD1222 (Viral vector) | 106, patients with Waldenstrom macroglobulinemia                                                                                                                            | Patients: 73 (64-81)<br><br>Controls: 66 (62-82)                         | Patients: 46/106 (43%)<br><br>Controls 98/212 : (46%)                                       | Greece | 212, healthy controls | cPass SARS-CoV-2 NAbS Detection Kit, GenScript | >30% NAb                           | 22 days after 1st dose<br><br>50 days after 1st dose (3 weeks after 2nd BNT162b2 or 6 weeks after 1st AZD1222) |
| Terpos et al, 2021 (b)          | BNT162b2 (mRNA)                         | 132, patients with chronic lymphocytic leukemia/ lymphoma<br><br>Non-Hodgkin's lymphoma: 57 (43%)<br>Hodgkin's lymphoma: 22 (17%)<br>Chronic lymphocytic leukemia: 53 (40%) | Patients: Mean (sd): 64.6 (14.3)<br><br>Controls: Mean (sd): 69.8 (12.5) | Patients: 66/132 (50%)<br><br>Controls: 96/214 (44.9%)                                      | Greece | 214, healthy controls | cPass SARS-CoV-2 NAbS Detection Kit, GenScript | Seropositivity: NAb titres of ≥30% | Day 22 and 50 from first dose                                                                                  |

|                      |                                         |                                                                                                                                                                                                                 |                                                                          |                                                          |         |                       |                                                                                                                                                                                                                    |                                                                                            |                                                              |
|----------------------|-----------------------------------------|-----------------------------------------------------------------------------------------------------------------------------------------------------------------------------------------------------------------|--------------------------------------------------------------------------|----------------------------------------------------------|---------|-----------------------|--------------------------------------------------------------------------------------------------------------------------------------------------------------------------------------------------------------------|--------------------------------------------------------------------------------------------|--------------------------------------------------------------|
| Shem-Tov et al, 2021 | BNT162b2 (mRNA)                         | 152, allogeneic hemotopoetic stem cell transplant recipients<br><br>AML: 68 (44.7%)<br>MDS: 23 (15.1%)<br>MPD: 16 (10.5%)<br>ALL: 12 (7.9%)<br>NHL: 24 (15.8%)<br>HL: 6 (3.9%)<br>CLL: 2 (1.3%)<br>AA: 1 (0.7%) | Patients: Mean (sd): 58.4 (14.0)<br><br>Controls: Mean (sd): 55.6 (14.2) | Patients: 96/152 (63.2%)<br><br>Controls: 66/272 (24.3%) | Italy   | 272, healthy controls | enzyme-linked immunosorbent assay (ELISA) that detects immunoglobulin G (IgG) antibodies against the receptor-binding domain (RBD) of SARS-CoV-2.9,10                                                              | Positive serology: titres > 1.1                                                            | 2–4 weeks after the 2nd dose after 2nd dose                  |
| Sherman et al, 2021  | mRNA- 1273 or BNT162b2                  | 20, allogeneic stem cell transplant recipients                                                                                                                                                                  | Patients: 66<br><br>Controls: 24                                         | Patients: 10/20 (50%)<br><br>Controls: 11/24 (45.8%)     | USA     | 24, healthy controls  | anti-SARS-CoV-2 S total antigen-capture (IgG, IgA, IgM) immunoassays on the cobas c602 (Roche Diagnostics, Indianapolis, IN)                                                                                       | Positive serology: $\geq$ 0.8 U/mL                                                         | About 28 days after 2nd dose                                 |
| Peeters et al, 2021  | BNT162b2 (mRNA)                         | 41, patients with hematological malignancies                                                                                                                                                                    | Patients: Mean (sd): 61.2 (11.5)<br><br>Controls: Mean (sd): 46.8 (10.2) | Patients: 24/41 (58.5%)<br><br>Controls: 11/40 (27.5%)   | Belgium | 40, healthy controls  | ELISA for quantitative detection of immunoglobulin G (IgG) antibody levels to SARS-CoV-2 receptor-binding domain (RBD) antigen                                                                                     | Threshold for high responders: 200 IU/mL                                                   | 28 days after booster dose                                   |
| Lim et al, 2021      | BNT162b2 (mRNA), AZD1222 (Viral vector) | 129, patients with lymphoma                                                                                                                                                                                     | Patients: 69 (57-74)<br><br>Controls: 45 (34-47)                         | Patients: 48/150 (37%)<br><br>Controls: 100/150 (67%)    | UK      | 150, healthy controls | IgG antibodies against SARS-CoV-2 spike (S), receptor binding domain (RBD), and nucleocapsid (N) antigens were measured using a qualified electrochemiluminescent assay (Meso Scale Discovery, Rockville, MD, USA) | Anti-S IgG concentrations of 0.55 BAU/mL or lower were below the lower limit of detection. | 2 weeks after the first dose or 2–4 weeks after the 2nd dose |

|                      |                                    |                                                                   |                                                                                                          |                                                     |         |                       |                                                                                            |                                                                                                        |                                                                                                  |
|----------------------|------------------------------------|-------------------------------------------------------------------|----------------------------------------------------------------------------------------------------------|-----------------------------------------------------|---------|-----------------------|--------------------------------------------------------------------------------------------|--------------------------------------------------------------------------------------------------------|--------------------------------------------------------------------------------------------------|
| Ghione et al, 2021   | BNT162 b2 (mRNA), mRNA-1273 (mRNA) | 86, patients with B-cell lymphoma                                 | Patients: Median (range): 70 (35-91)<br>Controls: Data not found                                         | Patients: 45/86 (52.3%)<br>Controls: Data not found | USA     | 201, healthy controls | KSL chemiluminescence immunoassays (CLIA) to detect anti-RBD antibodies                    | Positive serology: Value is greater than 1.0 COI                                                       | 2 to 8 weeks after the final dose of the vaccine                                                 |
| Stampfer et al, 2021 | mRNA-1273 or BNT162 b2             | 103, patients with active multiple myeloma                        | Patients: Median (range): 68 (35-88)<br>Controls: Median (range): 61 (26-85)                             | Patients: 61/103 (59.2%)<br>Controls: 12/31 (38.7%) | USA     | 31, healthy controls  | ELISA assay developed in own laboratory                                                    | No response (<50 IU/mL), partial response (50-250 IU/mL), and clinically relevant response >250 IU/mL) | Following their first (12-21 days after dosing) and 2nd (14-21 days following vaccination) doses |
| Canti et al, 2021    | BNT162b2 (mRNA)                    | 37, allogeneic hematopoietic stem cell transplantation recipients | Patients: Median (range): 60 (26-76)<br>Controls: Median (range): 48 (23-64)                             | Patients: 19/21 (90.5%)<br>Controls: 11/40 (27.5%)  | Belgium | 40, healthy controls  | WANTAI (Beijing Wantai Biological Pharmacy Enterprise, Beijing, China) SARS-Cov-2 Ab ELISA | Not stated                                                                                             | Day 21 and 49 post-vaccination                                                                   |
| Bitoun et al, 2021   | BNT162b2                           | 27, multiple myeloma                                              | Age: Responder s: Median (range): 69 (46-93)<br>Non-responders: Median (range): (74 (47-86)<br>Controls: | Patients: 12/27 (44.4%)<br>Controls: 8/28 (28.6%)   | France  | 28, healthy controls  | Elecsys Anti- SARS-CoV-2 Cobas, Roche Diagnostics<br>iFlash-2019-nCoV Nab assay, Yhlo      | Roche: 0.4 IU/mL<br>Yhlo: 24 IU/mL                                                                     | 1 month after 2nd dose                                                                           |

Median  
(range): 58  
(26-88)

**Organ transplant**

|                         |                              |                                                                                            |                                                                                       |                                                                 |         |                                                     |                                                                                                                                |                                                           |                           |
|-------------------------|------------------------------|--------------------------------------------------------------------------------------------|---------------------------------------------------------------------------------------|-----------------------------------------------------------------|---------|-----------------------------------------------------|--------------------------------------------------------------------------------------------------------------------------------|-----------------------------------------------------------|---------------------------|
| Yi et al, 2021          | BNT162b2 (mRNA) or mRNA-1273 | 145, Kidney transplant                                                                     | NIL                                                                                   | NIL                                                             | NIL     | 31, waitlisted patients with chronic kidney disease | Presence of anti-SARS-CoV-2 immunoglobulin (IgG) and total antibody, anti-SARS-CoV-2 nucleocapsid IgG, and antispike IgG titre | Seroconversion rate definitions not explicit.             | Before 2nd dose           |
| Grupper et al, 2021 (a) | BNT162b2 (mRNA)              | 136, kidney transplants                                                                    | Patients:<br>Mean (sd):<br>58.6 (12.7)<br><br>Controls:<br>Mean (sd):<br>52.7 (11.5)  | Patients:<br>111/136 (8<br>1.6%)<br><br>Controls:<br>8/25 (32%) | NIL     | 25, healthy controls                                | LIAISON SARS-CoV-2 S1/S2 IgG chemiluminescent assay, DiaSorin                                                                  | Positive serology: ≥15 AU/mL were considered as positive. | 10-20 days after 2nd dose |
| Rabinowich et al, 2021  | BNT162b2 (mRNA)              | 80, liver transplant                                                                       | Patients:<br>Mean (sd):<br>60.1 (12.8)<br><br>Controls:<br>Mean (sd):<br>63.22 (11.9) | Patients:<br>24/80 (30%)<br><br>Controls:<br>17/25 (68%)        | Israel  | 25, healthy controls                                | LIAISON SARS-CoV-2 S1/S2 IgG chemiluminescent assay, DiaSorin                                                                  | Positive serology: ≥15 AU/ml                              | 10–20 days after 2nd dose |
| Mazzola et al, 2021     | BNT162b2 (mRNA)              | 133, solid organ transplant with negative covid at baseline<br>143, solid organ transplant | Patients: 61 (55-67)<br><br>Controls: 55 (38-62)                                      | Patients: 102/143 (71.3%)<br><br>Controls: 7/25 (22%)           | France  | 25, healthy controls                                | Chemiluminescent microparticle immunoassays (CMIA)<br>Anti-spike response                                                      | Positive serology: 50.0 AU/ml                             | 28 days after 2nd dose    |
| Sattler et al, 2021     | BNT162b2 (mRNA)              | 39, kidney transplant                                                                      | Patients:<br>Mean (sd):<br>57.38 (14.04)                                              | Patients:<br>28/39 (71.8%)                                      | Germany | 39, healthy controls                                | ELISA-based analysis of SARS-CoV-2 spike S1 domain-specific IgG and IgA (EUROIMMUN).                                           | Positive serology: OD ratios of greater than 1.1          | 7-9 days after 2nd dose   |



|                        |                                     |                                                                           |                                                                     |                                                        |                                        |                                                                |                                                                 |                                                                                                                                                      |                                              |
|------------------------|-------------------------------------|---------------------------------------------------------------------------|---------------------------------------------------------------------|--------------------------------------------------------|----------------------------------------|----------------------------------------------------------------|-----------------------------------------------------------------|------------------------------------------------------------------------------------------------------------------------------------------------------|----------------------------------------------|
|                        |                                     |                                                                           | Controls:<br>Mean (sd):<br>53.03<br>(17.58)                         | Controls:<br>20/39<br>(51.3%)                          |                                        |                                                                |                                                                 |                                                                                                                                                      |                                              |
| Marinaki et al, 2021   | BNT162b2 (mRNA)                     | 34, solid organ transplant (10 kidney, 24 heart)                          | Patients: 60 (49.1-68.4)<br><br>Controls: Age- and sex-matched      | Controls: 27/34 (79.4%)                                | NIL - study investigators from Greece; | 116, healthy                                                   | Anti-SARS-CoV-2-RBD IgG assay (Abbott SARS-CoV-2 IgG II Quant). | Positive serology: ≥50 AU/ml                                                                                                                         | Median of 10 days from 2nd dose              |
| Miele et al, 2021      | BNT162b2 (mRNA)                     | 16, solid organ transplant recipient (5 kidney, 5 lung, 4 liver, 2 heart) | Patients: Mean (sd): 57 (15.9)<br><br>Controls: Mean (sd): 44 (7.2) | Patients: 13/16 (81.2%)<br><br>Controls: 10/23 (43.5%) | Italy                                  | 23, healthy                                                    | LIAISON SARS-CoV-2 S1/S2-IgG chemiluminescent assay, (DiaSorin) | Positive serology: ≥15 AU/ml                                                                                                                         | at least 15 days after 2nd dose              |
| Peled et al, 2021      | BNT162b2 (mRNA)                     | 77, Heart transplant recipient                                            | Patients: 62 (49-68)<br><br>Controls: Mean (sd): 63 (13)            | Patients: 50/77 (64%)<br><br>Controls: 50/136 (37%).   | Israel                                 | 136, healthy                                                   | In-house assay, anti-RBD IgG                                    | Anti-RBD IgG<br><br>Positive serology: Not reported                                                                                                  | 3 weeks after 2nd dose                       |
| Narasimhan et al, 2021 | BNT162b2 (mRNA) or mRNA-1273 (mRNA) | 73, lung transplant recipients                                            | Median: 65 (53.5-69.5)<br><br>Controls: NIL                         | Patients: 54/73 (74%)<br><br>Controls: NIL             | USA                                    | 49, non-transplanted and not had previous SARS-CoV-2 infection | Abbott IgG anti-SARS-CoV-2 Alinity system                       | No comparison of seropositivity between intervention and control group given, only comparison of seroconversion rates between and mRNA-1273 (mRNA)s. | Approximately 3 weeks following the 2nd dose |

|                              |                                     |                                                    |                                                                     |                                                       |         |                           |                                                     |                                         |                                                                                        |
|------------------------------|-------------------------------------|----------------------------------------------------|---------------------------------------------------------------------|-------------------------------------------------------|---------|---------------------------|-----------------------------------------------------|-----------------------------------------|----------------------------------------------------------------------------------------|
| Rashidi-Alavijeh et al, 2021 | BNT162b2 (mRNA)                     | 43 liver transplant (LT) recipients                | Patients: 57 (49-64)<br>Controls: 43.5 (38-53.5)                    | Patients: 26/43 (60.5%)<br>Controls: 9/20 (45%)       | Germany | 20, healthcare workers    | LIAISON SARS-CoV-2 TrimericS IgG kit                | Positive serology: $\geq 13.0$ AU/mL    | Median time after 2nd dose: 13 days for controls and 15 days for transplant recipients |
| Schramm et al, 2021          | BNT162b2 (mRNA)                     | 50, cardiothoracic transplant patients             | Patients: Mean (sd): 55 (10)<br>Controls: Mean (sd): 47 (10)        | Patients: 32/50 (64%)<br>Controls: 17/50 (34%)        | Germany | 50, healthy staff members | Abbott, Euroimmun and Roche Elecsys Immunoassays    | Positive serology: $\geq 7.1$ BAU/ml    | 21 days after 2nd dose                                                                 |
| Stumpf et al, 2021           | BNT162b2 (mRNA) or mRNA-1273 (mRNA) | 144, kidney transplant recipients                  | Patients: Mean (sd): 57.3 (13.7)<br>Controls: Mean (sd): 48 (11.9)  | Patients: 241/368 (65.5%)<br>Controls: 34/144 (23.6%) | Germany | 55, medical personnels    | Euroimmun ELISAs on Euroimmun analyzers             | Seroconversion definition not explicit. | 3-4 week after 1st dose                                                                |
| Rincon-Arevalo et al, 2021   | BNT162b2 (mRNA)                     | 40, kidney transplant recipients                   | Patients: 62.4 (51.25-69.5)<br>Controls: 51 (34-80)                 | Patients: 28/40 (70%)<br>Controls: 20/35 (57.1%)      | Germany | 35, healthy controls      | Euroimmun enzyme-linked immunosorbent assay (ELISA) | Seroconversion definition not explicit. | 7 $\pm$ 2 days after boost vaccination (2nd dose),                                     |
| Korth et al, 2021            | BNT162b2 (mRNA)                     | 23, renal transplant recipients                    | Patients: Mean (sd): 57.7 (13.5)<br>Controls: Mean (sd): 44.4 (9.2) | Patients: 11/23 (48%)<br>Controls: 9/23 (39%)         | Germany | 23, healthy controls      | LIAISON SARS-CoV-2 TrimericS IgG kit                | Positive serology: $\geq 13.0$ AU/mL    | 14 days after 2nd dose                                                                 |
| Rahav et al, 2021 (d)        | BNT162b2 (mRNA)                     | 36 liver, 111 kidney, 80 heart transplant patients | Liver: 68.0 (51.0 to 71.0)                                          | Patients: Liver: 19 (52.8%)                           | Israel  | 272, healthy              | VSV-spike SARS-CoV-2 pseudo-virus                   | Positive serology: RBD: $>1.1$          | 30 days after 2nd dose                                                                 |

|                          |                                                               |                                  |                                                                                            |                                                                 |          |                      |                                                                                  |                                                                                                    |                                        |
|--------------------------|---------------------------------------------------------------|----------------------------------|--------------------------------------------------------------------------------------------|-----------------------------------------------------------------|----------|----------------------|----------------------------------------------------------------------------------|----------------------------------------------------------------------------------------------------|----------------------------------------|
|                          |                                                               |                                  | Kidney: 60.0 (49.0 to 70.0)<br>Heart: 61.5 (50.0 to 68.0)<br>Controls: 63.0 (51.0 to 72.0) | Kidney:88 (79.3%)<br>Heart: 55 (68.8%)<br>Controls: 654 (65.3%) |          |                      | neutralisation assay (Gert Zimmer)                                               |                                                                                                    |                                        |
| Predecki et al, 2021 (b) | BNT162b2 (mRNA), AZD1222 (mRNA)                               | 768, kidney transplant           | Patients: 59 (Median)<br>Controls: 42.8 (Median)                                           | Patients: 65.7%<br>Controls: 37.%                               | UK       | 40, healthy          | SARS-CoV-2 IgG II Quant assay (Abbott Laboratories Diagnostics)                  | 7.1 BAU/ml                                                                                         | 31 days after 2nd dose                 |
| Ruether et al 2021       | BNT162b2, mRNA-1273 and AZD1222 vaccines                      | 141, liver transplant            | Patients: Mean (sd): 53.8 (9.5)<br>Controls: Mean (sd): 50.9 (11.6)                        | Patients: 79 (57.2%) male<br>Controls: 19 (36.5%) male          | Germany  | 52, healthy          | DiaSorin LIAISON XL anti-SARS-CoV-2 TrimericS IgG ChemiLumi- nescent ImmunoAssay | 33.8 BAU/mL                                                                                        | Median 29 days after 2nd dose          |
| Bruminhent et al, 2021   | CoronaVac (Inactivated)                                       | 37, kidney transplant recipients | Patients: 50 (42-54)<br>Controls: -                                                        | Patients: 21/35 (60%)<br>Controls: -                            | Thailand | 38, healthy controls | Abbott SARS-CoV-2 IgG II Quantification assay                                    | Those with anti-RBD antibody levels of > 50 AU/mL were characterized as having a seroconversion.14 | 2 weeks after 2nd dose                 |
| Crespo et al, 2021       | Moderna mRNA-1273 or Pfizer BNT162b2 SARS-CoV-2 mRNA vaccines | 90, kidney transplant recipients | Patients: Mean (sd): 59.7 (13.9)<br>Controls: Mean (sd): 52.7 (10.7)                       | Patients: 35/90 (38.9%)<br>Controls: 27/32 (84.4%)              | Spain    | 32, healthy controls | LIAISON SARS-CoV-2 TrimericS IgG kit                                             | Values reached $\geq 13.0$ AU/ml were considered positive.                                         | 28 (+/- 3 days) from last vaccine dose |

|                            |                                              |                                                   |                                                                      |                                                       |             |                       |                                                                                                                                                                     |                                                                                                                                           |                                                |
|----------------------------|----------------------------------------------|---------------------------------------------------|----------------------------------------------------------------------|-------------------------------------------------------|-------------|-----------------------|---------------------------------------------------------------------------------------------------------------------------------------------------------------------|-------------------------------------------------------------------------------------------------------------------------------------------|------------------------------------------------|
| D'Offizi et al, 2021       | BNT162b2 or mRNA-1273 anti-SARS-CoV2 vaccine | 61, liver transplant recipients                   | Patients: 59 (56-61)<br>Controls: 43 (36-53)                         | Patients: 43/61 (70%)<br>Controls: 13/51 (25.5%)      | Italy       | 51, healthy controls  | ARCHITECT® i2000sr Abbott Diagnostics, Chicago, IL, USA                                                                                                             | Positive serology: $\geq 7.2$ Binding Arbitrary Units (BAU)/mL.                                                                           | 2 weeks after 2nd dose                         |
| Danthu et al, 2021         | Pfizer/BioNTech (BNT162b2) mRNA vaccine      | 74, kidney transplant recipients                  | Patients: Mean (sd): 64.8 (11.5)<br>Controls: Mean (sd): 51.6 (6.8)  | Patients: 44/74 (59.5%)<br>Controls: 4/7 (57.1%)      | France      | 7, healthy controls   | LIAISON SARS-CoV-2 TrimericS IgG                                                                                                                                    | Positive serology: $>13$ AU/mL                                                                                                            | 36 days after 1st dose (8 days after 2nd dose) |
| Debska-Slizien et al, 2021 | BNT162b2 (mRNA), mRNA-1273 (mRNA)            | 142, infection-naive kidney transplant recipients | Patients: 54 (43-63)<br>Controls: 48 (45-62)                         | Patients: 83/142 (58.45%)<br>Controls: 21/142 (58.3%) | Switzerland | 36, healthy controls  | LIAISON SARS-CoV-2 TrimericS IgG kit                                                                                                                                | Positive serology: $>12$ AU/mL                                                                                                            | 14–21 days following the 2nd one               |
| Grupper et al, 2021 (b)    | BNT162b2 (mRNA)                              | 109, kidney transplant recipients                 | Patients: Mean (sd): 57 (12.9)<br>Controls: Mean (sd): 53 (10.9)     | Patients: 69/109 (67%)<br>Controls: 6/39 (41.0%)      | Israel      | 39, healthy controls  | LIAISON SARS-CoV-2 S1/S2 IgG chemiluminescent assay                                                                                                                 | Positive serology: $>15$ AU/mL                                                                                                            | At least 1 month after the 2nd dose            |
| Hod et al, 2021            | BNT162b2 (mRNA)                              | 120, kidney transplant recipients                 | Patients: Mean (sd): 59.7 (13)<br>Controls: Mean (sd): 57.04 (13.55) | Patients: 96/120 (80%)<br>Controls: 141/202 (69.8%)   | Israel      | 202, healthy controls | Enzyme-linked immunosorbent assay (ELISA) that detects IgG antibodies against the RBD of SARS-CoV-2 and SARS-CoV-2 pseudovirus (psSARS-2) neutralization assay (NA) | Positive serology: RBD IgG $\geq 1.1$ and the presence of NA capable of reducing viral replication by 50% at a 16-fold dilution or above. | 2–4 wk following the 2nd vaccine dose          |

|                          |                                                           |                                   |                                                                      |                                                     |         |               |                                                |                                   |                                                                                  |
|--------------------------|-----------------------------------------------------------|-----------------------------------|----------------------------------------------------------------------|-----------------------------------------------------|---------|---------------|------------------------------------------------|-----------------------------------|----------------------------------------------------------------------------------|
| Kantauskaite et al, 2021 | BNT162b2 (mRNA), mRNA-1273 (mRNA)                         | 225, kidney transplant recipients | Patients: 62 (54–70)<br>Controls: 60 (54–69)                         | Patients: 146/225 (64.8%)<br>Controls: 65/176 (37%) | Germany | 176, controls | Anti-SARS-CoV-2-QuantiVac-ELISA (Euroimmun AG) | Positive serology: > 35.2 BAU/ ml | 14 ± 2 days and 17 days post vaccination in KTRs and control group respectively. |
| Schmidt et al, 2021      | BNT162b2 (mRNA), mRNA-1273 (mRNA), AZD1222 (Viral vector) | 40, transplant recipients         | Patients: Mean (sd): 54.5 (12.7)<br>Controls: Mean (sd): 50.6 (11.9) | Patients: 22/40 (55%)<br>Controls: 21/70 (30%)      | Germany | 70, controls  | Anti-SARS-CoV-2-QuantiVac-ELISA (Euroimmun)    | Positive serology: ≥35.2 BAU/ml   | Median 14 days after 2nd dose                                                    |

#### IMID

|                   |                 |                                                                                                                                                                                                                                                                                                                                                          |                                                                              |                                                       |        |                       |                                        |                            |                                  |
|-------------------|-----------------|----------------------------------------------------------------------------------------------------------------------------------------------------------------------------------------------------------------------------------------------------------------------------------------------------------------------------------------------------------|------------------------------------------------------------------------------|-------------------------------------------------------|--------|-----------------------|----------------------------------------|----------------------------|----------------------------------|
| Furer et al, 2021 | BNT162b2 (mRNA) | 686, auto-immune inflammatory rheumatic diseases<br><br>Rheumatoid arthritis (RA): 263<br>Psoriatic arthritis: 165<br>Axial spondyloarthritis: 68<br>Systemic lupus erythematosus (SLE): 101<br>Idiopathic inflammatory myositis: 19<br>Large vessel vasculitis: 21<br>Antineutrophil antibody (ANCA)- associated vasculitis: 26<br>Other vasculitis: 23 | Patients: Median (range): 59 (19-88)<br>Controls: Median (range): 50 (18-90) | Patients: 211/686 (30.7%)<br>Controls: 43/121 (35.5%) | Israel | 121, healthy controls | LIAISON (DiaSorin) quantitative assay. | Positive serology: ≥15 BAU | 2-6 weeks after the vaccine dose |
|-------------------|-----------------|----------------------------------------------------------------------------------------------------------------------------------------------------------------------------------------------------------------------------------------------------------------------------------------------------------------------------------------------------------|------------------------------------------------------------------------------|-------------------------------------------------------|--------|-----------------------|----------------------------------------|----------------------------|----------------------------------|

|                          |                                   |                                                                                                                                                                                                                                                                                                                                                                                                                                                                                                                 |                                                 |                                           |             |                      |                                                                                                                                                                                |                                                 |                                                 |
|--------------------------|-----------------------------------|-----------------------------------------------------------------------------------------------------------------------------------------------------------------------------------------------------------------------------------------------------------------------------------------------------------------------------------------------------------------------------------------------------------------------------------------------------------------------------------------------------------------|-------------------------------------------------|-------------------------------------------|-------------|----------------------|--------------------------------------------------------------------------------------------------------------------------------------------------------------------------------|-------------------------------------------------|-------------------------------------------------|
| Rubbert-Roth et al, 2021 | BNT162b2 (mRNA), mRNA-1273 (mRNA) | 53, rheumatoid arthritis on DMARDs                                                                                                                                                                                                                                                                                                                                                                                                                                                                              | NIL                                             | NIL                                       | Switzerland | 20, healthy controls | Roche Elecsys Anti-SARS-CoV-2 spike subunit 1 (S1) assay                                                                                                                       | Positive serology: $\geq 15$ U/mL               | 3 weeks after first dose and 2 weeks after dose |
| Deepak et al, 2021       | BNT162b2 (mRNA), mRNA-1273 (mRNA) | 133, chronic inflammatory disease<br>Inflammatory bowel disease: 42 (31.6%)<br>RA: 38 (28.6%)<br>Spondyloarthritis: 20 (15%)<br>Uveitis: 5 (3.8%)<br>SLE: 15 (11.3%)<br>Other connective tissue disease: 4 (3%)<br>Sjogren's syndrome: 8 (6%)<br>Vasculitis: 5 (3.8%)<br>Autoinflammatory syndrome: 2 (1.5%)<br>Multiple sclerosis: 9 (6.8%)<br>Neuromyelitis optica: 1 (0.8%)<br>IgG4-related disease: 2 (1.5%)<br>Hidradenitis suppurativa: 1 (0.8%)<br>HIV: 1 (0.8%)<br>Anti-phospholipid syndrome: 1 (0.8%) | Patients: Mean (sd): 45.5 (16)<br>Controls: NIL | Patients: 34/133 (25.6%)<br>Controls: NIL | US          | 53, healthy controls | anti-S IgG quantification using ELISA, ELISpot assays to quantify recombinant S protein-binding IgG-secreting cells.<br><br>Neutralization assays: fluorescence-based platform | Seroconversion definition not explicit.         | 1-2 weeks after 2nd dose                        |
| Achiron et al, 2021 (a)  | BNT162b2 (mRNA)                   | 125, multiple sclerosis                                                                                                                                                                                                                                                                                                                                                                                                                                                                                         | Patients: Data separated into subgroups         | Patients: 53/125 (42.4%)                  | Israel      | 47, healthy controls | anti-spike protein-based serology (EUROIMMUN)                                                                                                                                  | Positive serology: Index value of 1.1 or higher | 1 month after 2nd dose                          |

|                     |                                                                |                                                                                                                                                                                                                                                  |                                                                                      |                                                                   |         |                      |                                                                                                                                                    |                                                                                   |                                                                               |
|---------------------|----------------------------------------------------------------|--------------------------------------------------------------------------------------------------------------------------------------------------------------------------------------------------------------------------------------------------|--------------------------------------------------------------------------------------|-------------------------------------------------------------------|---------|----------------------|----------------------------------------------------------------------------------------------------------------------------------------------------|-----------------------------------------------------------------------------------|-------------------------------------------------------------------------------|
|                     |                                                                |                                                                                                                                                                                                                                                  | Controls:<br>54.3 (43.1-<br>61.9)                                                    | Controls:<br>17/47<br>(36.1%)                                     |         |                      |                                                                                                                                                    |                                                                                   |                                                                               |
| Geisen et al, 2021  | BNT162 b2 (mRNA), mRNA-1273 (mRNA)                             | 26, chronic inflammatory disease<br><br>Psoriatic arthritis: 2<br>Psoriasis: 4<br>RA: 8<br>MCTD: 1<br>Spondyloarthritis: 3<br>Crohn's: 2<br>Crohn's/Multiple sclerosis: 1<br>Giant cell vasculitis: 1<br>SLE: 2<br>Myositis: 1<br>Sarcoidosis: 1 | Patients:<br>Mean (sd):<br>50.5 (15.8)<br><br>Controls:<br>Mean (sd):<br>37.5 (13.4) | Patients:<br>(9/26)<br>35.7%<br><br>Controls:<br>13/42<br>(30.8%) | Germany | 42, healthy controls | IgG antibodies against SARS-CoV-2 were quantified by ELISA according to manufacturer's protocol (EUROIMMUN QuantiVac).                             | Seroconversion data not available, and definition of seroconversion not explicit. | 7 days after 2nd dose                                                         |
| Izmirly et al, 2021 | BNT162 b2 (mRNA), mRNA-1273 (mRNA), Ad26.COV2.S (Viral vector) | 90, SLE patients                                                                                                                                                                                                                                 | Patients:<br>Mean (sd):<br>45.5 (14.2)<br><br>Controls:<br>Mean (sd):<br>45.3 (14.2) | Patients:<br>11/90<br>(12.2%)<br><br>Controls:<br>8/20<br>(40%)   | US      | 20, healthy controls | IgG seroreactivity to the SARS-CoV-2 spike receptor-binding domain (RBD) and SARS-CoV-2 microneutralization were used to evaluate B cell responses | Seroconversion data not available, and definition of seroconversion not explicit. | Median of 23 or 24 days between 2nd vaccine dose and post- vaccine blood draw |
| Mahil et al, 2021   | BNT162 b2 (mRNA)                                               | 84, patients with psoriasis<br><br>77, patients with psoriasis receiving immunosuppressants                                                                                                                                                      | Controls & Patients:<br>43 (31-52)<br><br>Controls:<br>34 (27-46)                    | Patients:<br>47/84<br>(56.0%)<br><br>Controls:<br>9/17 (53%)      | UK      | 17, healthy controls | ELISA                                                                                                                                              | Positive serology: EC50 value of 25 was used for anti-SARS-CoV-2 IgG titres       | 28 days after vaccination.                                                    |

|                                        |                                                                                           |                                                                                                                                                                                                                                                                                                                                                                                             | Patients<br>(reported in<br>subgroups)                                        |                                                                                     |         |                          |                                                                                                                                                                                                                               |                                                                                                              |                                                         |
|----------------------------------------|-------------------------------------------------------------------------------------------|---------------------------------------------------------------------------------------------------------------------------------------------------------------------------------------------------------------------------------------------------------------------------------------------------------------------------------------------------------------------------------------------|-------------------------------------------------------------------------------|-------------------------------------------------------------------------------------|---------|--------------------------|-------------------------------------------------------------------------------------------------------------------------------------------------------------------------------------------------------------------------------|--------------------------------------------------------------------------------------------------------------|---------------------------------------------------------|
| Medeiros-<br>Ribeiro<br>et al,<br>2021 | Corona<br>Vac<br>(Inacti-<br>ved)                                                         | 859, autoimmune<br>rheumatic diseases<br><br>Chronic inflammatory<br>arthritis (RA, psoriatic<br>arthritis, axial<br>spondyloarthritis): 451<br>(49.6%)<br><br>Other autoimmune<br>rheumatic disease (SLE,<br>primary vasculitis,<br>systemic sclerosis,<br>primary Sjogren;s<br>syndrome, idiopathic<br>inflammatory<br>myopathies, primary<br>anti-phospholipid<br>syndrome): 459 (50.4%) | Patients: 51<br>(40-60)<br><br>Controls:<br>50 (41-60)                        | Patients:<br>210/910<br>(23.1%)<br><br>Controls:<br>42/182<br>(23.1%)               | Brazil  | 179, healthy<br>controls | A chemiluminescent<br>immunoassay was used<br>to measure human IgG<br>antibodies against<br>proteins S1 and S2 in<br>the receptor-binding<br>domain (RBD) (Indirect<br>ELISA, LIAISON SARS-<br>CoV-2 S1/S2 IgG,<br>DiaSorin). | Positive serology:<br>≥15.0 UA/ml                                                                            | 28 days after 1st<br>dose and 69 days<br>after 2nd dose |
| Reuken<br>et al,<br>2021               | BNT162<br>b2<br>(mRNA)<br>, mRNA-<br>1273<br>(mRNA)<br>,<br>AZD122<br>2 (Viral<br>vector) | 28 patients with IBD<br>were included in the<br>analysis, among them 17<br>patients with Crohn's<br>disease (CD) and 10<br>patients with ulcerative<br>colitis (UC) and one with<br>not defined IBD.                                                                                                                                                                                        | Patients: 42<br>(36-59)<br><br>Controls:<br>NIL (age-<br>and sex-<br>matched) | Patients:<br>15/28<br>(53.6%)<br><br>Controls:<br>NIL (age-<br>and sex-<br>matched) | Germany | 27, healthy<br>controls  | LIAISON SARS-CoV-2<br>TrimericS IgG kit                                                                                                                                                                                       | Positive serology:<br>SARS-CoV-2-<br>specific trimeric<br>spike glycoprotein<br>≥13 AU/ml or ≥33.8<br>BAU/ml | 3 weeks after 1st<br>dose                               |
| Seyahi<br>et al,<br>2021               | Corona<br>Vac<br>(Inacti-<br>ved)                                                         | 104 patients with<br>immune-mediated<br>diseases<br><br>RA: 19 (18.3%)                                                                                                                                                                                                                                                                                                                      | Information<br>in its<br>subgroups<br>of hospital<br>workers                  | Patients:<br>35/104<br>(33.7%)                                                      | Turkey  | 347, healthy<br>controls | Elecsys® Anti-SARS-<br>CoV-2 assay (Roche<br>Diagnostics<br>International Ltd,<br>Rotkreuz, Switzerland)                                                                                                                      | antibodies against<br>receptor binding<br>domain of the S1<br>spike protein (anti-                           | 3 weeks after 2nd<br>dose                               |



|                      |                  |                                                                                                                                                                                                                                                                                   |                                                                                                                                 |                                                                                                    |     |                       |                               |                                                                 |                                                                                                           |
|----------------------|------------------|-----------------------------------------------------------------------------------------------------------------------------------------------------------------------------------------------------------------------------------------------------------------------------------|---------------------------------------------------------------------------------------------------------------------------------|----------------------------------------------------------------------------------------------------|-----|-----------------------|-------------------------------|-----------------------------------------------------------------|-----------------------------------------------------------------------------------------------------------|
|                      |                  | Connective tissue disease: 17 (16.3%)<br>Spondyloarthropathies: 24 (23.1%)<br>Behcet syndrome: 16 (15.4%)<br>Familial Mediterranean fever: 10 (9.6%)<br>Vasculitis: 7<br>IBD: 5 (4.8%)<br>Others: 6 (5.8%)                                                                        | and elderly population, unable to pool together.                                                                                | Controls: 130/347 (37.5%)                                                                          |     |                       |                               | spike SARS-CoV-2 IgG)<br><br>Positive serology: $\geq 0.8$ U/mL |                                                                                                           |
| Haberman et al, 2021 | BNT162 b2 (mRNA) | <u>25 patients with IMID on methotrexate</u><br>Psoriasis and/or psoriatic arthritis: 15 (57.7%)<br>RA: 10 (38.5%)<br>Others: 1 (3.8%)<br><br><u>26 patients with IMID not on treatment</u><br>Psoriasis and/or psoriatic arthritis: 9 (36%)<br>RA: 12 (48.0%)<br>Others: 4 (16%) | IMID on MTX:<br>Mean (sd): 63.2 (11.9)<br><br>IMID no MTX:<br>Mean (sd): 49.1 (14.9)<br><br>Controls:<br>Mean (sd): 49.2 (11.9) | IMID on MTX:<br>18/25 (72%)<br><br>IMID no MTX:<br>18/26 (69.2%)<br><br>Controls:<br>16/26 (61.5%) | USA | 26, healthy controls  | EUROIMMUN Analyzer I platform | Positive serology: 5000 units or greater                        | Healthy controls: 29.0 days (4.6)<br><br>IMID no MTX: 32.5 days (5.0)<br><br>IMID on MTX: 34.6 days (9.9) |
| Simon et al, 2021    | BNT162 b2 (mRNA) | 84 patients with various IMIDs and immunomodulatory therapy<br><br>Spondyloarthritis: 27 (32.1%)<br>RA: 25 (29.8%)<br>IBD: 8 (9.5%)<br>Psoriasis: 8 (9.5%)<br>Systemic: 16 (19.1%)                                                                                                | IMIDs:<br>Mean (sd): 53.1 (17.0)<br><br>Controls:<br>Mean (sd): 40.8 (12.0)                                                     | IMIDs:<br>29/84 (34.5%)<br><br>Controls:<br>78/182 (42.9%)                                         | USA | 182, healthy controls | EUROIMMUN Analyzer I platform | Positive serology: $\geq 0.8$ (OD 450 nm)                       | At least 10 days after vaccination                                                                        |

|                                 |                                                              |                                                                                                                                                                                                        |                                                                                                                                                                     |                                                                                                                                                                     |        |                          |                                                                                                                              |                                                                                     |                                                                  |
|---------------------------------|--------------------------------------------------------------|--------------------------------------------------------------------------------------------------------------------------------------------------------------------------------------------------------|---------------------------------------------------------------------------------------------------------------------------------------------------------------------|---------------------------------------------------------------------------------------------------------------------------------------------------------------------|--------|--------------------------|------------------------------------------------------------------------------------------------------------------------------|-------------------------------------------------------------------------------------|------------------------------------------------------------------|
| Predec<br>ki et al,<br>2021 (a) | BNT162<br>b2<br>(mRNA)<br>,<br>AZD122<br>2 (Viral<br>vector) | 119<br><br>ANCA-associated<br>vasculitis and anti-GBM<br>disease: 45 (37.8%)<br>Podocytopathy: 28<br>(23.5%)<br>Membranous<br>glomerulonephritis: 23<br>(19.3%)<br>SLE: 19 (16.0%)<br>Others: 4 (3.4%) | Data<br>stratified<br>according<br>to those<br>who<br>seroconvert<br>ed and who<br>did not,<br>hence<br>unable to<br>obtain data<br>for patient<br>and<br>controls. | Data<br>stratified<br>according<br>to those<br>who<br>seroconvert<br>ed and<br>who did<br>not, hence<br>unable to<br>obtain data<br>for patient<br>and<br>controls. | UK     | 70, healthy<br>controls  | Abbott Architect SARS-<br>CoV-2 IgG Quant II<br>CMIA                                                                         | 7.1 binding<br>antibody units<br>(BAU)/mL                                           | 28-40 days after<br>1st dose<br><br>18-29 days after<br>2nd dose |
| Achiron<br>et al,<br>2021 (b)   | BNT162b2<br>(mRNA)                                           | 414, multiple sclerosis                                                                                                                                                                                | Patients:<br>Data<br>reported in<br>treatment<br>subgroups,<br>and was<br>not pooled<br>together.<br><br>Control:<br>mean (sd):<br>53.5 (15.4)                      | Patients:<br>132/414<br>(31.9%)<br><br>Controls:<br>25/89<br>(28.1%)                                                                                                | Israel | 503, healthy<br>controls | ELISA kit based on the<br>recombinant S1 protein<br>from the SARS-COV-2<br>spike protein<br>(Euroimmun, Lubeck,<br>Germany). | Index values<br>(signal to cut-off<br>ratios) >1.1 were<br>considered positive<br>( | At least 28 days<br>after 2nd dose                               |
| Ali et al,<br>2021              | BNT162b2<br>(mRNA),<br>mRNA-1273<br>(mRNA)                   | 42, multiple sclerosis                                                                                                                                                                                 | Patients:<br>Data<br>reported in<br>subgroups,<br>and was<br>not pooled<br>together.<br><br>Controls:<br>Mean (sd):<br>41.6 (10.5)                                  | Patients:<br>32/42<br>(76.2%)<br><br>Controls:<br>32/42<br>(76.2%)<br><br>2/7<br>(28.6%)                                                                            | USA    | 7, healthy<br>controls   | Siemens SARS-CoV-2<br>Spike RBD total<br>antibody assay                                                                      | Index value > 1                                                                     | 3 weeks after 2nd<br>dose                                        |

|                       |                                                                                     |                                                                                                                                                                                                                                                                                                                                                                    |                                                                      |                                                                    |             |                       |                                       |            |                                                                                                                                       |
|-----------------------|-------------------------------------------------------------------------------------|--------------------------------------------------------------------------------------------------------------------------------------------------------------------------------------------------------------------------------------------------------------------------------------------------------------------------------------------------------------------|----------------------------------------------------------------------|--------------------------------------------------------------------|-------------|-----------------------|---------------------------------------|------------|---------------------------------------------------------------------------------------------------------------------------------------|
| Apostolis et al, 2021 | BNT162b2 (mRNA), mRNA-1273 (mRNA)                                                   | 20, multiple sclerosis                                                                                                                                                                                                                                                                                                                                             | Patients: Mean (sd): 40.35 (8.44)<br>Controls: Mean (sd): 35.2 (9.9) | Patients: 5/20 (25%)<br>Controls: 4/10 (40%)                       | USA         | 10, healthy controls  | Qiagen                                | Not stated | 25-30 days after 2nd dose                                                                                                             |
| Boekel et al, 2021    | BNT162b2 (mRNA), mRNA-1273 (mRNA), AZD1222 (Viral vector), Ad26.COVS (Viral vector) | 632, patients with autoimmune conditions<br>RA: 260 (41%)<br>Psoriatic arthritis: 68 (11%)<br>AS (68 (11%)<br>Axial or peripheral spondyloarthritis: 6 (1%)<br>Juvenile idiopathic arthritis 8 (1%)<br>SLE: 33 (5%)<br>Vasculitis: 11 (2%)<br>Polymyalgia rheumatica: 37 (6%)<br>Sjogren's syndrome: 33 (5%)<br>Other rheumatic diseases: 103 (16%)<br>MS: 58 (9%) | Patients: Mean (sd): 63 (11)<br>Controls: Mean (sd): 63 (11)         | Patients: 209/632 (33%)<br>Controls: 94/289 (33%)                  | Netherlands | 289, healthy controls | In-house ELISA Anti-RBD IgG           | Not stated | 1st dose: from 14 days after the first dose until 3 days after a second dose.<br><br>2nd dose: at least 7 days after the second dose. |
| Mrak et al, 2021      | BNT162b2 (mRNA), mRNA-1273 (mRNA)                                                   | 74, patients under rituximab treatment<br>2 (2.7%) IgG4-related disease, 22 (29.7%) connective tissue diseases, 33 (44.6%) RA, 17 (23%) vasculitis                                                                                                                                                                                                                 | Patients: 61.7 (13.3)<br>Patients and controls were age-matched..    | Patients: 17/74 (23.0%)<br>Patients and controls were sex-matched. | Austria     | 15, healthy controls  | Elecsys Anti-SARS-CoV-2 S immunoassay | Not stated | At a mean of 21.9days (range: 7–49 days) after the 2nd dose                                                                           |

|                    |                         |                                                  |                                                                      |                                                     |        |                       |                                                                        |                                |                         |
|--------------------|-------------------------|--------------------------------------------------|----------------------------------------------------------------------|-----------------------------------------------------|--------|-----------------------|------------------------------------------------------------------------|--------------------------------|-------------------------|
| Shinjo et al, 2021 | CoronaVac (Inactivated) | 53, patients with systemic autoimmune myopathies | Patients: Mean (sd): 50.7 (11.1)<br>Controls: Mean (sd): 50.5 (10.6) | Patients: 13/53 (24.5%)<br>Controls: 26/106 (24.5%) | Brazil | 106, healthy controls | Indirect ELISA, LIAISONVR<br><br>SARS-CoV-2 S1/S2 IgG, DiaSorin, Italy | Positive serology: >15.0 UA/ml | Day 28 after first dose |
|--------------------|-------------------------|--------------------------------------------------|----------------------------------------------------------------------|-----------------------------------------------------|--------|-----------------------|------------------------------------------------------------------------|--------------------------------|-------------------------|

## HIV

|                       |                        |                   |                                                                            |                                                       |              |                       |                                                                                                           |                                |                                                                                                                   |
|-----------------------|------------------------|-------------------|----------------------------------------------------------------------------|-------------------------------------------------------|--------------|-----------------------|-----------------------------------------------------------------------------------------------------------|--------------------------------|-------------------------------------------------------------------------------------------------------------------|
| Rahav et al, 2021 (b) | BNT162 b2 (mRNA)       | 156, HIV patients | Patients: 49 (42-57)                                                       | 137 (87.8%)                                           | Israel       | 272, healthy controls | VSV-spike SARS-CoV-2 pseudo-virus neutralisation assay (Gert Zimmer)                                      | Positive serology: RBD: >1.1   | 30 days after 2nd dose                                                                                            |
| Jedicke 2021, et al   | BNT162b2 (mRNA)        | 88, HIV patients  | Patients: Mean (range): 53.5 (26-86)<br>Controls: Mean (range): 44 (23-61) | Patients: 86/88 (97.7%)<br>Controls: 32/41 (78.0%)    | Germany      | 41, healthy controls  | ELISA (QuantiVac; Euroimmun, Lübeck, Germany)                                                             | Not explicitly stated          | Mean of 18.7 days (range 0–42 days) after the first and 35 days (range 1–128 days) after the boost vacci- nation. |
| Itzchak et al, 2021   | BNT162b2 (mRNA)        | 143, HIV patients | Patients: Mean (sd): 49.8 (11.6)<br>Controls: Mean (sd): 55.8 (14.3)       | Patients: 131/143 (91.6%)<br>Controls: 66/261 (25.3%) | Israel       | 261, healthy controls | ELISA that detects IgG antibodies against the receptor-binding domain (RBD) of SARS-CoV-2                 | Positive serology: $\geq$ 1.1  | 2-3 weeks following 2nd dose                                                                                      |
| Shabir et al, 2021    | AZD1222 (Viral vector) | 52, HIV patients  | Patients: 37 (32-45)<br>Controls: 34 (23-41)                               | Patients: 16/52 (31%)<br>Controls: 17/29 (59%)        | South Africa | 24, healthy controls  | Singleplex bead-based immunoassays were developed on the Luminex platform to quantitatively measure serum | Seropositive: >2-fold increase | Day 28 from first dose and 14 days post booster                                                                   |

|                                |                    |                  |                                               |                                                                                                                     |     |                         | IgG binding to FLS and RBD                                      |            |                                            |
|--------------------------------|--------------------|------------------|-----------------------------------------------|---------------------------------------------------------------------------------------------------------------------|-----|-------------------------|-----------------------------------------------------------------|------------|--------------------------------------------|
| Woldem<br>eskel et<br>al, 2021 | BNT162b2<br>(mRNA) | 12, HIV patients | Patients:<br>Median<br>(range):<br>52 (25-59) | Patients:<br>5/12<br>(41.7%)<br><br>Controls:<br>10/17<br>(58.8%)<br>Controls:<br>Median<br>(range): 41<br>(24-59): | USA | 17, healthy<br>controls | Euroimmun<br>Anti-SARS-CoV-2<br>immunoglobulin G (IgG)<br>ELISA | Not stated | Between 7 and 17<br>days after 2nd<br>dose |

\*Study reported data amongst both solid cancer and haematological cancer patients

†Reported as median (IQR) unless otherwise stated

‡Reported as percentage of males unless otherwise stated

**Supplementary table 3: Antibody titres after the first dose of COVID-19 vaccine**

| Source                                   | Outcome                   | n, compromised | Median, unless otherwise stated | IQR, unless otherwise stated | n, controls | Median, unless otherwise stated | IQR, unless otherwise stated | Fold difference (Control / compromised) | Endpoints of data collection                                       |
|------------------------------------------|---------------------------|----------------|---------------------------------|------------------------------|-------------|---------------------------------|------------------------------|-----------------------------------------|--------------------------------------------------------------------|
| <b>Solid cancers</b>                     |                           |                |                                 |                              |             |                                 |                              |                                         |                                                                    |
| Terpos et al, 2021                       | SARS-CoV-2 NAb inhibition | 59             | 22%                             | 13.4 to 30.2%                | 283         | 38%                             | 23 to 54%                    | 1.73                                    | 22 days after 1st dose                                             |
| Goshen-Lago et al, 2021                  | SARS-CoV-2 S1/S2 IgG      | 86             | 42.3 AU/mL                      | -                            | 261         | 72.0 AU/mL                      | -                            | 1.70                                    | 10 days after 1st dose                                             |
| Palich et al, 2021 (Dose 1) <sup>‡</sup> | SARS-CoV-2 anti-S IgG     | 64             | 359 UA/mL                       | 178 to 998 UA/mL             | 25          | 680 UA/mL                       | 360 to 930 UA/mL             | 1.89                                    | Median 27 (Immunocompromised) and 23 days (Healthy) after 1st dose |
| Liontos et al, 2021 (Prostate)           | NAb                       | 25             | 37%                             | 21 to 47%                    | 100         | 31%                             | 27 to 36%                    | -                                       | 22 days after 1st dose                                             |
| Liontos et al, 2021 (Ovarian)            | NAb                       | 36             | 20.0%                           | 5.5 to 31.9%                 | 160         | 42.5%                           | 28.1 to 58.7%                | -                                       | 22 days after 1st dose                                             |
| Zagouri et al, 2021                      | NAb                       | 18             | 39.5%                           | -                            | 160         | 42.83%                          | -                            | 1.08                                    | 22 days after 1st dose                                             |
| Di Noia et al, 2021                      | IgG                       | 206            | GMC: 23.32                      | 1.61 to 337.69               | 219         | 236.37                          | GMC: 13.77 to 4055.91        | 10.1                                    | 3 weeks after 1st dose                                             |
| Barriere et al, 2021                     | Anti-S antibodies         | 122            | 0.52 UI/ml                      | Range: 0 to 1962 UI/ml       | 13          | 21.6 UI/ml                      | Range: 3.26 to 723.2 UI/ml   | 41.5                                    | Week 3-4 after 1st dose                                            |

| Haematological cancers                                |                         |    |                                                 |                           |                              |                            |                                                     |                                  |                                     |
|-------------------------------------------------------|-------------------------|----|-------------------------------------------------|---------------------------|------------------------------|----------------------------|-----------------------------------------------------|----------------------------------|-------------------------------------|
| Chowdhury et al, 2021                                 | SARS-CoV-2 anti-S IgG   | 59 | 75 AU/mL                                        | 19 to 328 AU/mL           | 232                          | 630 AU/mL                  | 284 to 1328 AU/mL                                   | 8.4                              | At least 14 days after 1st dose     |
| Parry et al, 2021                                     | SARS-CoV-2 Spike IgG    | 86 | 0.4 U/mL                                        | -                         | 95                           | 41.6 U/mL                  | -                                                   | 104                              | Median 43 days after 1st dose       |
| Pimpinelli et al, 2021 (Multiple myeloma)             | SARS-CoV-2 S1/S2 IgG    | 42 | 7.5 AU/mL                                       | 95%CI: 5.6 to 10.4 AU/mL  | 36                           | 17.1 AU/mL                 | 95%CI: 12.0 to 24.1 AU/mL                           | 2.28                             | 21 days after 1st dose              |
| Pimpinelli et al, 2021 (Myeloproliferative neoplasms) | SARS-CoV-2 S1/S2 IgG    | 42 | 16.2 AU/mL                                      | 95%CI: 11.7 to 22.3 AU/mL | 36                           | 17.1 AU/mL                 | 95%CI: 12.0 to 24.1 AU/mL                           | 1.06                             | 21 days after 1st dose              |
| Sherman et al, 2021                                   | Anti-S1 IgG             | 20 | 0.91 normalized average enzymes per bead (nAEB) | -                         | 24                           | 21.22 nAEB                 | -                                                   | -                                | At the time of 2nd dose             |
| Gavriatopoulou (b)                                    | Neutralising antibodies | 90 | 28.2%                                           | 2.5%                      | 174                          | 41.3%                      | 1.8%                                                | -                                | Day 22 from 1st dose                |
| Peeters                                               | SARS-CoV-2 RBD-IgG      | 41 | GMT: 4                                          | -                         | 40                           | GMT: 287                   | -                                                   | 71.8                             | Day 21 from priming dose (1st dose) |
| Lim et al, 2021 (on treatment)                        | Anti-S IgG antibodies   | 33 | GMT: 2.5 BAU/mL                                 | 95% CI: 1.1 to 5.8 BAU/mL | BNT162b2 : 65<br>AZD1222: 20 | GMT: BNT162b2: 2339 BAU/mL | 95% CI: BNT162b2 : 40 to 111<br>AZD1222: 140 to 282 | BNT162b2: 935.6<br>AZD1222: 79.6 | 2-4 weeks after the second dose     |

|                                    |                           |     |                     |                                  |     |                      |                                  |                                 |                                 |  |
|------------------------------------|---------------------------|-----|---------------------|----------------------------------|-----|----------------------|----------------------------------|---------------------------------|---------------------------------|--|
|                                    |                           |     |                     |                                  |     | AZD1222: 199 BAU/mL  |                                  |                                 |                                 |  |
| Lim et al, 2021 (not on treatment) |                           | 30  | GMT: 141.8 BAU/mL   | 95% CI: 75.6 to 266.0 BAU/mL     |     |                      |                                  | BNT162b2: 16.5<br>ChAdOx1: 1.40 | 2–4 weeks after the second dose |  |
| Stampfer et al, 2021               | Anti-spike IgG            | 96  | Median: 11.58 IU/mL | Standard deviation: 297.25 IU/mL | 31  | Median: 117.25 IU/mL | Standard deviation: 584.38 IU/mL | 10.1                            | 12–21 days after 1st dose       |  |
| <b>IMID</b>                        |                           |     |                     |                                  |     |                      |                                  |                                 |                                 |  |
| Rubbert-Roth et al, 2021           | SARS-CoV-2 anti-S1 IgG    | 51  | 0.4 U/mL            | 0.4 to 2.13 U/mL                 | 20  | 99.2 U/mL            | 24.8 to 172 U/mL                 | 248                             | 3 weeks after 1st dose          |  |
| Medeiros-Ribeiro et al, 2021       | SARS-CoV-2 IgG            | 859 | 5.1 AU/mL           | 4.7 to 5.5 AU/mL                 | 179 | 10.3 AU/mL           | 8.5 to 12.5 AU/mL                | 2.02                            | 28 days after 1st dose          |  |
| Reuken et al, 2021                 | SARS-CoV-2 IgG            | 20  | 57.2 BAU/mL         | -                                | 23  | 105.0 BAU/mL         | -                                |                                 | 21 days after 1st dose          |  |
| Mahil et al, 2021                  | SARS-CoV-2 IgG            | 77  | 43                  | 25 to 162                        | 17  | 101                  | 55 to 200                        | 2.35                            | 28 days after 1st dose          |  |
| Prendecki et al, 2021 (IMID)       | anti-S                    | 119 | 0.61 BAU/mL         | 0.03 to 9.8 BAU/mL               | 79  | 90 BAU/mL            | 40.7 to 199.8 BAU/mL             | 147.54                          | 28-40 days after 1st dose       |  |
| Shinjo et al, 2021                 | anti-SARS-CoV-2 S1/S2 IgG | 37  | GMT: 3.3            | 95% CI: 2.5 to 4.3               | 79  | GMT: 9.6             | 95% CI: 7.2 to 12.9              | 2.91                            | 28 days after 1st dose          |  |



|                                                           |                          |                               |                                            |                                                       |              |                                            |                                                            |                                |                                                                     |
|-----------------------------------------------------------|--------------------------|-------------------------------|--------------------------------------------|-------------------------------------------------------|--------------|--------------------------------------------|------------------------------------------------------------|--------------------------------|---------------------------------------------------------------------|
| Boekel et al (d1), 2021<br>(rheumatoid arthritis)         | SARS-CoV-2 IgG           | 189                           | 2.1 AU/mL                                  | 0.56 to 0.88 AU/mL                                    | 210          | 8.1AU/mL                                   | 3.8 to 21.5AU/mL                                           | 2.08                           | 34 days (IQR 31–38) for patients and 36 days (34–41) after 1st dose |
| Boekel et al (d1), 2021<br>(ankylosing spondylitis)       |                          | 45                            | 7.5 AU/mL                                  | 3.1 to 19 AU/mL                                       |              |                                            |                                                            |                                |                                                                     |
| Boekel et al (d1), 2021<br>(systemic lupus erythematosus) |                          | 23                            | 7.7 AU/mL                                  | 2.3 to 50 AU/mL                                       |              |                                            |                                                            |                                |                                                                     |
| Boekel et al (d1), 2021<br>(multiple sclerosis)           |                          | 45                            | 4.0 AU/mL                                  | 0.83 to 17 AU/mL                                      |              |                                            |                                                            |                                |                                                                     |
| <b>Organ transplant</b>                                   |                          |                               |                                            |                                                       |              |                                            |                                                            |                                |                                                                     |
| Mazzola et al, 2021 <sup>‡</sup>                          | SARS-CoV-2 Anti-spike Ab | 9                             | 153 AU/mL                                  | 129 to 860                                            | Not reported | NIL                                        | NIL                                                        | NIL                            | 28 days after 1st dose                                              |
| Schramm et al, 2021                                       | SARS-CoV-2 IgG           | 50                            | (2 patients showed a response)             | -                                                     | 50           | 82 BAU/mL                                  | 41 to 149 BAU/mL                                           | NIL                            | 21 days after 1st dose                                              |
| Prendecki et al, 2021<br>(Transplant)                     | Anti-S                   | 768, infection-naive patients | BNT162b2: 34 BAU/mL<br>ChAdOx1: 7.1 BAU/mL | BNT162b2: 7.1 to 861 BAU/mL<br>AZD1222: 7.1-13 BAU/mL | 65           | BNT162b2: 815 BAU/mL<br>AZD1222: 88 BAU/mL | BNT162b2 : 318 to 2033 BAU/mL<br>AZD1222: 47 to 395 BAU/mL | BNT162b2: 24.0<br>ChAdOx: 12.4 | A median of 28 (controls) and 31 (patients) days after vaccination  |
| Bruminhent et al (d1), 2021                               | Anti-RBD IgG             | 35                            | 1.5 AU/mL                                  | 0.7 to 3.4 AU/mL                                      | 38           | 89.2 AU/mL                                 | 51.2 to 198.5 AU/mL                                        | 59.5                           | 4 weeks after 1st dose                                              |

|                           |                           |    |            |                     |    |              |                        |      |                                                         |
|---------------------------|---------------------------|----|------------|---------------------|----|--------------|------------------------|------|---------------------------------------------------------|
| D'Offizi et al (d1), 2021 | SARS-CoV-2 anti-Spike IgG | 61 | 1.7 BAU/mL | 0.47 to 9.12 BAU/mL | 51 | 100.2 BAU/mL | 54.70 to 231.60 BAU/mL | 58.9 | On day of 2nd dose (doses administered 3-4 weeks apart) |
| Canti et al (d1), 2021    | Anti-RBD SARS-CoV-2 IgG   | 37 | 6 IU/mL    | 2.5 to 77.5 IU/mL   | 40 | 385.4 IU/mL  | 148.2 to 554.7 IU/mL   | 64.2 | 3 weeks after 1st dose                                  |

### HIV

|                     |            |    |            |               |    |          |             |      |                                                            |
|---------------------|------------|----|------------|---------------|----|----------|-------------|------|------------------------------------------------------------|
| Jedicke et al, 2021 | Anti-S IgG | 88 | 18.7 RU/mL | 0 to 42 RU/mL | 41 | 20 RU/mL | 12-27 RU/mL | 1.07 | Mean of 18.7 days (range 0-42 days) after the priming dose |
|---------------------|------------|----|------------|---------------|----|----------|-------------|------|------------------------------------------------------------|

‡data was only reported amongst seropositive individuals

**Supplementary table 4: Antibody titres after a second dose of COVID-19 vaccine**

| Source                         | Outcome                   | n, compromised | Median, unless otherwise stated | IQR, unless otherwise stated | n, controls | Median, unless otherwise stated | IQR, unless otherwise stated | Fold difference (Control / compromised) | Endpoints of data collection                                                                                                                                  |
|--------------------------------|---------------------------|----------------|---------------------------------|------------------------------|-------------|---------------------------------|------------------------------|-----------------------------------------|---------------------------------------------------------------------------------------------------------------------------------------------------------------|
| <b>Solid cancers</b>           |                           |                |                                 |                              |             |                                 |                              |                                         |                                                                                                                                                               |
| Palich et al, 2021 (Dose 2)    | SARS-CoV-2 anti-Spike IgG | 111            | 252U/mL                         | -                            | 24          | 2517U/mL                        | -                            | 9.99                                    | 3-4 weeks after 2nd dose                                                                                                                                      |
| Massarweh et al, 2021          | SARS-CoV-2 IgG            | 102            | 1931 AU/mL                      | 509 to 4386 AU/mL            | 78          | 7160AU/mL                       | 3129 to 11241 AU/mL          | 3.71                                    | Median of 38 (patients) or 40 days (controls) after 2nd dose                                                                                                  |
| Eliakim-Raz et al, 2021        | SARS-CoV-2 anti-Spike IgG | 95             | 417 AU/mL                       | 136 to 895 AU/mL             | 66          | 1220 AU/mL                      | 588 to 1987 AU/mL            | 2.93                                    | Approx 4 months after 2nd dose                                                                                                                                |
| Linardou et al, 2021           | SARS-CoV-2 S1/S2 IgG      | 232            | 523 BAU/mL                      | Range: 4.81 to 2080 BAU/mL   | 100         | 2050 BAU/mL                     | Range: 4.81 to 2090 BAU/mL   | 3.92                                    | 2-4 weeks after 2nd dose                                                                                                                                      |
| Liontos et al, 2021 (Prostate) | NAb                       | 36             | 88%                             | 62 to 95%                    | 160         | 81%                             | 44 to 94%                    | NIL                                     | On day 22 (D22) (i.e., 3 weeks after vaccination) and on day 50 (3 or 4 weeks post 2nd dose for mRNA vaccines and 7 weeks post 1st dose for AZD1222 vaccine). |

|                               |                           |     |               |                             |     |               |                                   |        |                                                             |
|-------------------------------|---------------------------|-----|---------------|-----------------------------|-----|---------------|-----------------------------------|--------|-------------------------------------------------------------|
| Liontos et al, 2021 (Ovarian) | NAb                       | 25  | 83.6%         | 37.4 to 90.7%               | 100 | 92.9%         | 82.4 to 96.6%                     | NIL    | On day 22, and one month after the second vaccination dose. |
| Rahav et al, 2021             | RBD-IgG                   | 90  | GMT: 3.17     | 95%CI: 2.56 to 3.92         | 272 | GMT: 5.98     | 95%CI: 5.70 to 6.28               | 1.89   | 30 days after 2nd dose                                      |
| Shmueli et al, 2021           | RBD-IgG                   | 71  | GMT: 3.25     | 95% CI: 2.7 to 3.9          | 348 | GMT: 6.1      | 95% CI: 5.8 to 6.4                | 1.88   | 20 days (mean) after 2nd dose                               |
| Agbarya et al, 2021           | SARS-CoV-2 anti-Spike IgG | 140 | 2231 AU/mL    | 445 to 8023 AU/mL           | 215 | 4100 AU/mL    | 2231 to 6774 AU/mL                | 1.84   | At least 7 days from 2nd dose                               |
| Di Noia et al, 2021           | SARS-CoV-2 IgG            | 194 | GMC: 236.37   | 13.77 to 4055.91            | 204 | GMC: 262.98   | 101.42 to 681.96                  | 1.11   | 7 weeks after 1st dose (4 weeks after 2nd dose)             |
| Iacono et al, 2021            | SARS-CoV-2 IgG            | 36  | 2396,10 AU/ml | Range: 0 to 32,763,00 AU/mL | -   | 8737,49 AU/ml | Range: 398.90 to 976,280,00 AU/mL | 3.65   | 1 month after administering 2nd dose                        |
| Barriere et al, 2021          | Anti-S antibodies         | 42  | 245.2 UI/ml   | Range: 0 to 5467 UI/ml      | 24  | 2517 UI/ml    | Range: 157.6 to 6318.0 UI/ml      | 10.3   | Week 6-8 after 1st dose                                     |
| <b>Haematological cancers</b> |                           |     |               |                             |     |               |                                   |        |                                                             |
| Herishanu et al, 2021         | SARS-CoV-2 anti-Spike IgG | 52  | 0.824U/mL     | 0.4 to 167.3U/mL            | 52  | 1084U/mL      | 128.9 to 1879U/mL                 | 1315.5 | 2-3 weeks after 2nd dose                                    |
| Parry et al, 2021             | SARS-CoV-2 anti-Spike IgG | 9   | 53 U/mL       | -                           | 59  | 3900 U/mL     | -                                 | 73.6   | Median 18 days after 2nd dose                               |

|                                                       |                           |     |                       |                             |     |                       |                             |        |                               |
|-------------------------------------------------------|---------------------------|-----|-----------------------|-----------------------------|-----|-----------------------|-----------------------------|--------|-------------------------------|
| Tzarfati et al, 2021                                  | SARS-CoV-2 IgG            | 315 | 85 AU/mL              | 10.7 to 172 AU/mL           | 108 | 157 AU/mL             | 130 to 221 AU/mL            | 1.85   | 30-60 days after 2nd dose     |
| Pimpinelli et al, 2021 (Multiple myeloma)             | SARS-CoV-2 S1/S2 IgG      | 42  | 106.7 AU/mL*          | 95%CI: 62.3 to 179.7 AU/mL  | 36  | 353.3 AU/mL*          | 95%CI: 255.6 to 470.0 AU/mL | 3.31   | 14 days after 2nd dose        |
| Pimpinelli et al, 2021 (Myeloproliferative neoplasms) | SARS-CoV-2 S1/S2 IgG      | 50  | 172.9 AU/mL*          | 95%CI: 106.5 to 257.0 AU/mL | -   | -                     | -                           | 2.04   | 14 days after 2nd dose        |
| Lindemann et al, 2021                                 | SARS-CoV-2 anti-Spike IgG | 117 | Antibody ratio of 4.7 | -                           | 35  | Antibody ratio of 9.0 | -                           | 1.91   | Median 31 days after 2nd dose |
| Rahav et al, 2021 (Multiple myeloma)                  | RBD-IgG                   | 187 | GMT: 2.76             | 95%CI: 2.38 to 3.20         | 272 | GMT: 5.98             | 95%CI: 5.70 to 6.28         | 2.17   | 30 days after 2nd dose        |
| Rahav et al, 2021 (HSCT)                              | RBD-IgG                   | 111 | GMT: 2.55             | 95%CI: 2.03 to 3.21         | 272 | GMT: 5.98             | 95%CI: 5.70 to 6.28         | 2.35   | 30 days after 2nd dose        |
| Rahav et al, 2021 (Myelodysplastic)                   | RBD-IgG                   | 43  | GMT: 1.54             | 95%CI: 1.04 to 2.28         | 272 | GMT: 5.98             | 95%CI: 5.70 to 6.28         | 3.88   | 30 days after 2nd dose        |
| Rahav et al, 2021 (CLL/NHL)                           | RBD-IgG                   | 188 | GMT: 1.18             | 95%CI: 0.97 to 1.43         | 272 | GMT: 5.98             | 95%CI: 5.70 to 6.28         | 5.07   | 30 days after 2nd dose        |
| Marasco et al. 2021                                   | RBD-IgG                   | 263 | 175 U/mL              | 0.44 to 2600 U/mL           | 167 | 1078 U/mL             | 643 to 1841 U/mL            | 6.16   | 2 weeks after 2nd dose        |
| Peeters et al. 2021                                   | RBD-IgG                   | 41  | 17.61 IU/mL           | 95% CI: 7.17 to 43.24 IU/mL | 40  | 2955.04 IU/mL         | 2280.17 to 3829.65 IU/mL    | 167.80 | 28 days after 2nd dose        |

|                         |                                                                                                                                       |     |                      |                                   |              |                     |                                   |       |                                 |
|-------------------------|---------------------------------------------------------------------------------------------------------------------------------------|-----|----------------------|-----------------------------------|--------------|---------------------|-----------------------------------|-------|---------------------------------|
| Shem-Tov et al, 2021*   | RBD-IgG                                                                                                                               | 118 | GMT: 2.61            | 95% CI: 2.16 to 3.16              | 269          | GMT: 5.98           | 95% CI: 5.70 to 6.28              | 2.29  | 28 days (median) after 2nd dose |
| Sherman et al, 2021     | Anti-S1 IgG                                                                                                                           | 20  | 136.39 nAEB          | -                                 | 24           | 30.04 nAEB          | -                                 | 4.54  | 28 days after 2nd dose          |
| Gavriatopoulou (b)      | Neutralising antibodies                                                                                                               | 90  | 52%                  | +/-4.3%                           | 174          | 87.4%               | +/-1.3%                           | 1.68  | Day 50 from 1st dose            |
| Stampfer et al, 2021    | Anti-spike IgG                                                                                                                        | 96  | Median: 173.72 IU/mL | Standard deviation: 1653.32 IU/mL | 31           | Median: 893.6 IU/mL | Standard deviation: 1474.76 IU/mL | 5.1   | 14-21 days after 2nd dose       |
| <b>Organ transplant</b> |                                                                                                                                       |     |                      |                                   |              |                     |                                   |       |                                 |
| Rabinowich et al, 2021† | SARS-CoV-2 anti-S1/S2 IgG                                                                                                             | 38  | 95.41AU/mL           | Standard deviation: 92.4AU/mL     | 25           | 200.5AU/mL          | Standard deviation: 65.1AU/mL     | 2.10  | 10-20 days after 2nd dose       |
| Schramm et al, 2021     | T-cell response following boost SARS-CoV-2 vaccination, The Interferon (IFN)- $\gamma$ response to spike antigens SARS-CoV-2 peptides | 50  | 0.031                | 0.007 to 0.141                    | 50           | 0.512               | 0.172 to 1.281                    | 16.52 | 21 days after boost dose        |
| Mazzola et al, 2021†    | SARS-CoV-2 anti-Spike Ab                                                                                                              | 38  | 759 AU/mL            | 257 to 3269                       | Not reported | -                   | -                                 | -     | 28 days after 2nd dose          |
| Grupper et al, 2021 (a) | SARS-CoV-2 anti-Spike IgG                                                                                                             | 136 | 5.9 AU/mL            | 3.8-4.2                           | 25           | 189.0 AU/mL         | 141.0-248 AU/mL                   | 32.0  | 10-20 days after 2nd dose       |

|                              |                           |     |                                |                                    |     |              |                                  |         |                                                                          |
|------------------------------|---------------------------|-----|--------------------------------|------------------------------------|-----|--------------|----------------------------------|---------|--------------------------------------------------------------------------|
| Korth et al, 2021            | SARS-CoV-2 IgG            | 23  | 50.9 AU/mL*                    | 138.7 <sup>†</sup>                 | 23  | 727.7 AU/mL* | 151.3 <sup>†</sup>               | 14.30   | 15.8 +/- 3.0 days after 2nd dose                                         |
| Marinaki et al, 2021         | SARS-CoV-2 anti-RBD IgG   | 20  | 1370AU/mL                      | -                                  | 116 | 11710AU/mL   | -                                | 8.55    | 10 days after 2nd dose (median)                                          |
| Miele et al, 2021            | SARS-CoV-2 anti-S1/S2 IgG | 16  | 87.32 UA/mL                    | -                                  | 23  | 233 UA/mL    | -                                | 2.67    | At least 15 days after 2nd dose                                          |
| Schramm et al, 2021          | SARS-CoV-2 IgG            | 50  | (5 patients showed a response) | -                                  | 50  | 1417 BAU/mL  | 732 to 2589 BAU/mL               | -       | 21 days after 2nd dose                                                   |
| Rashidi-Alavijeh et al, 2021 | SARS-CoV-2 IgG            | 43  | 216 BAU/mL                     | -                                  | 20  | >2080 BAU/mL | -                                | >9.63   | Median 15 days (IQR, 12–24) after 2nd dose                               |
| Narasimhan et al, 2021       | SARS-CoV-2 IgG            | 73  | 1.7 AU/mL                      | 95%CI: 0.6 to 7.5 AU/mL            | 49  | 14209 AU/mL  | 95%CI: 11261 to 18836 AU/mL      | 8358.24 | Median 17.5 days (BNT162b2) or median 19 days (mRNA-1273) after 2nd dose |
| Hod et al, 2021              | SARS-CoV-2 anti-RBD IgG   | 120 | 83.7*                          | 95%CI: 50.52 to 138.8 <sup>†</sup> | 202 | 482.3*       | 95%CI: 410.9 to 566 <sup>†</sup> | 5.76    | 2-4 weeks after 2nd dose                                                 |
| Rahav et al. 2021 (Liver)    | RBD-IgG                   | 36  | GMT: 2.14                      | 95%CI: 1.46 to 3.14                | 272 | GMT: 5.98    | 95%CI: 5.70 to 6.28              | 2.79    | 30 days after 2nd dose                                                   |
| Rahav et al. 2021 (Kidney)   | RBD-IgG                   | 111 | GMT: 1.00                      | 95%CI: 0.80 to 1.24                | 272 | GMT: 5.98    | 95%CI: 5.70 to 6.28              | 5.98    | 30 days after 2nd dose                                                   |

|                                 |                           |     |             |                       |     |                                   |                       |      |                                                |
|---------------------------------|---------------------------|-----|-------------|-----------------------|-----|-----------------------------------|-----------------------|------|------------------------------------------------|
| Rahav et al. 2021 (Heart)       | RBD-IgG                   | 80  | GMT: 0.55   | 95%CI: 0.44 to 0.68   | 272 | GMT: 5.98                         | 95%CI: 5.70 to 6.28   | 10.9 | 30 days after 2nd dose                         |
| Predecki et al, 2021 (BNT162b2) | anti-S IgG                | 410 | 58 BAU/mL   | 7.1 to 722 BAU/mL     | 32  | 815 BAU/mL                        | 318 to 2033 BAU/mL    | 14.1 | 31 days after 2nd dose                         |
| Predecki et al, 2021 (AZD1222)  | anti-S IgG                | 358 | 7.1 BAU/mL  | 7.1 to 39 BAU/mL      | 8   | 88 BAU/mL                         | 47 to 395 BAU/mL      | 12.6 | 31 days after 2nd dose                         |
| Ruether et al, 2021             | Anti-S trimer             | 138 | 154 U/mL    | 1 to 1723 U/mL        | 52  | Significantly lower than patients | -                     | -    | Median 29 days after 2nd dose                  |
| Bruminhent et al (d2), 2021     | Anti-RBD IgG              | 35  | 2.4 AU/mL   | 1.1 to 3.7 AU/mL      | 38  | 1742.0 AU/mL                      | 747.0 to 3783.0 AU/mL | 726  | 2 weeks after 2nd dose                         |
| Canti et al, 2021               | Anti-RBD SARS-CoV-2 IgG   | 37  | 455 IU/mL   | 58.5 to 2007 IU/mL    | 40  | 3565 IU/mL                        | 1593 to 5609 IU/mL    | 7.84 | Day 49 after 1st dose                          |
| Crespo et al, 2021              | SARS-CoV-2 anti-Spike IgG | 90  | 139 AU/mL   | 43.4 to 440 AU/mL     | 32  | 734 AU/mL                         | 532 to 1149 AU/mL     | 5.28 | 28 (+/- 3 days) from 2nd dose                  |
| D'Offizi et al (d2), 2021       | SARS-CoV-2 anti-Spike IgG | 61  | 82.5 BAU/mL | 6.15 to 491.20 BAU/mL | 51  | 1991 BAU/mL                       | 1164 to 4451 BAU/mL   | 24.1 | 2 weeks after 2nd dose                         |
| Danthu et al, 2021              | SARS-CoV-2 anti-Spike IgG | 72  | NA          | NA                    | 7   | 1082 AU/ml                        | 293-5500 AU/mL        | NA   | 36 days after 1st dose (8 days after 2nd dose) |
| Debska-Slizien <sup>1</sup>     | Anti-S IgG                | 142 | 111 AU/mL   | 33.90 to 327 AU/mL    | 36  | 815 AU/mL                         | 698.5 to 1440 AU/mL   | 7.34 |                                                |

<sup>1</sup> Titre data reported refers to those who have seroconverted.



|                                       |                           |     |               |                          |     |               |                          |       |                                                                                   |
|---------------------------------------|---------------------------|-----|---------------|--------------------------|-----|---------------|--------------------------|-------|-----------------------------------------------------------------------------------|
| Grupper et al, 2021                   | SARS-CoV-2 anti-Spike IgG | 109 | 10.7 AU/mL    | 0 to 62.5 AU/mL          | 39  | 156 AU/mL     | 99.7 to 215.5 AU/mL      | 14.6  | At least 1 month after 2nd dose                                                   |
| Hod (b) et al, 2021                   | SARS CoV-2 anti-RBD IgG   | 120 | GMT: 0.93     | 95% CI: 0.76 to 1.15     | 202 | GMT: 6.02     | 95% CI: 5.66 to 6.42     | 6.47  | 2-4 weeks after 2nd dose                                                          |
| Kantauskaite et al, 2021              | SARS-CoV-2 anti-Spike IgG | 225 | 239 BAU/ mL   | 78 to 519 BAU/mL         | 176 | 1826 BAU/mL   | 560 to 3180 BAU/mL       | 7.64  | 14 +/- 2 days and 17 days post vaccination in KTRs and control group respectively |
| <b>IMID</b>                           |                           |     |               |                          |     |               |                          |       |                                                                                   |
| Achiron et al (a), 2021 (Cladribine)  | SARS-CoV-2 IgG            | 23  | 7.0           | 6.5 to 8.1               | 47  | 7.4           | 6.4 to 8.1               | 1.06  | 1 month after 2nd dose                                                            |
| Achiron et al (a), 2021 (Fingolimod)  | SARS-CoV-2 IgG            | 26  | 0.27          | 0.12 to 0.45             | 47  | 7.4           | 6.4 to 8.1               | 27.41 | 1 month after 2nd dose                                                            |
| Achiron et al (a), 2021 (Ocrelizumab) | SARS-CoV-2 IgG            | 44  | 0.29          | 0.06 to 0.89             | 47  | 7.4           | 6.4 to 8.1               | 25.52 | 1 month after 2nd dose                                                            |
| Geisen et al, 2021                    | SARS-CoV-2 IgG            | 26  | 2053 BAU/mL*  | 1218 BAU/mL <sup>†</sup> | 42  | 2685 BAU/mL*  | 1102BAU/mL <sup>†</sup>  | 1.31  | 7 days after dose 2                                                               |
| Haberman et al, 2021                  | SARS-CoV-2 IgG            | 25  | 46901         | Range: 25 to 694528      | 26  | 104354        | Range: 141 to 601185     | 2.23  | 1 week after 2nd dose                                                             |
| Furer et al, 2021                     | SARS-CoV-2 S1/S2 IgG      | 686 | 132.9 BAU/mL* | 91.7 BAU/mL <sup>†</sup> | 121 | 218.6 BAU/mL* | 82.06BAU/mL <sup>†</sup> | 1.65  | 2-6 weeks after 2nd dose                                                          |

|                                       |                           |     |                 |                           |              |                 |                            |        |                                          |
|---------------------------------------|---------------------------|-----|-----------------|---------------------------|--------------|-----------------|----------------------------|--------|------------------------------------------|
| Simon et al, 2021                     | SARS-CoV-2 IgG            | 84  | 6.47*           | 3.14 <sup>†</sup>         | 182          | 9.36*           | 1.85 <sup>†</sup>          | 1.45   | At least 10 days after 2nd dose          |
| Reuken et al, 2021                    | SARS-CoV-2 IgG            | 12  | 1119 BAU/mL     | -                         | 12           | 1570 BAU/mL     | -                          | 1.40   | 21 days after 1st dose                   |
| Medeiros-Ribeiro et al, 2021          | SARS-CoV-2 S1/S2 IgG      | 859 | 27.0 AU/mL      | 95%CI: 24.7 to 29.5 AU/mL | 179          | 67.0 AU/mL      | 95%CI: 59.8 to 74.9 AU/mL  | 2.48   | 6 weeks after 2nd dose                   |
| Izmirly et al, 2021                   | SARS-CoV-2 Anti-RBD IgG   | 90  | 235.2 units/mL  | 75.9 to 531.4 units/mL    | 20           | 435.7 units/mL  | 269.0 to 768.6 units/mL    | 1.85   | A median of 23 to 24 days after 2nd dose |
| Predecki et al, 2021                  | anti-S IgG                | 91  | 58.7 BAU/mL     | 0.8 to 437.2 BAU/mL       | Not reported | 877 BAU/mL      | 575 to 2203 BAU/mL         | 14.940 | 18-29 days after 2nd dose                |
| Shinjo et al, 2021                    | anti-SARS-CoV-2 S1/S2 IgG | 37  | GMT: 16.6 AU/mL | 95% CI: 9.7 to 28.3 AU/mL | 79           | GMT: 58.5 AU/mL | 95% CI: 48.4 to 70.8 AU/mL | 3.524  | 41 days after 2nd dose                   |
| Achiron et al (b), 2021 (untreated)   | SARS-CoV-2 IgG            | 76  | Median: 7.9     | 95% CI: 9.5 to 14.7       | 89           | Median: 7.1     | 95% CI: 6.2 to 7.1         | 0.90   | Within a median range of 2.3-6.3 months  |
| Achiron et al (b), 2021 (alemtezumab) | SARS-CoV-2 IgG            | 22  | Median: 7.0     | 95% CI: 5.7 to 8.3        | 89           | Median: 7.1     | 95% CI: 6.2 to 7.1         | 1.01   | Within a median range of 2.3-6.3 months  |
| Achiron et al (b), 2021 (cladribine)  | SARS-CoV-2 IgG            | 48  | Median: 6.6     | 95% CI: 5.7 to 8.3        | 89           | Median: 7.1     | 95% CI: 6.2 to 7.1         | 1.08   | Within a median range of 2.3-6.3 months  |

|                                                   |                         |     |             |                     |    |             |                    |      |                                         |
|---------------------------------------------------|-------------------------|-----|-------------|---------------------|----|-------------|--------------------|------|-----------------------------------------|
| Achiron et al (b), 2021 (dimethyl fumarate)       | SARS-CoV-2 IgG          | 35  | Median: 7.6 | 95% CI: 7.1 to 7.9  | 89 | Median: 7.1 | 95% CI: 6.2 to 7.1 | 0.93 | Within a median range of 2.3-6.3 months |
| Achiron et al (b), 2021 (fingolimod)              | SARS-CoV-2 IgG          | 42  | Median: 0.3 | 95% CI: 0.3 to 0.7  | 89 | Median: 7.1 | 95% CI: 6.2 to 7.1 | 23.7 | Within a median range of 2.3-6.3 months |
| Achiron et al (b), 2021 (natalizumab)             | SARS-CoV-2 IgG          | 32  | Median: 7.3 | 95% CI: 6.6 to 7.8  | 89 | Median: 7.1 | 95% CI: 6.2 to 7.1 | 0.97 | Within a median range of 2.3-6.3 months |
| Achiron et al (b), 2021 (ocrelizumab)             | SARS-CoV-2 IgG          | 114 | Median: 0.2 | 95% CI: 0.6 to 1.2  | 89 | Median: 7.1 | 95% CI: 6.2 to 7.1 | 35.5 | Within a median range of 2.3-6.3 months |
| Achiron et al (b), 2021 (rituximab)               | SARS-CoV-2 IgG          | 6   | Median: 0.8 | 95% CI: -0.7 to 5.2 | 89 | Median: 7.1 | 95% CI: 6.2 to 7.1 | 8.88 | Within a median range of 2.3-6.3 months |
| Achiron et al (b), 2021 (teriflunomide)           | SARS-CoV-2 IgG          | 39  | Median: 6.8 | 95% CI: 6.1 to 7.2  | 89 | Median: 7.1 | 95% CI: 6.2 to 7.1 | 1.04 | Within a median range of 2.3-6.3 months |
| Boekel et al, 2021 (rheumatoid arthritis)         | SARS-CoV-2 IgG antibody | 31  | 47 AU/mL    | 18 to 131 AU/mL     | 40 | 87          | 45 to 205 AU/mL    | 1.78 | At least 7 days after 2nd dose          |
| Boekel et al, 2021 (ankylosing spondylitis)       | SARS-CoV-2 IgG antibody | 10  | 58 AU/mL    | 20 to 189 AU/mL     | 40 | 87          | 45 to 205 AU/mL    | 1.50 | At least 7 days after 2nd dose          |
| Boekel et al, 2021 (systemic lupus erythematosus) | SARS-CoV-2 IgG antibody | 10  | 124 AU/mL   | 18 to 208 AU/mL     | 40 | 87          | 45 to 205 AU/mL    | 0.70 | At least 7 days after 2nd dose          |

|                                            |                            |     |           |                     |     |           |                        |      |                                                            |
|--------------------------------------------|----------------------------|-----|-----------|---------------------|-----|-----------|------------------------|------|------------------------------------------------------------|
| Boekel et al, 2021<br>(multiple sclerosis) | SARS-CoV-2<br>IgG antibody | 7   | 9.0 AU/mL | 0.75 to 34<br>AU/mL | 40  | 87        | 45 to 205<br>AU/mL     | 9.67 | At least 7<br>days after<br>2nd dose                       |
| Apostolidis et al,<br>2021                 | Anti-RBD                   | 20  | 28.3      | 0.01                | 10  | 585       | 453                    | 20.7 | 25-30 days<br>after 2nd<br>dose                            |
| <b>HIV</b>                                 |                            |     |           |                     |     |           |                        |      |                                                            |
| Rahav et al, 2021                          | RBD-IgG                    | 156 | GMT: 5.14 | 4.84 to 5.46        | 272 | GMT: 5.98 | 95%CI: 5.70 to<br>6.28 | 1.16 | 30 days after<br>2nd dose                                  |
| Jedicke et al                              | Anti-S IgG                 | 52  | 35 RU/mL  | 1 to 128 RU/mL      | 41  | 26 RU/mL  | 18 to 37<br>RU/mL      | 0.74 | Mean of 35<br>days (range<br>1–128 days)<br>after 2nd dose |

\*serological titres were measured and reported as means

†value is reported as standard deviation

‡data was only reported amongst seropositive individuals

**Supplementary table 5: Seroconversion rates and serological titres after a third dose of COVID-19 vaccine**

| Source                        | Outcome                                   | n, compromised                                                   | n, seroconverted | Country of study | Definition of response                    | Median                                                                                        | IQR, unless otherwise stated | n, controls                         | Endpoints of data collection     |
|-------------------------------|-------------------------------------------|------------------------------------------------------------------|------------------|------------------|-------------------------------------------|-----------------------------------------------------------------------------------------------|------------------------------|-------------------------------------|----------------------------------|
| <b>Solid cancers</b>          |                                           |                                                                  |                  |                  |                                           |                                                                                               |                              |                                     |                                  |
| Shroff et al. 2021            | Neutralising antibodies                   | 20 patients, 10 seronegative after 2nd dose                      | 5 (50.0%)        | USA              | Not explicitly stated                     | "16 participants demonstrated a median threefold increase in neutralizing antibody responses" |                              | Controls did not receive third dose | 1 week after 3rd dose            |
| <b>Haematological cancers</b> |                                           |                                                                  |                  |                  |                                           |                                                                                               |                              |                                     |                                  |
| Greenberger et al, 2021       | Anti-RBD IgG                              | 49 patients, 38 seronegative after 2nd dose                      | 21 (55.3%)       | USA              | >0.8 AU/mL                                | 32/49 (65.3%) had a rise in antibody level                                                    |                              | No controls                         | Median of 28 days after 3rd dose |
| <b>Organ Transplant</b>       |                                           |                                                                  |                  |                  |                                           |                                                                                               |                              |                                     |                                  |
| Chavarot et al, 2021          | Anti-spike IgG                            | 62, kidney transplant                                            | 4 (6.5%)         | France           | >50 AU/mL                                 | 0 AU/mL                                                                                       | 0 to 1 AU/mL                 | No controls                         | Mean of 28 days after 3rd dose   |
| Benotmane et al, 2021         | Anti-RBD                                  | 159, kidney transplant                                           | 78 (49.1%)       | France           | >50 AU/mL                                 | NIL                                                                                           | NIL                          | No controls                         | Median of 28 days after 3rd dose |
| Del Bello et al, 2021         | Various assays used in different patients | 232, solid organ transplant patients seronegative after 2nd dose | 105 (45.3%)      | France           | Various assays used in different patients | NIL                                                                                           | NIL                          | No controls                         | 4 weeks after 3rd dose           |

|                                                     |                                          |                           |                                                  |             |                                                               |                                                                                                                   |                               |                                                                                    |                           |
|-----------------------------------------------------|------------------------------------------|---------------------------|--------------------------------------------------|-------------|---------------------------------------------------------------|-------------------------------------------------------------------------------------------------------------------|-------------------------------|------------------------------------------------------------------------------------|---------------------------|
| Peled et al (b), 2021                               | Anti-RBD IgG or neutralizing antibodies  | 96, heart transplant      | 64 (66.7%)                                       | Israel      | Presence of either IgG anti-RBD or neutralizing antibodies    | Anti-RBD GMT: 1.58                                                                                                | Anti-RBD 95% CI: 1.24 to 2.00 | No controls                                                                        | 18 days after 3rd dose    |
| Westhoff et al, 2021                                | SARS-CoV-2 anti-spike IgG                | 10, renal transplant      | 6 (60.0%)                                        | France      | Elecsys Anti-SARSCoV-2-S (Roche) manufacturer recommendations | 542 U/mL                                                                                                          | 478 to 923 U/mL               | No controls                                                                        | 2 weeks after third dose  |
| Bertrand et al, 2021                                | Anti-spike IgG                           | 80, kidney transplant     | 49 (61.2%)                                       | France      | 50 AU/mL                                                      | 2238.3 AU/mL                                                                                                      | 1934.4 to 7220.6 AU/mL        | No controls                                                                        | 1 month after 3rd dose    |
| Schrezenmeier et al, 2021                           | Anti-spike S1 IgG                        | 25, kidney transplant     | 9 (36.0%)                                        | Germany     | OD ratios of $\geq 1.1$                                       | "Only three developed high titre anti-S1 IgG (OD IgG >5) whereas one was just above the threshold for positivity" |                               | No controls                                                                        | 19-27 days after 3rd dose |
| Hall et al, 2021                                    | Anti-RBD IgG and neutralising antibodies | 60, transplant recipients | Intervention: 33 (55.0%)<br>Controls: 10 (17.5%) | Canada      | Anti-RBD >100U/mL                                             | Intervention: 71% median neutralisation<br>Controls: 13% median neutralisation                                    | NIL                           | 57, transplant recipients who received 2 doses of mRNA-1273 and one saline placebo | 1 month after 3rd dose    |
| <b>IMID</b>                                         |                                          |                           |                                                  |             |                                                               |                                                                                                                   |                               |                                                                                    |                           |
| Schmiedeberg et al, 2021                            | Anti-SARS-CoV-2 S1                       | 17, rheumatoid arthritis  | 15 (88.2%)                                       | Switzerland | 133 U/mL                                                      | 2500 U/mL                                                                                                         | 798 to 2500 U/mL              | No controls                                                                        | 2 weeks after 3rd dose    |
| <b>No studies were identified for HIV patients.</b> |                                          |                           |                                                  |             |                                                               |                                                                                                                   |                               |                                                                                    |                           |

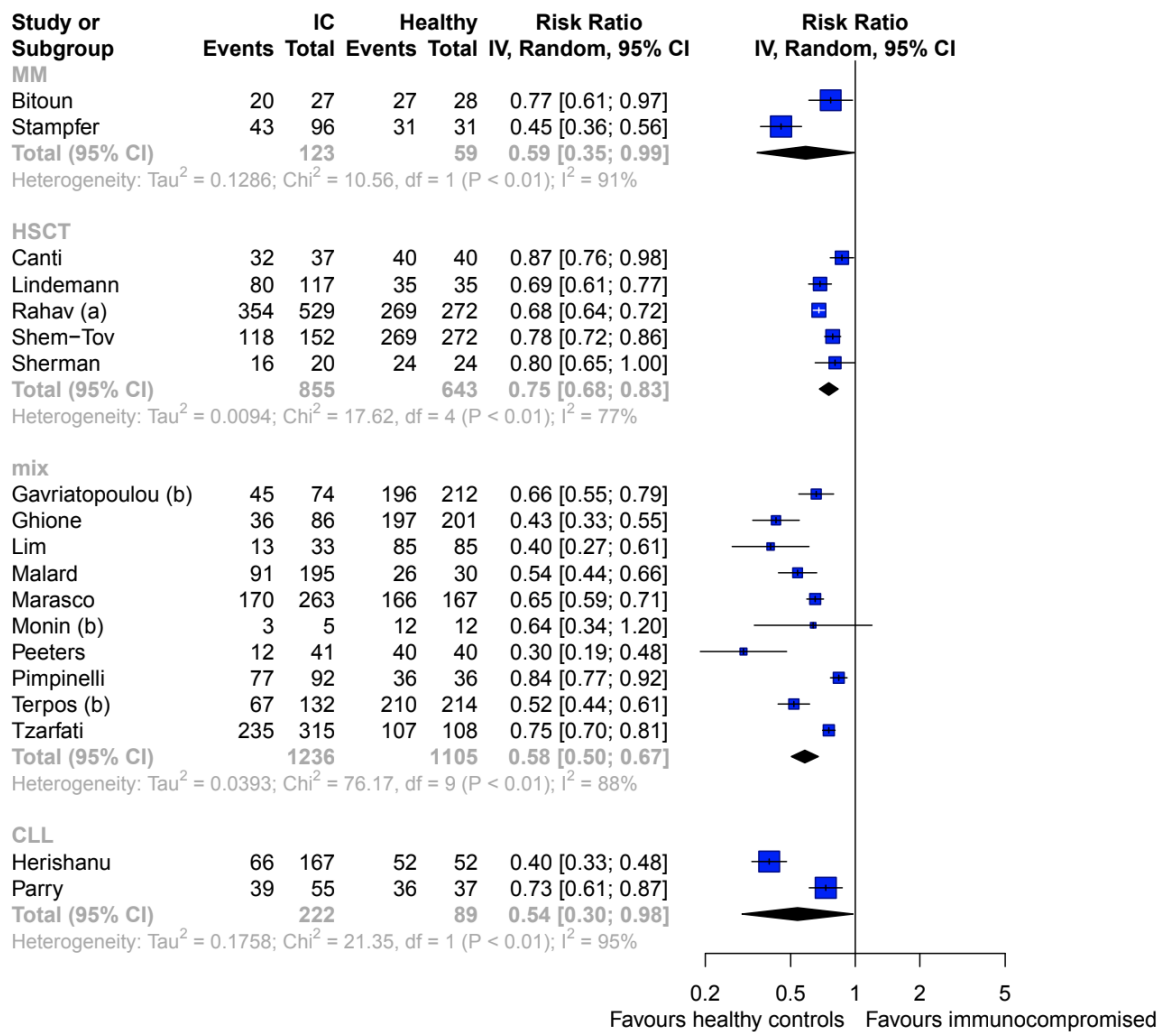

**Supplementary figure 1. Subgroup analysis of cancer type among patients with haematological cancer after second dose**

Abbreviations: MM, multiple myeloma; HSCT: haematopoietic stem cell transplant; CLL: chronic lymphocytic leukemia; CI, confidence interval; IC, immunocompromised

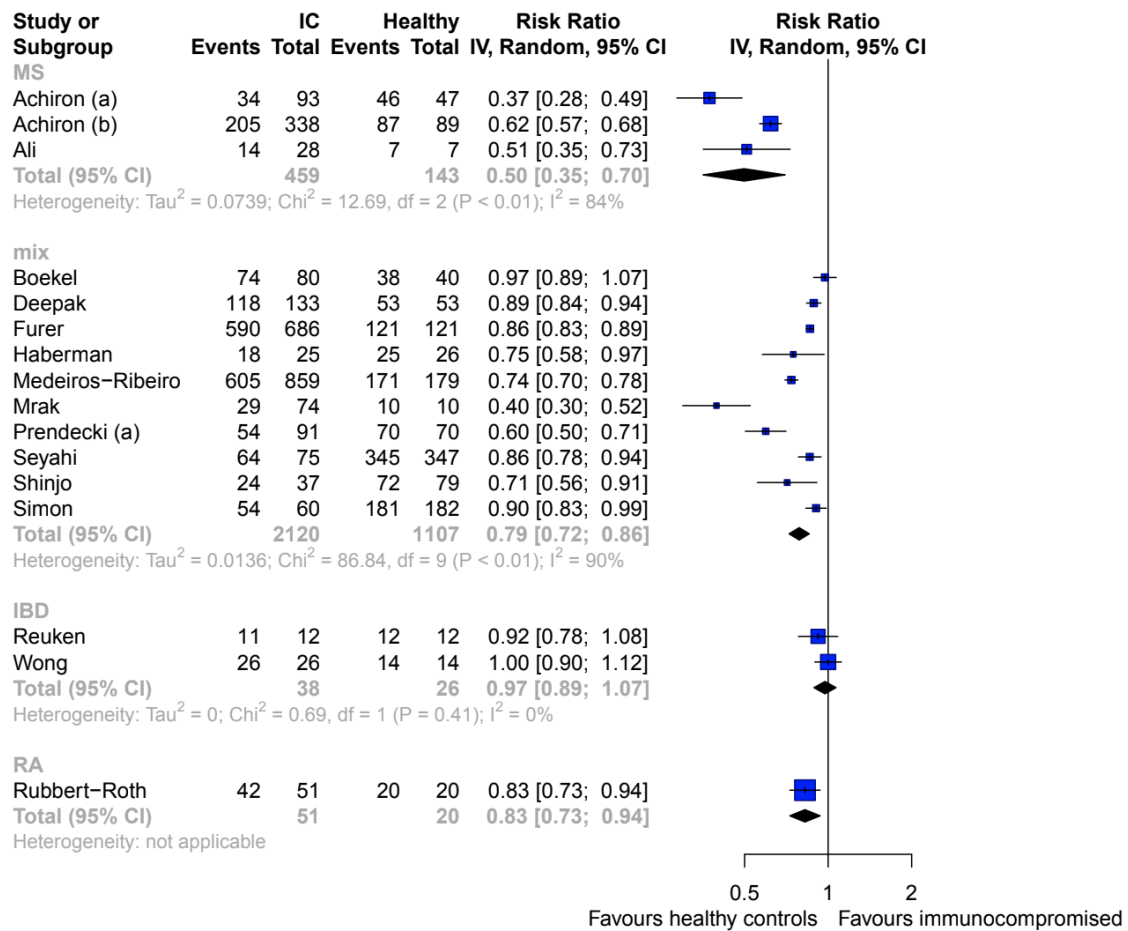

**Supplementary figure 2. Subgroup analysis of disease type among IMID patients after second dose**

Abbreviations: MS: multiple sclerosis; IBD: inflammatory bowel disease; RA: rheumatoid arthritis; CI: confidence interval; IC: immunocompromised



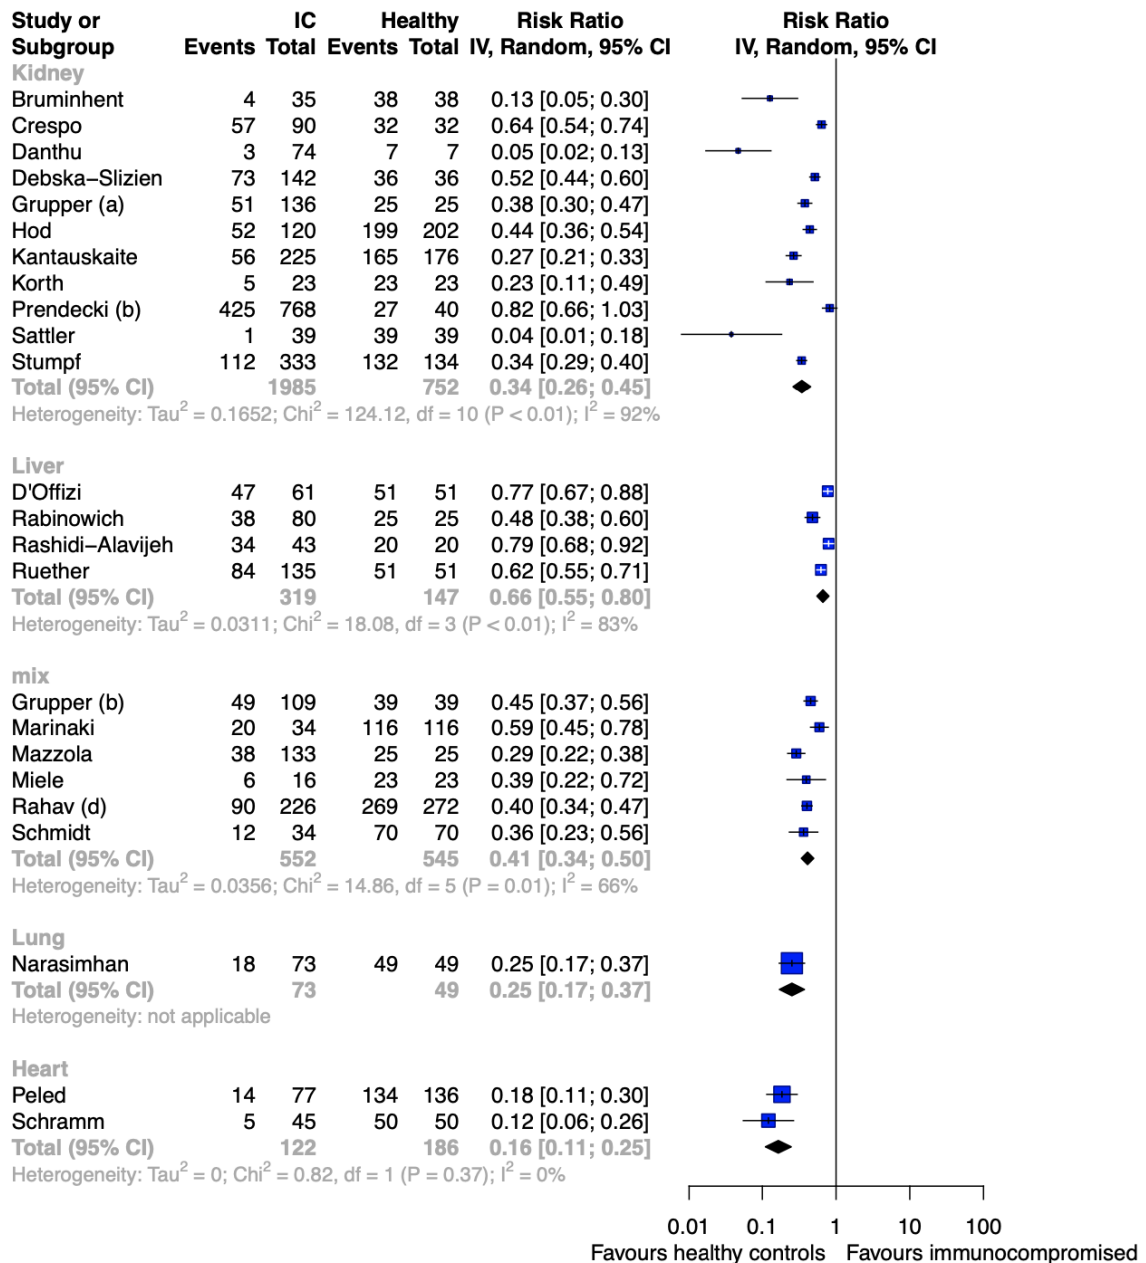

**Supplementary figure 3. Subgroup analysis of organ type among transplant recipients after second dose**

Abbreviations: CI: confidence interval; IC: immunocompromised

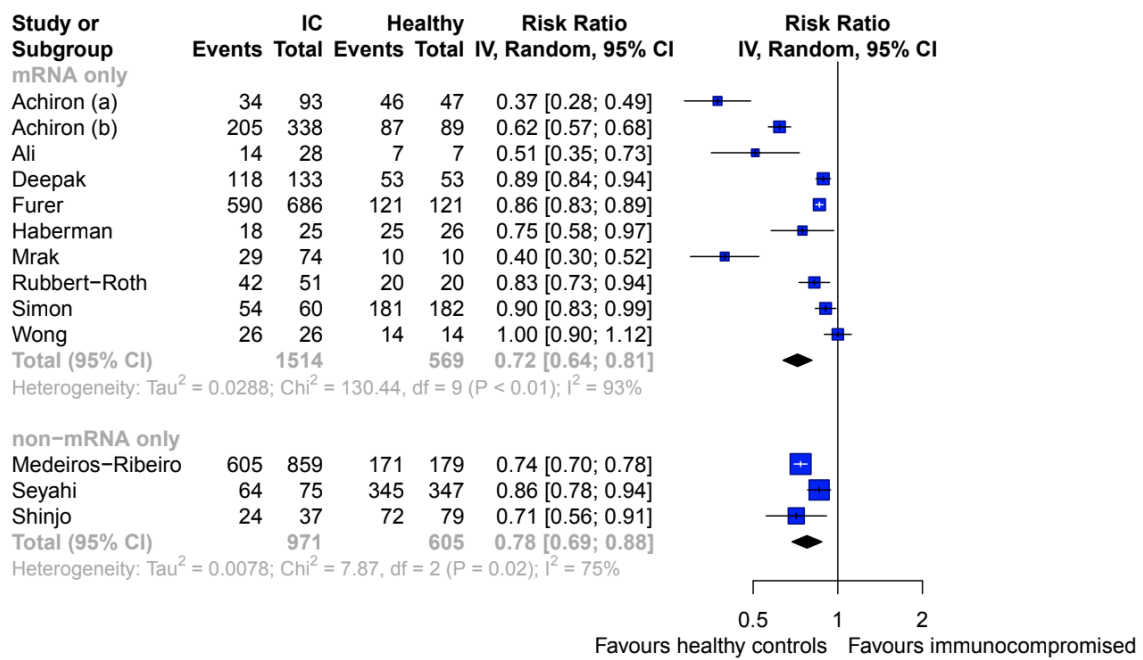

**Supplementary figure 4. Subgroup analysis of vaccine type among IMID patients after second dose**

Abbreviations: CI: confidence interval; IC: immunocompromised

**Supplementary table 6: Subgroup analysis of seroconversion RR amongst solid cancer patients after the first dose of COVID-19 vaccine**

| Variable                     | Studies | RR (95% CI)         | Test for subgroup differences (p-value) |
|------------------------------|---------|---------------------|-----------------------------------------|
| <b>Brand of serology kit</b> |         |                     |                                         |
| LIAISON                      | 2       | 0.49 (0.26 to 0.91) | 0.5750                                  |
| GenScript                    | 5       | 0.64 (0.44 to 0.91) |                                         |
| Nil / mixed                  | 2       | 0.47 (0.34 to 0.63) |                                         |
| Abbott                       | 1       | 0.55 (0.46 to 0.66) |                                         |
| Roche                        | 1       | 0.48 (0.40 to 0.58) |                                         |
| <b>Country</b>               |         |                     |                                         |
| Italy                        | 1       | 0.66 (0.59 to 0.74) | 0.0044                                  |
| Greece                       | 4       | 0.61 (0.35 to 1.07) |                                         |
| Israel                       | 2       | 0.43 (0.28 to 0.67) |                                         |
| UK                           | 1       | 0.40 (0.28 to 0.57) |                                         |
| France                       | 2       | 0.51 (0.45 to 0.59) |                                         |
| USA                          | 1       | 0.69 (0.57 to 0.84) |                                         |

Abbreviations: RR, risk ratio; CI, confidence interval

**Supplementary table 7: Subgroup analysis of seroconversion RR amongst haematological cancer patients after the first dose of COVID-19 vaccine**

| Variable                            | Studies | RR (95% CI)         | Test for subgroup differences (p-value) |
|-------------------------------------|---------|---------------------|-----------------------------------------|
| <b>Brand of serology kit</b>        |         |                     |                                         |
| WANTAI                              | 1       | 0.55 (0.41 to 0.73) | <0.0001                                 |
| Abbott                              | 1       | 0.60 (0.47 to 0.76) |                                         |
| Roche                               | 2       | 0.42 (0.28 to 0.62) |                                         |
| Nil / mixed                         | 2       | 0.25 (0.16 to 0.39) |                                         |
| Siemens                             | 1       | 0.06 (0.02 to 0.20) |                                         |
| LIAISON                             | 1       | 0.72 (0.48 to 1.08) |                                         |
| GenScript                           | 3       | 0.40 (0.24 to 0.68) |                                         |
| <b>Country</b>                      |         |                     |                                         |
| Belgium                             | 2       | 0.20 (0.02 to 1.70) | 0.2124                                  |
| UK                                  | 4       | 0.35 (0.22 to 0.55) |                                         |
| Greece                              | 3       | 0.37 (0.24 to 0.56) |                                         |
| Italy                               | 2       | 0.57 (0.41 to 0.80) |                                         |
| <b>Disease</b>                      |         |                     |                                         |
| Haematopoietic stem cell transplant | 1       | 0.55 (0.41 to 0.73) | 0.0406                                  |
| Study involved mixed conditions     | 8       | 0.41 (0.31 to 0.53) |                                         |
| Chronic lymphocytic leukemia        | 1       | 0.33 (0.26 to 0.43) |                                         |

Abbreviations: RR, risk ratio; CI, confidence interval

**Supplementary table 8: Subgroup analysis of seroconversion RR amongst solid cancer patients after the second dose of COVID-19 vaccine**

| Variable                     | Studies | RR (95% CI)         | Test for subgroup differences (p-value) |
|------------------------------|---------|---------------------|-----------------------------------------|
| <b>Brand of serology kit</b> |         |                     |                                         |
| Abbott                       | 3       | 0.88 (0.85 to 0.92) | 0.4313                                  |
| LIAISON                      | 3       | 0.91 (0.88 to 0.95) |                                         |
| GenScript                    | 3       | 0.91 (0.76 to 1.08) |                                         |
| Nil / mixed                  | 4       | 0.90 (0.84 to 0.96) |                                         |
| Roche                        | 1       | 0.95 (0.89 to 1.02) |                                         |
| <b>Country</b>               |         |                     |                                         |
| Israel                       | 6       | 0.87 (0.85 to 0.90) | 0.0009                                  |
| Italy                        | 1       | 0.93 (0.90 to 0.97) |                                         |
| Greece                       | 3       | 0.94 (0.86 to 1.03) |                                         |
| UK                           | 1       | 0.95 (0.86 to 1.05) |                                         |
| France                       | 2       | 0.94 (0.92 to 0.97) |                                         |
| USA                          | 1       | 0.79 (0.69 to 0.91) |                                         |

Abbreviations: RR, risk ratio; CI, confidence interval

**Supplementary table 9: Subgroup analysis of seroconversion RR amongst haematological cancer patients after the second dose of COVID-19 vaccine**

| Variable                     | Studies | RR (95% CI)         | Test for subgroup differences (p-value) |
|------------------------------|---------|---------------------|-----------------------------------------|
| <b>Brand of serology kit</b> |         |                     |                                         |
| Yhlo                         | 1       | 0.77 (0.61 to 0.97) | <0.0001                                 |
| WANTAI                       | 1       | 0.87 (0.76 to 0.98) |                                         |
| Roche                        | 4       | 0.62 (0.48 to 0.81) |                                         |
| Euroimmun                    | 1       | 0.69 (0.61 to 0.77) |                                         |
| Abbott                       | 1       | 0.54 (0.44 to 0.66) |                                         |
| Nil / mixed                  | 6       | 0.56 (0.46 to 0.68) |                                         |
| Siemens                      | 1       | 0.30 (0.19 to 0.48) |                                         |
| LIAISON                      | 2       | 0.79 (0.71 to 0.88) |                                         |
| GenScript                    | 2       | 0.58 (0.46 to 0.74) |                                         |
| <b>Country</b>               |         |                     |                                         |
| France                       | 2       | 0.64 (0.45 to 0.91) | 0.8016                                  |
| Belgium                      | 2       | 0.52 (0.19 to 1.47) |                                         |
| Greece                       | 2       | 0.58 (0.46 to 0.74) |                                         |
| Israel                       | 4       | 0.65 (0.55 to 0.77) |                                         |
| Germany                      | 1       | 0.69 (0.61 to 0.77) |                                         |
| Italy                        | 2       | 0.74 (0.58 to 0.95) |                                         |
| UK                           | 3       | 0.58 (0.39 to 0.88) |                                         |
| USA                          | 3       | 0.54 (0.36 to 0.81) |                                         |
| <b>Disease</b>               |         |                     |                                         |

|                                     |    |                     |        |
|-------------------------------------|----|---------------------|--------|
| Multiple myeloma                    | 2  | 0.59 (0.35 to 0.99) | 0.0111 |
| Haematopoietic stem cell transplant | 5  | 0.75 (0.68 to 0.83) |        |
| Study involved mixed conditions     | 10 | 0.58 (0.50 to 0.67) |        |
| Chronic lymphocytic leukemia        | 2  | 0.54 (0.30 to 0.98) |        |

Abbreviations: RR, risk ratio; CI, confidence interval

**Supplementary table 10: Subgroup analysis of seroconversion RR amongst IMID patients after the second dose of COVID-19 vaccine**

| Variable                     | Studies | RR (95% CI)         | Test for subgroup differences (p-value) |
|------------------------------|---------|---------------------|-----------------------------------------|
| <b>Vaccine type</b>          |         |                     |                                         |
| mRNA                         | 10      | 0.72 (0.64 to 0.81) | 0.6502                                  |
| non-mRNA                     | 3       | 0.78 (0.69 to 0.88) |                                         |
| <b>Brand of serology kit</b> |         |                     |                                         |
| Euroimmun                    | 4       | 0.64 (0.47 to 0.87) | 0.0002                                  |
| Siemens                      | 2       | 0.73 (0.38 to 1.41) |                                         |
| Nil / mixed                  | 2       | 0.92 (0.84 to 1.01) |                                         |
| LIAISON                      | 4       | 0.81 (0.72 to 0.91) |                                         |
| Roche                        | 3       | 0.68 (0.50 to 0.92) |                                         |
| Abbott                       | 1       | 0.60 (0.50 to 0.71) |                                         |
| <b>Country</b>               |         |                     |                                         |
| Israel                       | 3       | 0.60 (0.43 to 0.84) | <0.0001                                 |
| USA                          | 4       | 0.83 (0.70 to 0.98) |                                         |
| Netherlands                  | 1       | 0.97 (0.89 to 1.07) |                                         |
| Brazil                       | 2       | 0.74 (0.70 to 0.78) |                                         |
| Austria                      | 1       | 0.40 (0.30 to 0.52) |                                         |
| UK                           | 1       | 0.60 (0.50 to 0.71) |                                         |
| Germany                      | 2       | 0.91 (0.84 to 0.98) |                                         |
| Switzerland                  | 1       | 0.83 (0.73 to 0.94) |                                         |
| Turkey                       | 1       | 0.86 (0.78 to 0.94) |                                         |



| <b>Disease</b>                  |    |                     |         |
|---------------------------------|----|---------------------|---------|
| Multiple sclerosis              | 3  | 0.50 (0.35 to 0.70) | <0.0001 |
| Study involved mixed conditions | 10 | 0.79 (0.72 to 0.86) |         |
| Inflammatory bowel disease      | 2  | 0.97 (0.89 to 1.07) |         |
| Rheumatoid arthritis            | 1  | 0.83 (0.73 to 0.94) |         |

Abbreviations: RR, risk ratio; CI, confidence interval

**Supplementary table 11: Subgroup analysis of seroconversion RR amongst organ transplant patients after the second dose of COVID-19 vaccine**

| Variable                        | Studies | RR (95% CI)         | Test for subgroup differences (p-value) |
|---------------------------------|---------|---------------------|-----------------------------------------|
| <b>Brand of serology kit</b>    |         |                     |                                         |
| Abbott                          | 7       | 0.37 (0.24 to 0.57) | <0.0001                                 |
| LIAISON                         | 9       | 0.45 (0.35 to 0.57) |                                         |
| Thermo                          | 1       | 0.44 (0.36 to 0.54) |                                         |
| Euroimmun                       | 4       | 0.29 (0.22 to 0.40) |                                         |
| Nil / mixed                     | 2       | 0.28 (0.13 to 0.60) |                                         |
| Roche                           | 1       | 0.62 (0.55 to 0.71) |                                         |
| <b>Country</b>                  |         |                     |                                         |
| Thailand                        | 1       | 0.13 (0.05 to 0.30) | <0.0001                                 |
| Spain                           | 1       | 0.64 (0.54 to 0.74) |                                         |
| Italy                           | 2       | 0.59 (0.31 to 1.13) |                                         |
| France                          | 2       | 0.13 (0.02 to 0.74) |                                         |
| Poland                          | 1       | 0.52 (0.44 to 0.61) |                                         |
| Israel                          | 5       | 0.39 (0.32 to 0.47) |                                         |
| Switzerland                     | 1       | 0.44 (0.36 to 0.54) |                                         |
| Germany                         | 8       | 0.33 (0.22 to 0.48) |                                         |
| Greece                          | 1       | 0.59 (0.45 to 0.78) |                                         |
| USA                             | 1       | 0.25 (0.17 to 0.37) |                                         |
| UK                              | 1       | 0.82 (0.66 to 1.03) |                                         |
| <b>Solid organ transplanted</b> |         |                     |                                         |

|                                 |    |                     |         |
|---------------------------------|----|---------------------|---------|
| Kidney                          | 11 | 0.34 (0.26 to 0.45) | <0.0001 |
| Liver                           | 4  | 0.66 (0.55 to 0.80) |         |
| Lung                            | 1  | 0.25 (0.17 to 0.37) |         |
| Heart                           | 2  | 0.16 (0.11 to 0.25) |         |
| Study involved mixed conditions | 6  | 0.41 (0.34 to 0.50) |         |

Abbreviations: RR, risk ratio; CI, confidence interval

**Supplementary table 12: Mixed effects meta-regression of RRs against potential effect moderators (continuous and categorical study-level characteristics) for the longitudinal association of solid cancer with seroconversion RR after first dose of COVID-19 vaccine**

|                        | Ratio  | P      | 95% CI<br>Lower | 95% CI<br>Upper | I <sup>2</sup> (% residual heterogeneity) |
|------------------------|--------|--------|-----------------|-----------------|-------------------------------------------|
| Average age            | 0.9762 | 0.3003 | 0.9327          | 1.0217          | 73.82                                     |
| ROBINS-I of moderate   | 0.9204 | 0.6429 | 0.6480          | 1.3071          | 76.62                                     |
| Timepoint of 2-4 weeks | 1.0486 | 0.8600 | 0.6480          | 1.7770          | 76.45                                     |

Abbreviations: RR, risk ratio; ROBINS-I, Risk Of Bias In Non-randomized Studies of Interventions; CI, confidence interval

**Supplementary table 13: Mixed effects meta-regression of RRs against potential effect moderators (continuous and categorical study-level characteristics) for the longitudinal association of haematological cancer with seroconversion RR after first dose of COVID-19 vaccine**

|                        | Ratio  | P      | 95% CI<br>Lower | 95% CI<br>Upper | I <sup>2</sup> (% residual<br>heterogeneity) |
|------------------------|--------|--------|-----------------|-----------------|----------------------------------------------|
| Average age            | 0.9815 | 0.5283 | 0.9262          | 1.0401          | 81.11                                        |
| ROBINS-I of moderate   | 1.0624 | 0.8472 | 0.5744          | 1.965           | 81.58                                        |
| Timepoint of 2-4 weeks | 1.2331 | 0.6480 | 0.5016          | 3.0310          | 82.26                                        |
| Timepoint of >=4 weeks | 1.5433 | 0.3619 | 0.6073          | 3.9220          |                                              |

Abbreviations: RR, risk ratio; ROBINS-I, Risk Of Bias In Non-randomized Studies of Interventions; CI, confidence interval

**Supplementary table 14: Mixed effects meta-regression of RRs against potential effect moderators (continuous and categorical study-level characteristics) for the longitudinal association of solid cancer with seroconversion RR after second dose of COVID-19 vaccine**

|                        |        | <b>P</b> | <b>95% CI<br/>Lower</b> | <b>95% CI<br/>Upper</b> | <b>I<sup>2</sup> (% residual<br/>heterogeneity)</b> |
|------------------------|--------|----------|-------------------------|-------------------------|-----------------------------------------------------|
| Average age            | 1.011  | 0.0265   | 1.0012                  | 1.0200                  | 50.76                                               |
| ROBINS-I of moderate   | 1.0191 | 0.5411   | 0.9592                  | 1.0827                  | 54.41                                               |
| Timepoint of 2-4 weeks | 1.0378 | 0.4898   | 0.9342                  | 1.1529                  | 53.67                                               |
| Timepoint of >=4 weeks | 1.0109 | 0.8398   | 1.5008                  | 1.1227                  |                                                     |

Abbreviations: RR, risk ratio; ROBINS-I, Risk Of Bias In Non-randomized Studies of Interventions; CI, confidence interval

**Supplementary table 15: Mixed effects meta-regression of RRs against potential effect moderators (continuous and categorical study-level characteristics) for the longitudinal association of haematological cancer with seroconversion RR after second dose of COVID-19 vaccine**

|                        | Ratio  | P      | 95% CI<br>Lower | 95% CI<br>Upper | I <sup>2</sup> (% residual heterogeneity) |
|------------------------|--------|--------|-----------------|-----------------|-------------------------------------------|
| Average age            | 0.9870 | 0.2637 | 0.9644          | 1.0099          | 89.01                                     |
| ROBINS-I of moderate   | 1.0984 | 0.5037 | 0.8342          | 1.4463          | 87.92                                     |
| Timepoint of 2-4 weeks | 0.9894 | 0.9773 | 0.4749          | 2.0612          | 88.52                                     |
| Timepoint of ≥4 weeks  | 1.0417 | 0.9140 | 2.0174          | 2.1893          |                                           |

Abbreviations: RR, risk ratio; ROBINS-I, Risk Of Bias In Non-randomized Studies of Interventions; CI, confidence interval

**Supplementary table 16: Mixed effects meta-regression of RRs against potential effect moderators (continuous and categorical study-level characteristics) for the longitudinal association of IMIDs with seroconversion RR after second dose of COVID-19 vaccine**

|                        | Ratio  | P      | 95% CI Lower | 95% CI Upper | I <sup>2</sup> (% residual heterogeneity) |
|------------------------|--------|--------|--------------|--------------|-------------------------------------------|
| Average age            | 0.9946 | 0.4587 | 0.9804       | 1.0089       | 90.37                                     |
| ROBINS-I of moderate   | 1.3239 | 0.0030 | 1.0998       | 1.5938       | 90.93                                     |
| Timepoint of 2-4 weeks | 0.8714 | 0.3770 | 0.6422       | 1.1825       | 87.98                                     |
| Timepoint of ≥4 weeks  | 0.6942 | 0.0221 | 0.5079       | 0.9489       |                                           |

Abbreviations: RR, risk ratio; ROBINS-I, Risk Of Bias In Non-randomized Studies of Interventions; CI, confidence interval



**Supplementary table 17: Mixed effects meta-regression of RRs against potential effect moderators (continuous and categorical study-level characteristics) for the longitudinal association of transplant with seroconversion RR after second dose of COVID-19 vaccine**

|                        | Ratio  | P      | 95% CI<br>Lower | 95% CI<br>Upper | I <sup>2</sup> (% residual heterogeneity) |
|------------------------|--------|--------|-----------------|-----------------|-------------------------------------------|
| Average age            | 0.9725 | 0.2542 | 0.9271          | 1.0202          | 91.68                                     |
| ROBINS-I of moderate   | 1.6977 | 0.0080 | 1.1479          | 2.5108          | 91.93                                     |
| Timepoint of 2-4 weeks | 1.7069 | 0.1423 | 0.8356          | 3.4872          | 92.92                                     |
| Timepoint of >=4 weeks | 2.5849 | 0.0157 | 1.1960          | 5.5868          |                                           |

Abbreviations: RR, risk ratio; ROBINS-I, Risk Of Bias In Non-randomized Studies of Interventions; CI, confidence interval

**Supplementary table 18: Meta-analyses of seroconversion risk and seroconversion RR compared to immunocompetent individuals after the first dose of COVID-19 vaccine in subgroups, stratified by categorical study-level characteristics**

|                       | Seroconversion risk |                  |                | Seroconversion RR |                  |                |
|-----------------------|---------------------|------------------|----------------|-------------------|------------------|----------------|
|                       | Studies             | Risk (95% CI)    | I <sup>2</sup> | Studies           | RR (95% CI)      | I <sup>2</sup> |
| <b>Population</b>     |                     |                  |                |                   |                  |                |
| Solid cancer          | 11                  | 0.44 (0.36-0.53) | 84%            | 11                | 0.55 (0.46-0.65) | 78%            |
| Haematological cancer | 11                  | 0.29 (0.20-0.40) | 89%            | 11                | 0.40 (0.32-0.50) | 80%            |
| Organ transplant      | 6                   | 0.06 (0.04-0.08) | 0%             | 6                 | 0.06 (0.04-0.09) | 0%             |
| IMiD                  | 7                   | 0.29 (0.11-0.58) | 97%            | 7                 | 0.53 (0.39-0.71) | 89%            |
| HIV/AIDS              | 1                   | 0.69 (0.53-0.82) | NA             | 1                 | 1.06 (0.74-1.54) | NA             |
| Healthy               | 35                  | 0.91 (0.83-0.95) | 91%            | Reference         |                  |                |

Abbreviations: RR, risk ratio; CI, confidence interval

**Supplementary table 19: Meta-analyses of seroconversion risk and seroconversion RR compared to immunocompetent individuals after the second dose of COVID-19 vaccine in subgroups, stratified by categorical study-level characteristics**

|                       | Seroconversion risk |                  |                | Seroconversion RR |                  |                |
|-----------------------|---------------------|------------------|----------------|-------------------|------------------|----------------|
|                       | Studies             | Risk (95% CI)    | I <sup>2</sup> | Studies           | RR (95% CI)      | I <sup>2</sup> |
| <b>Population</b>     |                     |                  |                |                   |                  |                |
| Solid cancer          | 14                  | 0.89 (0.86-0.91) | 49%            | 14                | 0.90 (0.88-0.93) | 51%            |
| Haematological cancer | 19                  | 0.62 (0.54-0.70) | 90%            | 19                | 0.63 (0.57-0.69) | 88%            |
| Organ transplant      | 24                  | 0.35 (0.26-0.46) | 92%            | 24                | 0.39 (0.32-0.46) | 92%            |
| IMiD                  | 16                  | 0.77 (0.66-0.85) | 93%            | 16                | 0.75 (0.69-0.82) | 92%            |
| HIV                   | 4                   | 0.97 (0.83-1.00) | 89%            | 4                 | 1.00 (0.98-1.01) | 0%             |
| Healthy               | 73                  | 0.99 (0.99-1.00) | 61%            | Reference         |                  |                |

Abbreviations: RR, risk ratio; CI, confidence interval.



|                    |   |   |   |   |   |   |   |   |
|--------------------|---|---|---|---|---|---|---|---|
| an                 |   |   |   |   |   |   |   |   |
| Parry              | L | L | L | L | L | L | L | L |
| Rashidi-Alavijeh   | M | L | L | L | L | L | L | M |
| Reuken             | L | L | L | L | L | L | L | L |
| Schramm            | L | L | L | L | L | L | L | L |
| Stumpf             | M | L | L | L | L | L | L | M |
| Canti              | L | L | L | L | L | L | L | L |
| Bitoun             | L | L | L | L | L | L | L | L |
| Lindeman<br>n      | L | L | L | L | L | L | L | L |
| Gavriatopoulou (b) | L | L | L | L | L | L | L | L |
| Terpos (b)         | L | L | L | L | L | L | L | L |
| Rahav              | L | L | L | L | L | L | L | L |
| Shem-Tov           | L | L | L | L | L | L | L | L |
| Marasco            | L | L | L | L | L | L | L | L |
| Lim                | L | L | L | L | L | L | L | L |
| Sherman            | L | L | L | L | L | L | L | L |
| Ghione             | L | L | L | L | L | L | L | L |
| Stampfer           | L | L | L | L | L | L | L | L |
| Itzchak            | L | L | L | L | L | L | L | M |
| Shabir             | L | L | L | L | L | L | L | L |
| Woldem<br>skel     | L | L | L | L | L | L | L | L |
| Mrak               | L | L | L | L | L | L | L | L |
| Shinjo             | L | L | L | L | L | L | L | L |
| Achiron<br>(b)     | L | L | L | L | L | L | L | L |
| Boekel             | L | L | L | L | M | L | L | M |
| Predecki<br>(a)    | L | L | L | L | L | L | L | L |
| Ali                | L | L | L | L | L | L | L | L |
| Wong               | L | M | L | L | M | L | L | M |
| Barriere           | L | L | L | L | L | L | L | M |
| Linardou           | M | L | L | L | L | L | L | M |
| Liontos<br>(a)     | L | L | L | L | L | L | L | L |
| Liontos<br>(b)     | L | L | L | L | L | L | L | L |
| Zagouri            | L | L | L | L | M | L | L | M |
| Agbarya            | L | L | L | L | L | L | L | L |
| Grinshpun          | L | L | L | L | L | L | L | L |
| Shmueli            | M | L | L | L | L | L | L | M |
| Di Noia            | L | L | L | L | L | L | L | L |
| Kantausk<br>aite   | L | L | L | L | L | L | L | L |
| Ruether            | L | L | L | L | L | L | L | L |
| Schmidt            | L | L | L | L | L | L | L | L |
| Grupper<br>(b)     | L | L | L | L | L | L | L | L |
| D'Offizi           | L | L | L | L | L | L | L | L |
| Debska-<br>Slizien | L | L | L | L | M | L | L | M |
| Crespo             | M | L | L | L | L | L | L | M |
| Bruminhe<br>nt     | L | L | L | L | L | L | L | L |

|              |   |   |   |   |   |   |   |   |
|--------------|---|---|---|---|---|---|---|---|
| Predecki (b) | L | L | L | L | L | L | L | M |
| Shroff       | L | L | L | L | L | L | L | L |
| Peeters      | L | L | L | L | L | L | L | L |

L: Low risk of bias; M: Moderate risk of bias

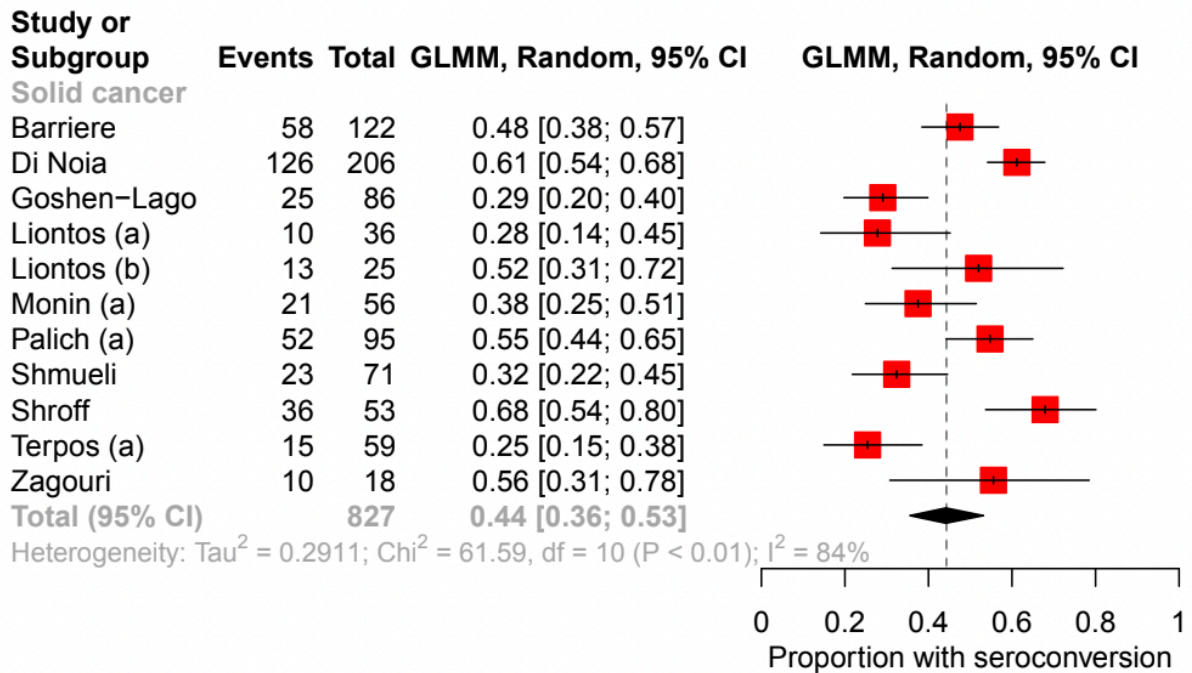

**Supplementary figure 5: Absolute risk of seroconversion among patients with solid cancer after first dose**

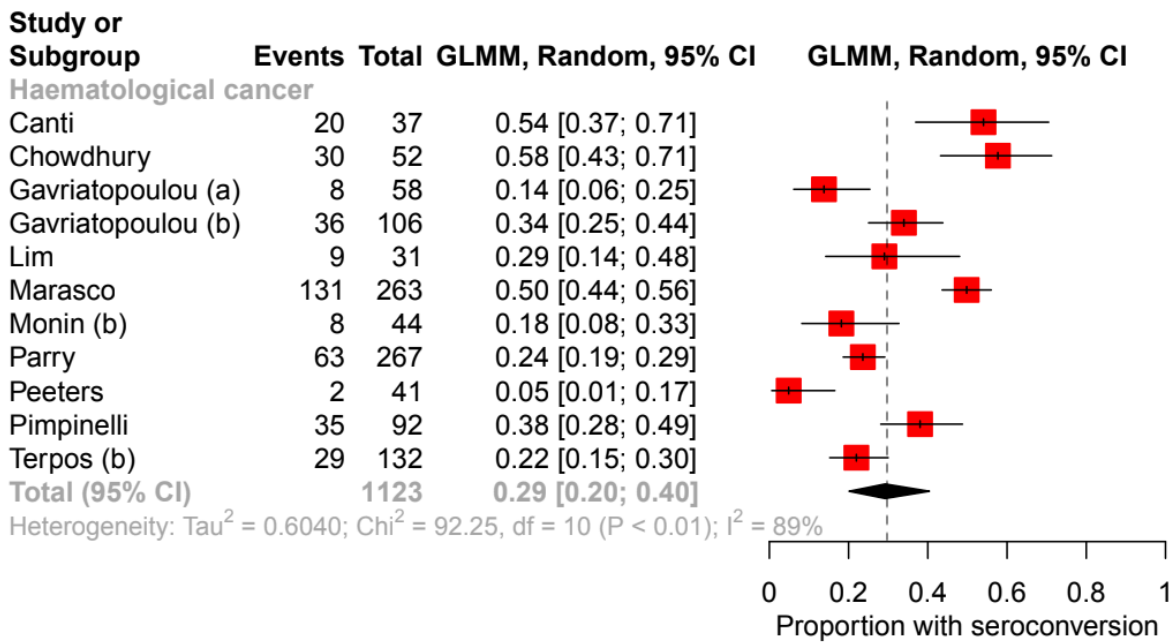

**Supplementary figure 6: Absolute risk of seroconversion among patients with haematological cancer after first dose**

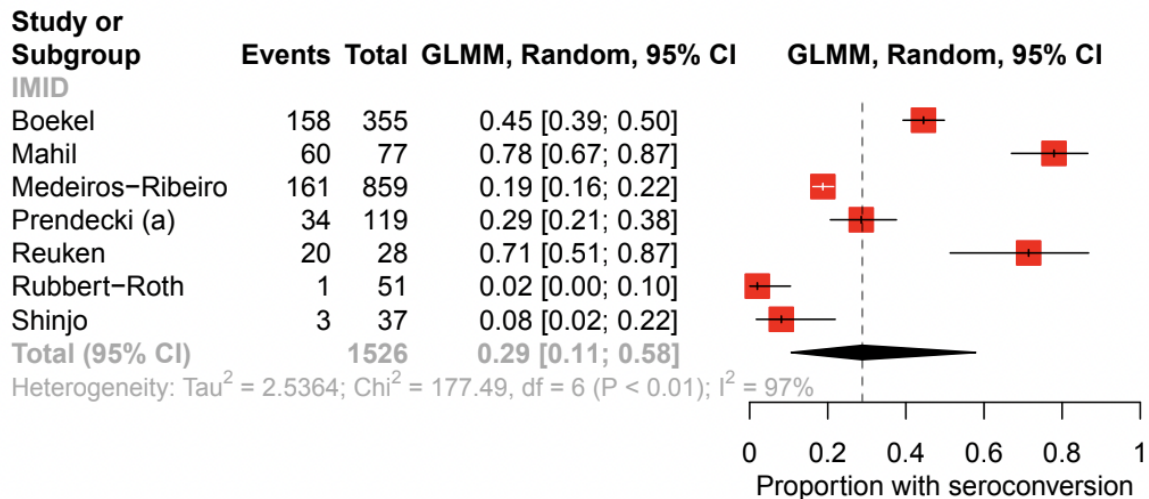

**Supplementary figure 7: Absolute risk of seroconversion among IMID patients after first dose**

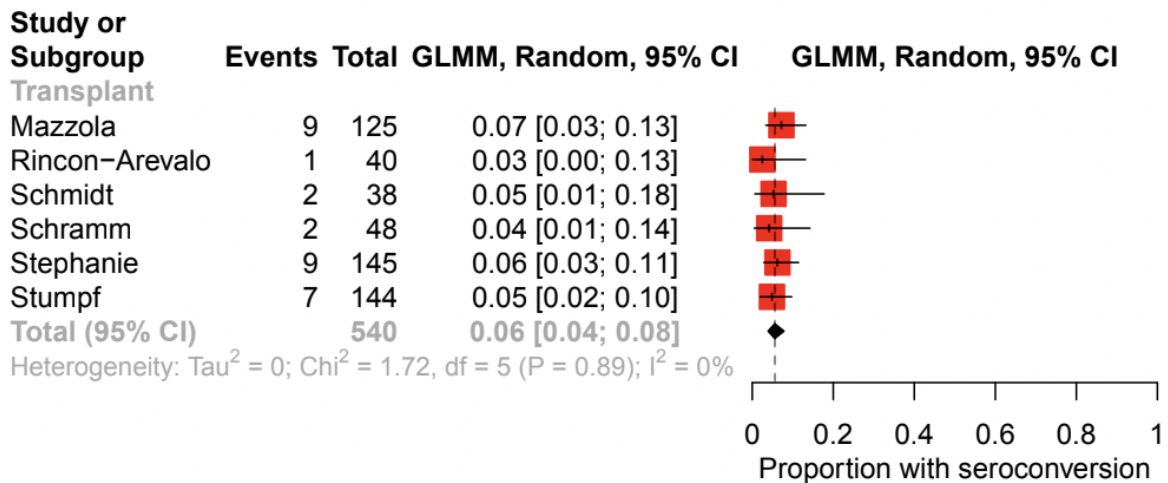

**Supplementary figure 8: Absolute risk of seroconversion among transplant recipients after first dose**



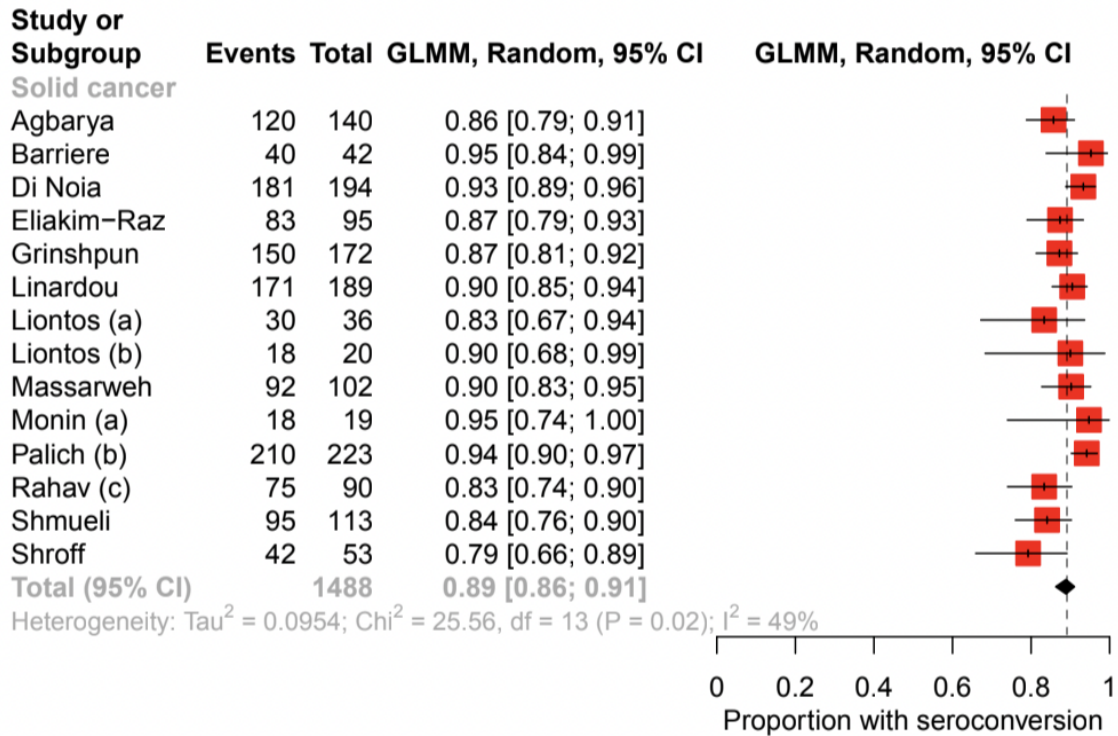

**Supplementary figure 9: Absolute risk of seroconversion among patients with solid cancer after second dose**

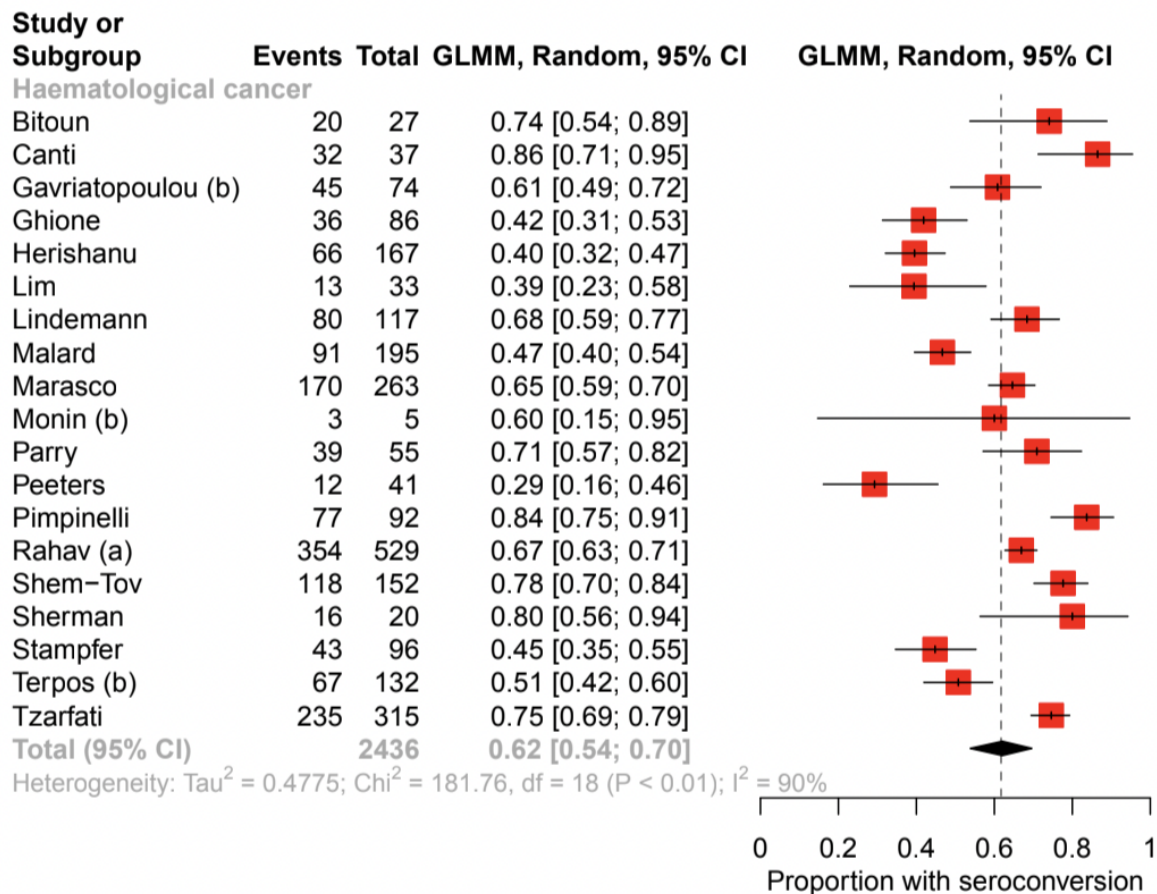

**Supplementary figure 10: Absolute risk of seroconversion among patients with haematological after second dose**

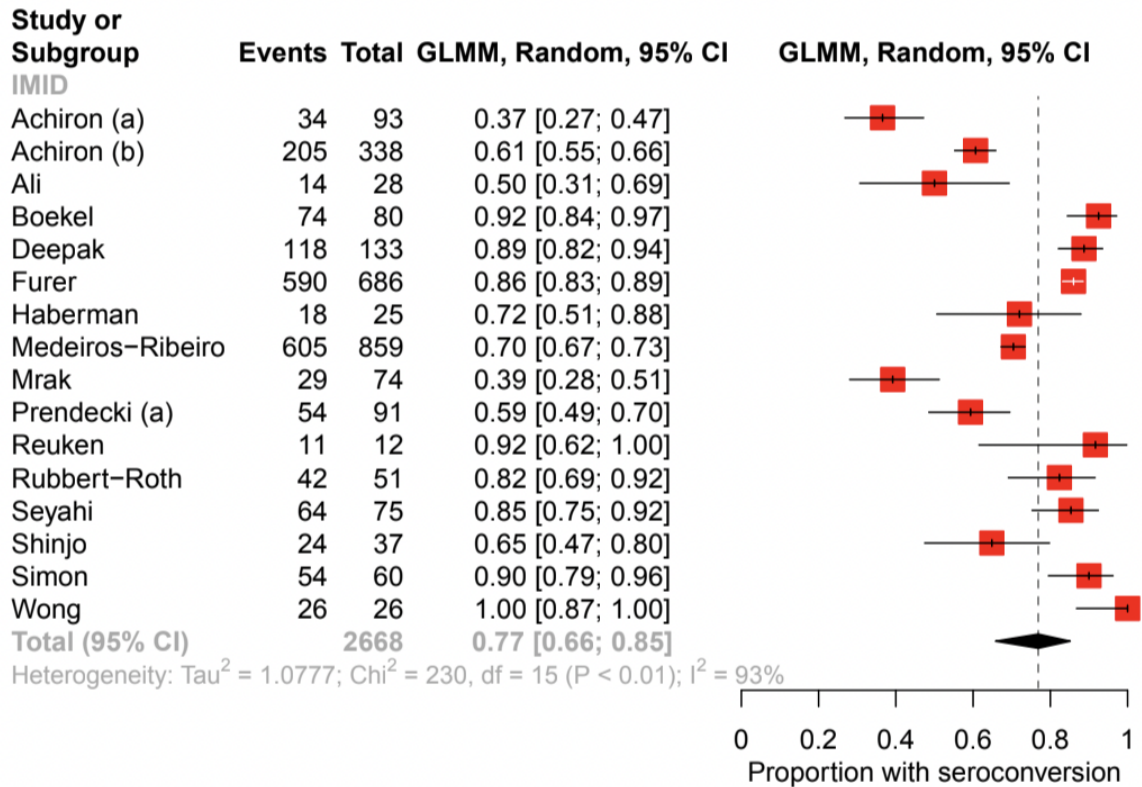

**Supplementary figure 11: Absolute risk of seroconversion among IMID patients after second dose**

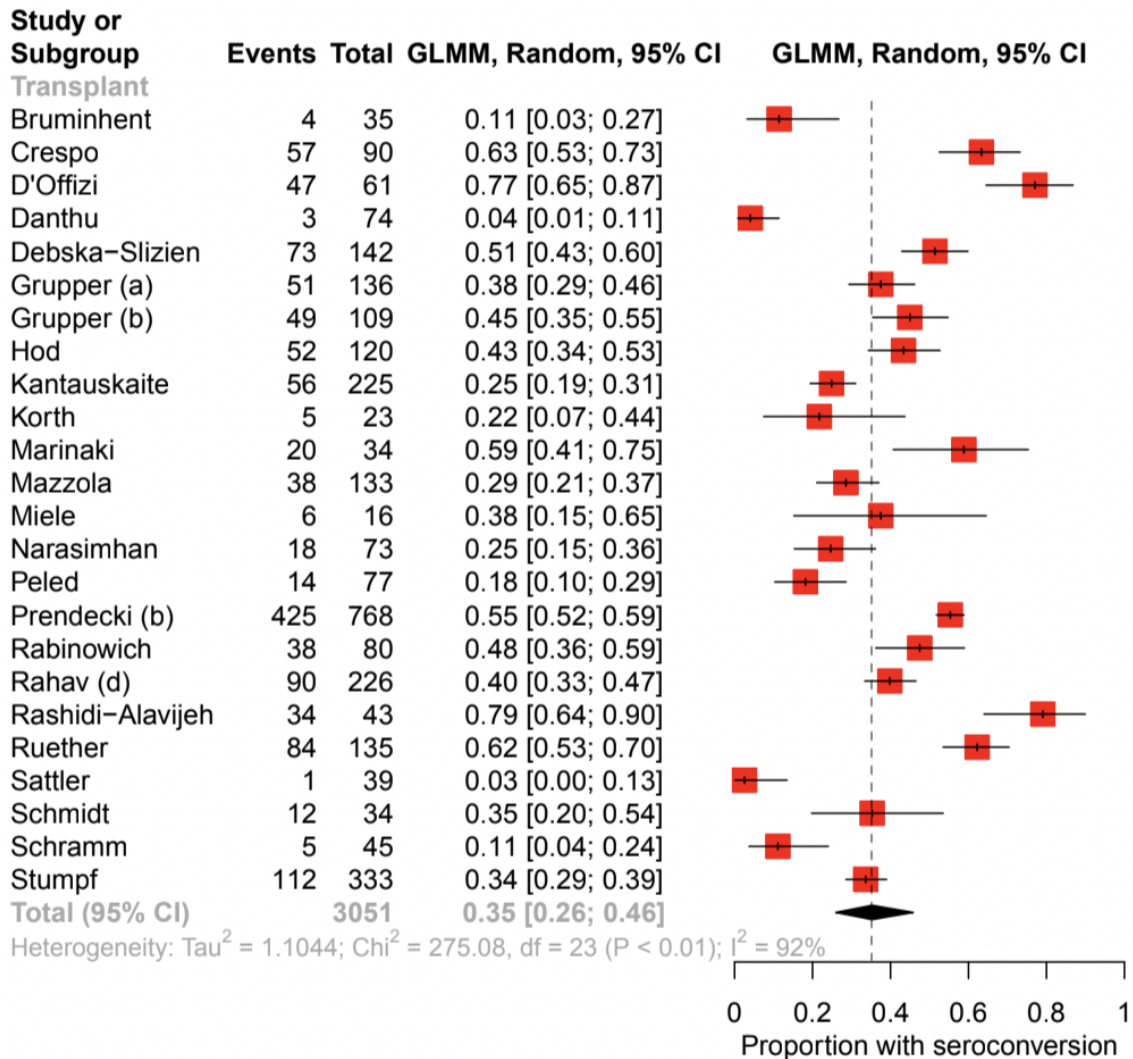

**Supplementary figure 12: Absolute risk of seroconversion among transplant recipients after second dose**

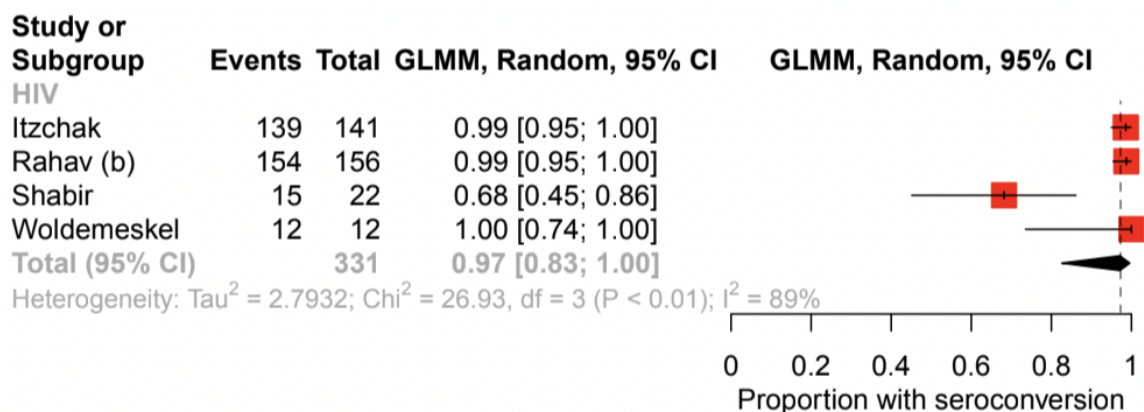

**Supplementary figure 13: Absolute risk of seroconversion among HIV patients after second dose**

**Supplementary figure 14: Funnel plot with trim-and-fill imputation of potentially missing studies after first dose in solid cancer patients**

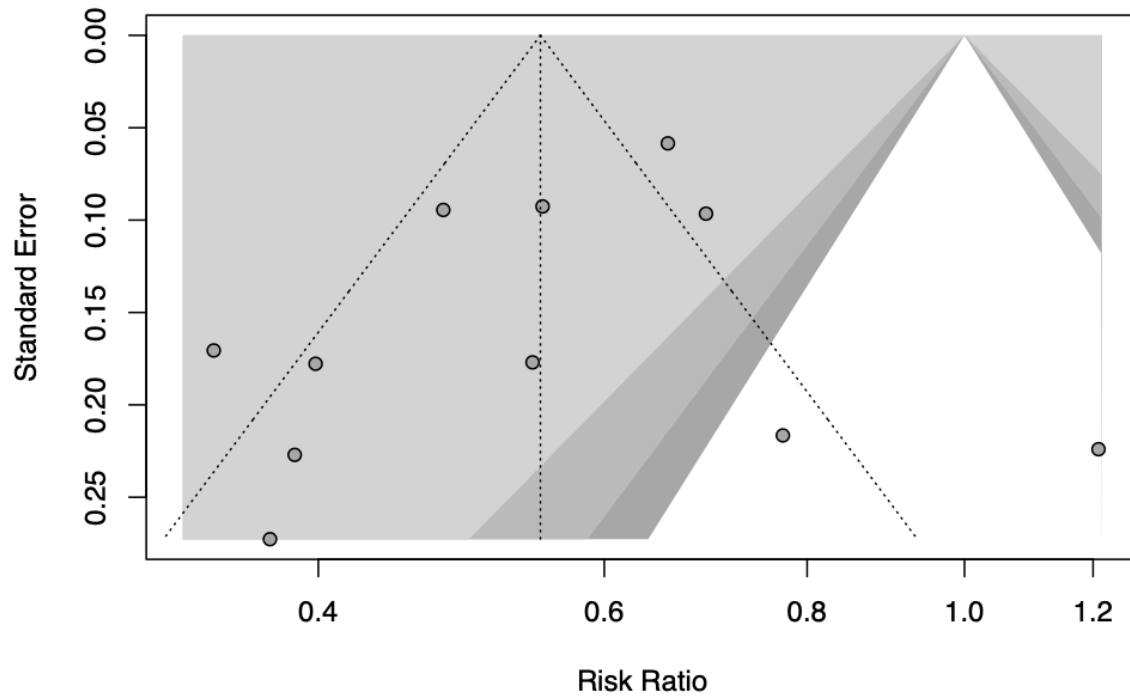

**Linear regression test of funnel plot asymmetry**

Test result:  $t = -1.00$ ,  $df = 9$ ,  $p\text{-value} = 0.3420$

Number of studies combined:  $k = 11$  (with 0 added studies)

Using random effects model:

Risk ratio: 0.5481

95%-CI: 0.4636; 0.6479

Quantifying heterogeneity:

$\tau^2 = 0.0541$  [0.0270; 0.3125];  $\tau = 0.2326$  [0.1644; 0.5590]

$I^2 = 77.6\%$  [60.2%; 87.4%];  $H = 2.11$  [1.58; 2.82]

Test of heterogeneity:

Q: 44.67

d.f.: 10

P-value < 0.0001

**Supplementary figure 15: Funnel plot with trim-and-fill imputation of potentially missing studies after first dose in haematological cancer patients**

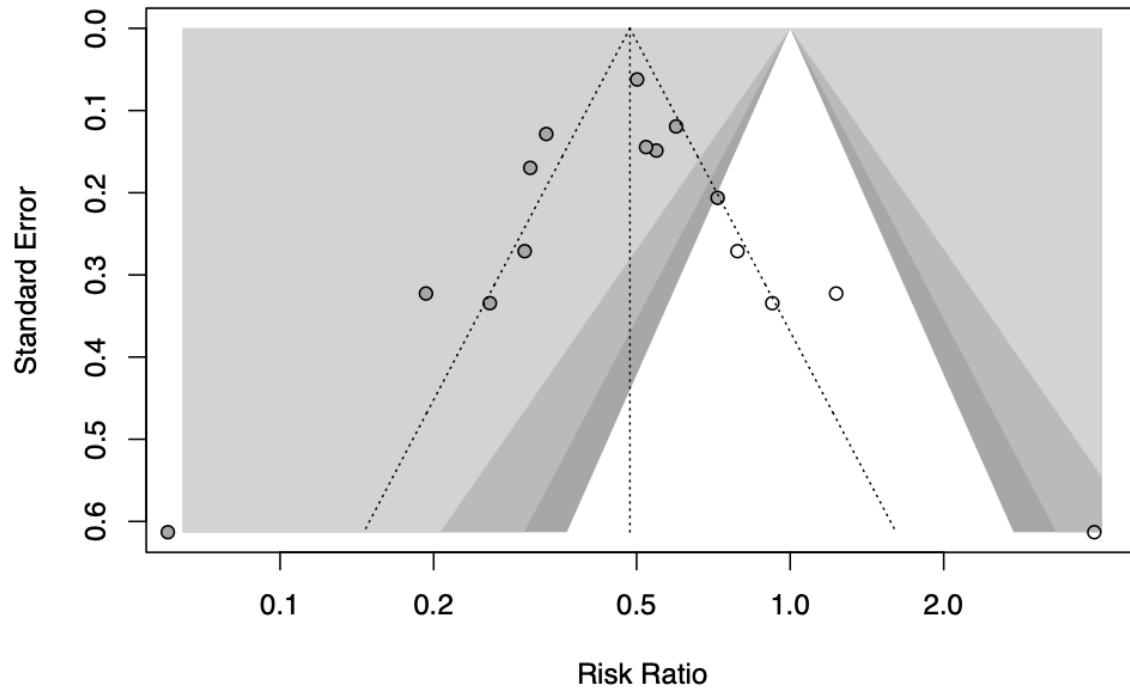

**Linear regression test of funnel plot asymmetry**

Test result:  $t = -2.23$ ,  $df = 9$ ,  $p\text{-value} = 0.0525$

Number of studies combined:  $k = 15$  (with 4 added studies)

Using random effects model:

Risk ratio: 0.4851

95%-CI: 0.3875; 0.6072

Quantifying heterogeneity:

$\tau^2 = 0.1322$  [0.1426; 0.9787];  $\tau = 0.3636$  [0.3776; 0.9893]

$I^2 = 81.8\%$  [71.0%; 88.5%];  $H = 2.34$  [1.86; 2.95]

Test of heterogeneity:

Q: 76.83

d.f.: 14

P-value < 0.0001

**Supplementary figure 16: Funnel plot with trim-and-fill imputation of potentially missing studies after first dose in IMID patients**

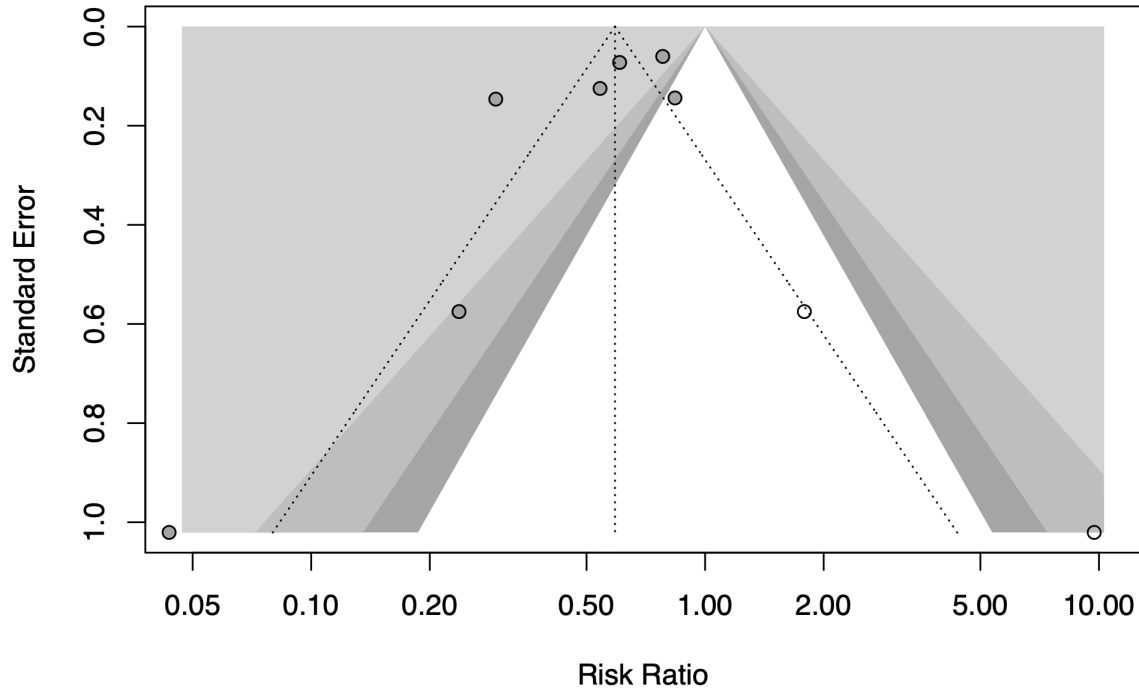

**Linear regression test of funnel plot asymmetry**

Test result:  $t = -1.85$ ,  $df = 5$ ,  $p\text{-value} = 0.1236$

Number of studies combined:  $k = 9$  (with 2 added studies)

Using random effects model:

Risk ratio: 0.4847

95%-CI: 0.3836; 0.6126

Quantifying heterogeneity:

$\tau^2 = 0.1288$  [0.1423; 2.3222];  $\tau = 0.3589$  [0.3773; 1.5239]

$I^2 = 87.7\%$  [78.8%; 92.9%];  $H = 2.85$  [2.17; 3.74]

Test of heterogeneity:

Q: 64.98

d.f.: 8

P-value < 0.0001

**Supplementary figure 17: Funnel plot with trim-and-fill imputation of potentially missing studies after first dose in transplant patients**

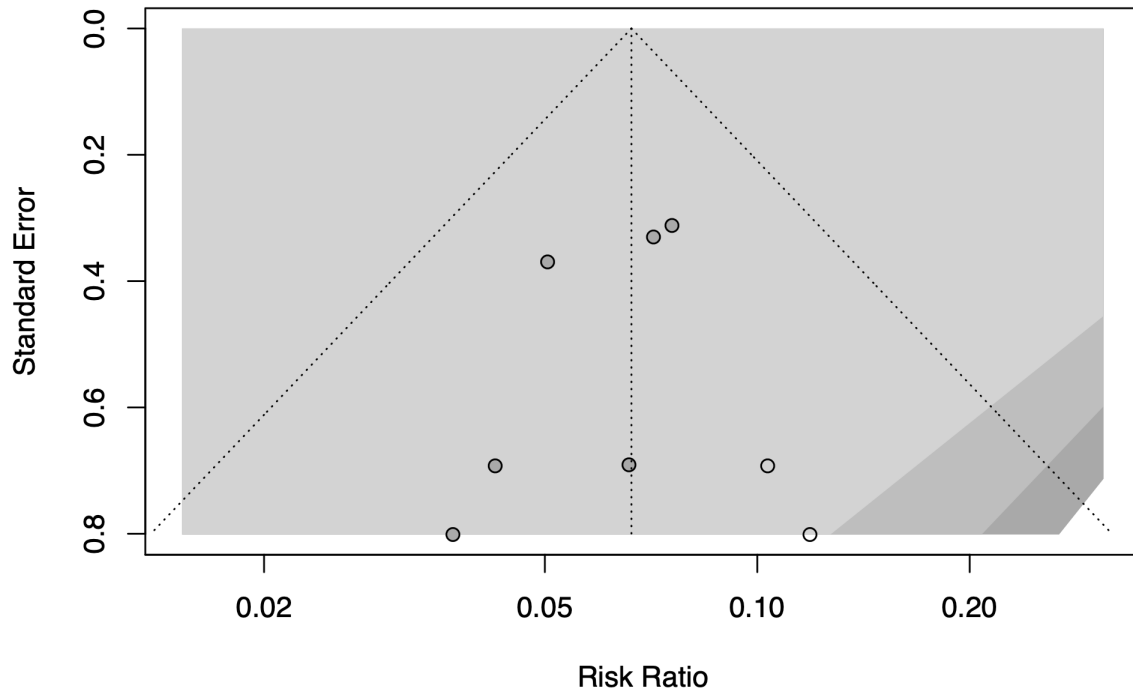

**Linear regression test of funnel plot asymmetry**

Test result:  $t = -1.85$ ,  $df = 4$ ,  $p\text{-value} = 0.1378$

Number of studies combined:  $k = 8$  (with 2 added studies)

Using random effects model:

Risk ratio: 0.0663

95%-CI: 0.0479; 0.0919

Quantifying heterogeneity:

$\tau^2 = 0$  [0.0000; 0.2098];  $\tau = 0$  [0.0000; 0.4580]

$I^2 = 0.0\%$  [0.0%; 67.6%];  $H = 1.00$  [1.00; 1.76]

Test of heterogeneity:

Q: 2.66

d.f.: 7

P-value < 0.9148

**Supplementary figure 18: Funnel plot with trim-and-fill imputation of potentially missing studies after second dose in solid cancer patients**

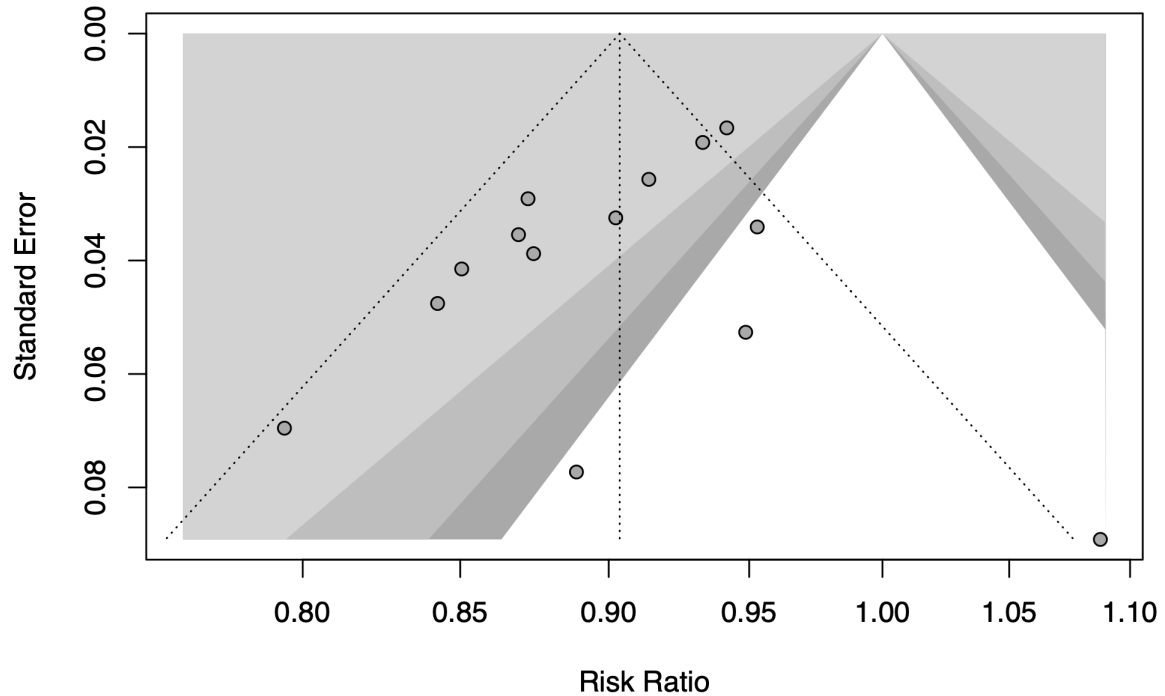

**Linear regression test of funnel plot asymmetry**

Test result:  $t = -1.49$ ,  $df = 12$ ,  $p\text{-value} = 0.1608$

Number of studies combined:  $k = 14$  (with 0 added studies)

Using random effects model:

Risk ratio: 0.9038

95%-CI: 0.8804; 0.9279

Quantifying heterogeneity:

$\tau^2 = 0.0011$  [0.0001; 0.0073];  $\tau = 0.0330$  [0.0078; 0.0855]

$I^2 = 50.7\%$  [9.0%; 73.3%];  $H = 1.42$  [1.05; 1.93]

Test of heterogeneity:

Q: 26.36

d.f.: 13

P-value < 0.0152



**Supplementary figure 19: Funnel plot with trim-and-fill imputation of potentially missing studies after second dose in haematological cancer patients**

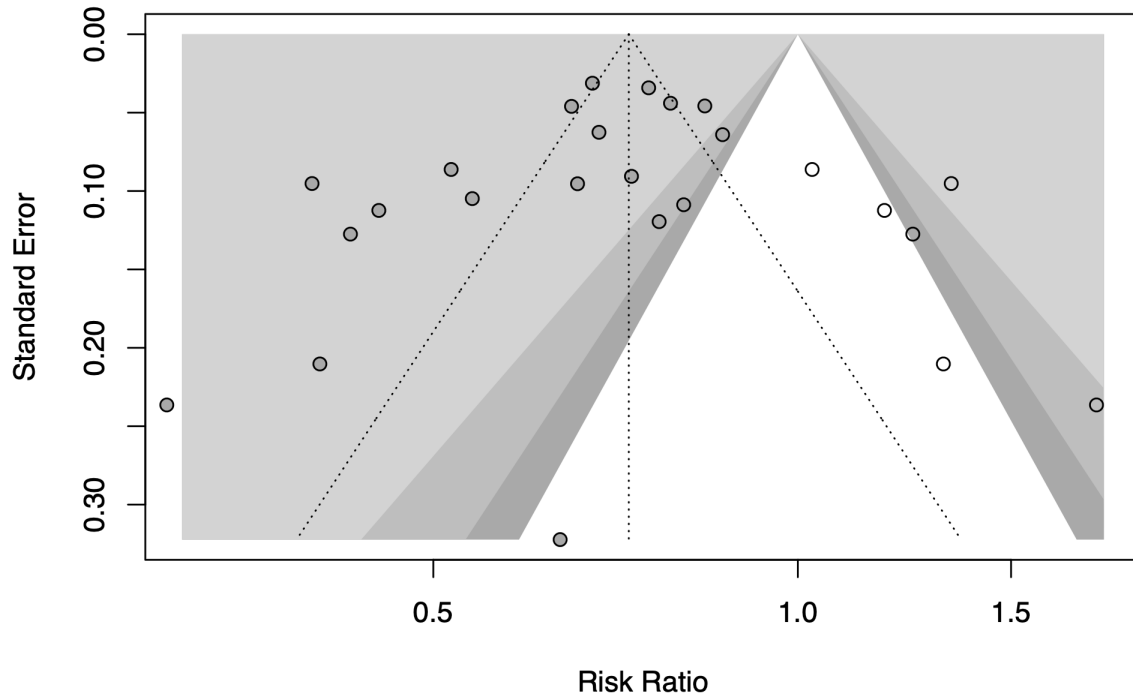

**Linear regression test of funnel plot asymmetry**

Test result:  $t = -2.57$ ,  $df = 17$ ,  $p\text{-value} = 0.0198$

Number of studies combined:  $k = 25$  (with 6 added studies)

Using random effects model:

Risk ratio: 0.7251

95%-CI: 0.6551; 0.8026

Quantifying heterogeneity:

$\tau^2 = 0.0534$  [0.0540; 0.2184];  $\tau = 0.2311$  [0.2324; 0.4673]

$I^2 = 91.2\%$  [88.2%; 93.4%];  $H = 3.37$  [2.92; 3.89]

Test of heterogeneity:

$Q: 272.61$

d.f.: 24

$P\text{-value} < 0.0001$

**Supplementary figure 20: Funnel plot with trim-and-fill imputation of potentially missing studies after second dose in IMID patients**

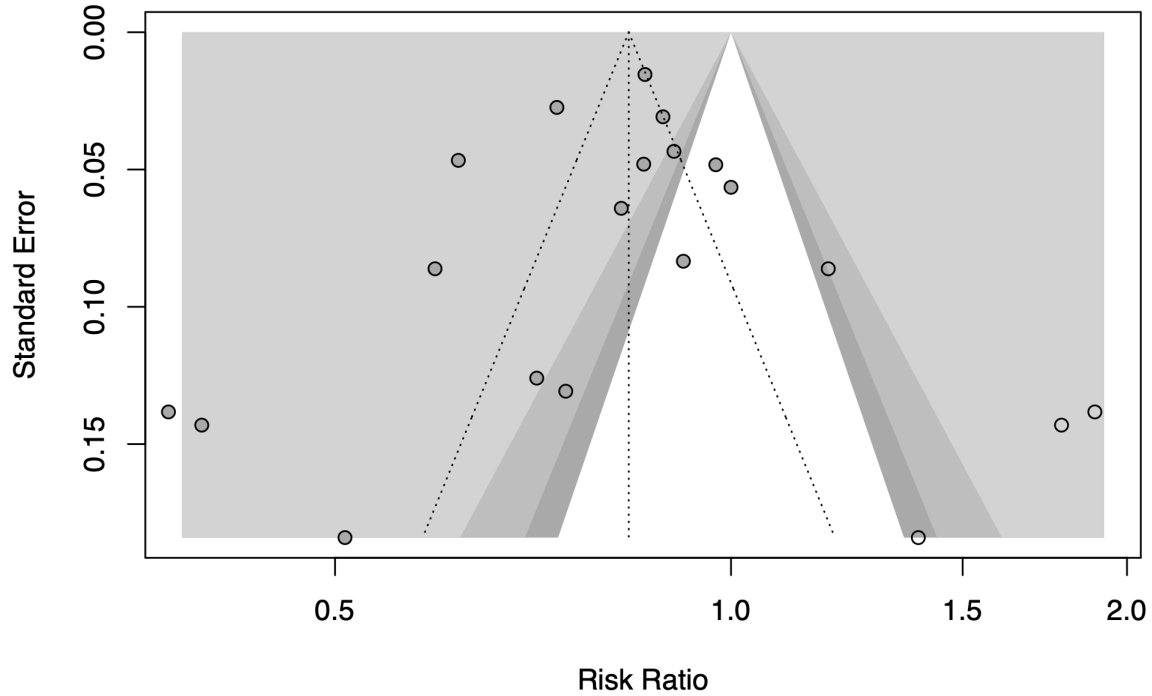

**Linear regression test of funnel plot asymmetry**

Test result:  $t = -1.86$ ,  $df = 14$ ,  $p\text{-value} = 0.0841$

Number of studies combined:  $k = 20$  (with 4 added studies)

Using random effects model:

Risk ratio: 0.8361

95%-CI: 0.7647; 0.9142

Quantifying heterogeneity:

$\tau^2 = 0.0327$  [0.0398; 0.2030];  $\tau = 0.1808$  [0.1994; 0.4505]

$I^2 = 92.9\%$  [90.4%; 94.8%];  $H = 3.75$  [3.22; 4.37]

Test of heterogeneity:

Q: 267.10

d.f.: 19

P-value < 0.0001

**Supplementary figure 21: Funnel plot with trim-and-fill imputation of potentially missing studies after second dose in organ transplant patients**

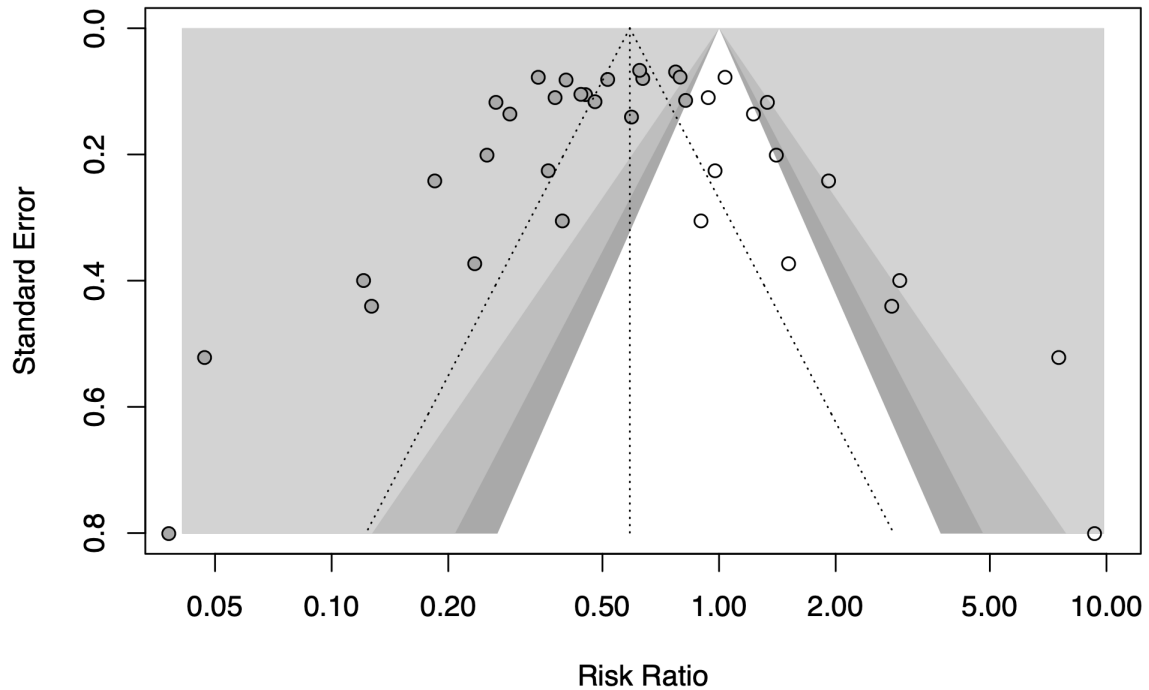

**Linear regression test of funnel plot asymmetry**

Test result:  $t = -3.76$ ,  $df = 22$ ,  $p\text{-value} = 0.0011$

Number of studies combined:  $k = 37$  (with 13 added studies)

Using random effects model:

Risk ratio: 0.5883

95%-CI: 0.4913; 0.7046

Quantifying heterogeneity:

$\tau^2 = 0.2528$  [0.3044; 0.9380];  $\tau = 0.5028$  [0.5517; 0.9685]

$I^2 = 94.1\%$  [92.7%; 95.2%];  $H = 4.10$  [3.69; 4.55]

Test of heterogeneity:

Q: 605.25

d.f.: 36

P-value < 0.0001
